# Supplementary material for: School environmental contamination of methicillin-sensitive Staphylococcus aureus as an independent risk factor for nasal colonization in schoolchildren: An observational, cross-sectional study
Source: PLoS One. 2018 Nov 30;13(11):e0208183. doi: 10.1371/journal.pone.0208183 (PMC6269093; doi:10.1371/journal.pone.0208183)
Supplement: S1 Data — (XLS) [file pone.0208183.s004.xls]

## Sheet: Desecription of data set
This is a data set for a cross-sectional study of school environmental contamination of methicillin-sensitive Staphylococcus aureus as an independent risk factor for nasal colonization in schoolchildren.
The data is provided by Zhenjiang Yao zhjyao2001@yahoo.com
Please contact Dr. Yao if you plan to conduct analyses on these data for publication

## Sheet: Description of variables
Variable name	Variable description
region	Region
school	School
grade	Grade
room	Classroom number
age	Age
gender	Gender
height	Height, cm
weight	Weight, kg
bmi	Body mass index
obese	0 is obese, 1 is non-obese
antibiotic	Ever used of antibiotics within a year, 0 is no, 1 is yes
skin	Ever had skin infections within a year, 0 is no, 1 is yes
allergy	Ever had allergic diseases within a year, 0 is no, 1 is yes
upper	Ever had upper respiratory tract infections within a year, 0 is no, 1 is yes
operation	Ever had surgical interventions within a year, 0 is no, 1 is yes
clinic	Ever had putpatient services within a year, 0 is no, 1 is yes
hospitalization	Ever hospitalized within a year, 0 is no, 1 is yes
towel	Ever shared towel with others within a year, 0 is no, 1 is yes
exercise	Ever had physical exercise every week, 0 is no, 1 is yes
wash	Ever had hand washing everyday, 0 is no, 1 is yes
washafter	Always had hand washed after using toilets, 0 is no, 1 is yes
go	Going to school by public transportation within a year, 0 is no, 1 is yes
fantibiotic	Ever used of antibiotics within a year in family members, 0 is no, 1 is yes
fskin	Ever had skin infections within a year in family members, 0 is no, 1 is yes
fallergy	Ever had allergic diseases within a year in family members, 0 is no, 1 is yes
fupper	Ever had upper respiratory tract infections within a year in family members, 0 is no, 1 is yes
fhospitalization	Ever hospitalized within a year in family members, 0 is no, 1 is yes
healthcare	Family members were healthcare workers, 0 is no, 1 is yes
smoke	Family members were current smokers, 0 is no, 1 is yes
homesize	More than three people in participant's home, 0 is no, 1 is yes
single	Single child, 0 is no, 1 is yes
pet	Living with pets, 0 is no, 1 is yes
sa	Staphylococcus aureus strain, 0 is no, 1 is yes
mssa	Methicillin-sensitive Staphylococcus aureus, 0 is no, 1 is yes
fox	Resistant to cefoxitin, 0 is no, 1 is yes
lzd	Resistant to linezolid, 0 is no, 1 is yes
p	Resistant to penicillin, 0 is no, 1 is yes
cn	Resistant to gentamicin, 0 is no, 1 is yes
tec	Resistant to teicoplanin, 0 is no, 1 is yes
e	Resistant to erythromycin, 0 is no, 1 is yes
sxt	Resistant to trimethoprim-sulfamethoxazole, 0 is no, 1 is yes
c	Resistant to chloramphenicol, 0 is no, 1 is yes
mxf	Resistant to moxifloxacin, 0 is no, 1 is yes
rd	Resistant to rifampin, 0 is no, 1 is yes
te	Resistant to tetracycline, 0 is no, 1 is yes
da	Resistant to clindamycin, 0 is no, 1 is yes
pvl	Positive to pvl gene, 0 is no, 1 is yes
tst	Positive to tst gene, 0 is no, 1 is yes
etb	Positive to etb gene, 0 is no, 1 is yes
eta	Positive to eta gene, 0 is no, 1 is yes
mdr	The strain is multidrug-resistant, 0 is no, 1 is yes
st	Sequence type (MLST)
cc	Clonal complex type
schoolmssa	Number of methicillin-sensitive Staphylococcus aureus isoaltes in correspoding school
roommssa	Number of methicillin-sensitive Staphylococcus aureus isoaltes in correspoding classroom
schoolmssap	Proportion of methicillin-sensitive Staphylococcus aureus isoaltes in correspoding school
roommssap	Proportion of methicillin-sensitive Staphylococcus aureus isoaltes in correspoding classroom
place	Sampling place
location	Sampling location

## Sheet: Data_Children
region	school	grade	room	gender	age	height	weight	bmi	obese	antibiotic	skin	allergy	upper	operation	clinic	hospitalization	towel	exercise	wash	washafter	go	fantibiotic	fskin	fallergy	fupper	fhospitalization	healthcare	smoke	homesize	single	pet	sa	mssa	fox	lzd	p	cn	tec	e	sxt	c	mxf	rd	te	da	pvl	tst	etb	eta
urban	7	5	72	female	11	118	25	17.9546	0	1	1	0	1	0	1	0	0	1	1	1	0	1	0	0	1	0	0	0	0	1	0	0	0
urban	3	4	32	male	11	120	28	19.4444	0	1	0	1	0	0	0	0	0	1	0	1	0	0	1	0	0	0	0	0	1	1	0	0	0
urban	1	5	16	male	10	120	28	19.4444	0	1	0	1	1	0	1	0	0	1	0	1	0	1	0	0	0	0	0	0	1	0	0	1	0
urban	1	4	11	male	10	120	29	20.1389	0	0	1	0	1	0	0	0	1	1	1	0	0	0	1	1	1	0	1	1	1	0	0	0	0
urban	3	4	32	male	10	120	30	20.8333	0	1	1	0	0	0	1	0	0	1	0	0	0	0	1	0	0	1	1	1	1	0	0	0	0
urban	1	4	11	female	10	120	20	13.8889	0	0	0	0	1	0	0	0	0	1	0	0	0	0	0	0	1	0	0	1	1	0	1	0	0
rural	5	4	51	male	10	122	23	15.4528	0	0	1	1	0	0	0	0	1	1	0	0	1	1	0	1	1	0	1	0	1	0	0	0	0
urban	1	4	11	male	9	122	28	18.8121	0	0	0	0	1	0	1	0	1	1	0	0	0	0	1	1	1	0	0	1	1	0	1	0	0
urban	3	5	34	male	11	125	35	22.4	0	1	0	0	0	0	1	0	0	1	0	0	0	0	1	0	1	1	0	0	1	1	1	0	0
urban	1	4	12	female	9	125	25	16	0	1	1	0	1	0	0	0	0	1	0	0	0	0	1	0	1	1	0	0	1	0	1	0	0
urban	1	4	11	female	9	126	21	13.2275	0	1	1	0	1	0	1	0	0	1	1	1	0	1	1	0	1	0	0	1	1	0	0	0	0
urban	3	4	31	male	10	127	32.5	20.15	0	0	1	0	0	0	0	0	0	1	0	1	1	0	0	0	0	0	0	0	1	0	0	0	0
urban	4	4	42	male	9	127	22	13.64	0	0	0	0	0	1	0	0	1	1	0	1	0	0	0	0	0	0	0	1	1	1	0	0	0
urban	4	4	42	female	10	128	24	14.6484	0	0	1	0	1	0	1	0	1	1	1	0	1	0	1	0	1	0	0	1	0	1	0	0	0
urban	2	4	23	male	9	128	28	17.0898	0	0	1	0	0	0	0	0	0	1	0	1	0	0	0	0	1	0	0	1	1	1	0	1	0
urban	2	4	23	female	9	128	25	15.2588	0	1	0	0	1	0	0	0	0	1	1	0	0	1	0	0	0	0	0	1	1	0	0	0	0
urban	1	4	11	male	9	128	30.6	18.6768	0	1	0	0	0	0	1	0	0	1	0	0	0	0	0	0	0	0	0	1	0	1	0	1	0
urban	1	4	12	female	9	128	28	17.0898	0	1	0	1	1	0	0	0	0	1	0	0	0	1	1	1	1	1	0	1	1	0	1	0	0
rural	5	5	53	male	11	130	25	14.7929	0	0	1		1	0	1	0	1	1	0	0	1	0	0	0	0	1	0	1	1	0	0	0	0
rural	5	5	53	male	11	130	32	18.9349	0	1	0	0	1	0	1	0	0	1	0	1	0	0	1	0	1	1	0	1	1	1	1	1	0
urban	1	4	11	male	11	130	27	15.9763	0	0	1	0	1	0	0	0	0	0	0	1	0	0	1	0	0	0	0	0			0	1	0
rural	5	4	52	male	11	130	20	11.8343	0		1		0	0		0			1	0	0		1		0		0	1	1	0	1	0	0
rural	6	4	61	male	11	130	25	14.7929	0	1	0	1	1	0	0	0	1		0		0	0	1	1	0	0	1	1	1	0	1	0	0
rural	5	5	53	male	10	130	25	14.7929	0	1	1	1	1	0	1	0	0	1	1	1	0	0	0	0	0	0	0	1	0	1	0	0	0
urban	7	5	74	male	10	130	34	20.1183	0	0	0	0	1	0	1	0	0	1	0	0	0	0	0	1	1	0	0	0	0	1	0	0	0
rural	6	4	62	male	10	130	30	17.7515	0	0	0	1	1	1	1	0	1	1	1	0	1	0	0	0	0	0	0	0	1	0	1	0	0
rural	5	4	52	male	10	130	28	16.568	0	1	0	0	1	0	0	0	0	1	1	0	1	0	0	0	0	0	1	1	1	0	1	0	0
rural	5	4	52	female	10	130	23	13.6095	0	0	1	0	1	0	0	0	0	1	0	1	0	0	0	0	1	0	0	1	1	0	0	0	0
urban	2	4	22	male	10	130	38	22.4852	0	0	0	0	0	0	0	0	0	1	0	1	0	0	0	0	0	0	0	0	1	1	0	0	0
rural	6	4	61	female	10	130	30	17.7515	0	1	0	0	1	1	1	1	0	1	0	0	0	1	1	0	1	0	0	1	1	0	0	0	0
urban	4	4	41	male	10	130	20	11.8343	0	1	0	0	0	0	1	0	0	1		1	0	0	0	0	0	1	0	1	1	0	1	0	0
urban	4	4	44	female	10	130	27	15.9763	0	1	1	0	0	0	1	0	0	0	0		0	0	0	0	0	0	0	0	0	1	1	0	0
urban	1	4	11	male	10	130	30	17.7515	0	0	0	1	1	0	1	0	0	1	1	0	0	0	0	0	1	0	0	1	1	1	0	0	0
rural	6	4	62	female	10	130	24	14.2012	0	1	0	0	0	0	0	0	0	0		1	0	0	0	0	0	0	0	1	1	1	0	0	0
rural	6	4	61	female	10	130	30	17.7515	0	1	1	1	1	0	1	1	0	1	0	0	0	0	1	1	1	1	0	0	1	0	1	1	0
urban	2	4	22	male	10	130	26	15.3846	0	1	0	0	0	0	0	0	0	1	1	1	0	1	0	0	1	0	0	0	1	0	1	0	0
urban	2	4	22	male	9	130	30	17.7515	0	1	1	0	1	1	1	0	0	1	0	0	0	0	0	0	0	0	0	1	1	0	1	0	0
urban	2	4	23	male	9	130	33	19.5266	0	0	0	0	0	0	0	0	1	0	0	0	0	1	0	0	0	0	0	0	1	0	0	0	0
urban	4	4	41	male	9	130	25.1	14.8521	0	0	0	0	1	0	0	0	0	1	1	0		1	0	0	1	0	0	0	1	0	0	0	0
urban	4	4	43	male	9	130	23	13.6095	0	0	1	0	0	0	1	0	0	1	1	1	0	0	0	0	0	0	0	1	0	1	0	0	0
rural	5	4	51	female	9	130	32.5	19.2308	0	0	0	1	1	0	0	0	0	1	0	0	0	0	0	1	0	1	1	1	1	0	0	0	0
urban	1	4	11	male	9	130	23	13.6095	0	0	1	0	0	0	0	0	0	1	0	0	0	1	0	0	1	0	0	1	0	1	0	1	0
rural	6	4	61	male	9	130	30	17.7515	0	1	0	0	0	0	0	0	0	1	0	1	1	0	0	0	0	0	0	1	1	0	1	0	0
rural	5	4	51	female	9	130	26.5	15.6805	0	0	1	0	1	0	0	0	1	1	0	1	1	0	0	0	0	0	0	1	1	0	0	0	0
urban	1	4	12	female	9	130	26	15.3846	0	1	0	0	1	0	1	0	0	1	1	0	0	0	0	0	0	0	0	0	1	0	0	1	0
urban	3	5	33	male	9	130	31	18.3432	0	1	0	0	0	0	0	0	1	0	0	0	0	0	0	0	0	0	1	0	0	1	0	0	0
urban	1	4	12	male	9	130	30	17.7515	0	1	1	1	1	0	1	0	0	1	0	1	0	1	1	1	1	1	0	1	1	0	0	0	0
urban	7	5	74	male	11	131	33	19.2296	0	1	1	1	0	0	0	0	0	1	0	1	1	1	1	0	0	0	0	1	1	0	0	0	0
urban	3	5	34	female	11	131	32	18.6469	0	0	0	0	0	0	0	0	0	1	1	1	0	0	0	0	0	0	0	0	1	0	0	0	0
urban	7	5	73	male	10	131	25	14.5679	0	1	1	0	0	0	1	0	0	1	0	0	1	0	1	0	0	0	0	1	1	0	0	0	0
urban	1	4	12	male	10	131	32	18.6469	0	1	0	0	1	1	1	0	1	1	1	1	0	0	1	0	1	0	0	1	1	0	0	0	0
rural	6	4	62	female	10	131	27	15.7333	0	1	0	0	0	0	0	0	0	1	0	1	0	0	0	0	0	0	0	1	1	0	0	0	0
urban	3	4	31	male	10	131	30	17.4815	0	1	1	0	1	0		0	0	1	0	0	0	1	1	0	1	0	0	1	1	0	0	0	0
rural	6	4	61	male	9	131	30	17.4815	0	1	1	1	1	0	0	0	0	1	0	0	0	0	0	0	1	0	1	1	1	0	0	0	0
rural	6	4	61	female	9	131	22	12.8198	0	1	1	0	1	0	0	0	1	1	0	1	0	0	0	0	0	0	1	1	1	0	1	0	0
urban	4	4	42	male	13	131	29	16.8988	0	1	1	0	1	0	0	0	1	1	0	0	0	1	1	0	0	1	0	0	1	0	0	0	0
urban	2	4	23	male	10	132	26	14.9219	0	0	0	1	1	0	1	0	0	1	0	1	0	0	0	1	1	0	0	0	1	0	0	0	0
urban	1	4	11	female	10	132	25	14.348	0	1	0	0	1	0	1	0	1	1	1	0	0	0	0	0	0	0	0	0			0	1	0
rural	6	4	62	female	10	132	30	17.2176	0	1	1	0	1	0	1	0	0	1	1	0	1	0	1	0	0	0	0	1	1	1	0	0	0
urban	3	4	32	female	10	132	25	14.348	0	0	0	0	0	0	0	0	1	1		1	0	0	0	0	0	0	0	1	1	0	0	0	0
rural	6	4	62	female	10	132	25	14.348	0	1	0	0	1	0	0	0	0	1	1	0	1	0	0	0	1	0	0	1	1	0	1	0	0
urban	1	4	12	male	10	132	29	16.6437	0	1	1	0	1	0	1	0	0	1	0	0	0	1	1	1	1	0	0	1	1	0	0	0	0
urban	2	4	22	female	9	132	26	14.9219	0	1	1	0	1	0	1	0	0	1	1	1	0	0	1	0	0	0	0	1	1	0	0	0	0
urban	3	4	31	female	9	132	26	14.9219	0	1	1	0	1	0	0	0	0	1	0	1	0	0	1	0	1	0	0	1	1	0	0	0	0
urban	2	4	21	male	8	132	30	17.2176	0	0	1	0	1	0	0	0	1	1	0	1	0	0	0	0	0	0	0	1	1	0	1	0	0
rural	5	4	52	male	10	133	26	14.6984	0	1	0	0	0	0	0	0		1	1	0	0	1	0	0	1	0	0	1	1	0	0	0	0
rural	6	5	64	male	10	133	20	11.3065	0	0	0	0	1	0	1	0	0	1	1	1	0	1	0	0	1	0	0	1	1	1	0	0	0
urban	1	5	14	male	10	133	32.5	18.373	0	0	1	1	1	0	1	0	1	1	0	1	0	1	0	1	1	1	0	0	0	1	1	0	0
urban	1	5	16	female	10	133	28	15.829	0	0	0	0	1	0	0	0	0	1	0	0	0	0	1	0	1	0	1	1	1	0	0	0	0
urban	2	4	22	male	10	133	35.5	20.069	0	1	0	0	0	0	1	0	0	1	0	0	0	1	0	1	1	0	0	0	0	1	0	0	0
rural	6	4	62	female	10	133	25	14.1331	0	1	0	0	1	0	0	0	0	1	0	1	0	0	0	0	1	0	0	0	1	0	1	0	0
urban	8	4	82	female	9	133	25	14.1331	0	0	1	0	1	0	0	0	0	1	1	0	0	0	1	0	1	0	0	0	1	0	0	0	0
urban	2	4	21	female	9	133	22.5	12.7198	0	0	1	0	0	0	0	0	1	1	0	0	0	1	1	0	0	0	0	0	0	1	0	0	0
urban	7	5	73	male	11	134	31	17.2644	0	1	1	0	0	0	1	0	0	1		0	1	0	1	0	0	0	1	1	1	0	0	0	0
urban	3	5	33	male	11	134	26	14.4798	0	0	0	0	1	0	1	0	0	1	0	0	0	0	0	0	1	0	0	0	0	1	0	0	0
urban	3	4	31	female	10	134	25	13.9229	0	0	0	0	0	1	1	1		1	0	1	0	1	0	0	0	1	0	1	1	0	0	0	0
rural	5	5	54	female	10	134	25.4	14.1457	0	0	0	0	0	0	0	0	0	1	1	1	1	0	1	0	0	0	0	1	1	0	0	1	0
urban	8	4	81	female	10	134	28	15.5937	0	0	1	0	1	0	0	0	0	1	0	0	0	0	1	0	1	0	0	0	1	0	0	0	0
urban	1	4	13	male	10	134	39	21.7198	0	0	0	0	0	0	0	0	1	1	0	0	0	0	0	0	0	0	0	0	1	0	1	0	0
urban	1	4	12	male	10	134	30	16.7075	0	1	0	0	1	0	0	0	0	1	1	1	0	0	0	0	1	0	0	1	1	0	0	0	0
rural	6	4	61	male	10	134	28	15.5937	0	1	0	0	1	0	0	0	0	1	1	0	0	0	0	0	0	0	1	1	1	0	0	0	0
urban	1	4	13	male	10	134	25	13.9229	0	1	0	0	1	0	1	0	0	1	0	0	0	0	1	1	1	0	0	0	1	0	0	0	0
urban	1	4	12	male	10	134	23	12.8091	0	0	1	0	1	0	0	0	0	1	1	0	0	0	0	1	0	0	0	1	1	0	0	0	0
rural	5	4	51	female	10	134	28	15.5937	0	1	0	0	1	0	1	0	0	1	0	0	1	0	0	0	0	0	0	1	1	0	1	0	0
urban	3	4	32	male	10	134	27	15.0368	0	0	1	0	1	0	1	0	0	1	0	1	0	0	0	0	0	0	0	0	1	0	0	0	0
urban	1	4	11	male	9	134	35	19.4921	0	1	1	0	1	0	1	0	1	1	0	0	0	1	0	0	0	0	0	0	1	0	1	1	0
urban	1	4	13	female	9	134	25	13.9229	0	0	0	0	0	0	1	0	0	1	0	0	0	0	0	0	0	0	0	0	1	0	0	0	0
urban	2	4	21	male	9	134	27.5	15.3152	0	0	1	0	1	0	1	0	1	1	0	0	0	1	1	0	1	0	1	1	1	0	0	0	0
urban	2	4	21	male	9	134	25.1	13.9786	0	1	1	0	1	0	1	0	0	1	0	1	0	0	1	0	1	0	0	1	0	1	1	0	0
urban	1	4	13	female	9	134	22	12.2522	0	1	1	0	1	0	1	0	0	1	0	0	0	0	0	0	1	0	0	1	0	1	1	1	0
urban	1	4	11	female	9	134	23	12.8091	0	0	0	1	1	0	1	0	0	1	0	0	0	0	0	0	0	1	0	0	1	0	0	1	0
rural	6	4	61	female	10	134	30	16.7075	0	1	0	0	0	0	0	0	0	0		0	0	0	0	0	0	0	0	1	1	0	0	0	0
urban	4	5	48	male	11	135	27	14.8148	0	0	0	0	0	0	1	0	0	1	0	0	0	0	0	0	0	0	0	0	1	0	0	0	0
rural	5	5	53	female	11	135	24	13.1687	0	0	1	0	0	0	1	0	0	0	0	0	1	1	1	0	1	1	0	1	1	1	0	0	0
urban	8	5	83	female	11	135	25	13.7174	0	0	1	0	0	0	0	0	0	1	0	1	0	0	1	0	1	0	0	0	0	1	0	0	0
rural	5	5	54	female	11	135	31	17.0096	0	0	0	0	1	0	0	0	1	1	1	1	0	1	1	0	1	0	0	0	1	0	0	0	0
urban	7	5	72	male	11	135	26	14.2661	0	0	1	0	0	0	1	0	0	1	0	0	0	0	1	0	1	0	0	1	0	1	1	1	0
urban	2	5	24	female	11	135	28	15.3635	0	0	0	0	1	0	0	0	0	1	0	1	0	0	0	0	1	0	0	0	1	0	0	0	0
urban	8	5	84	male	11	135	37	20.3018	0	1	1	1	1	0	1	0	0	1	0	1	0	1	1	1	1	0	0	0	1	0	1	0	0
rural	5	4	51	male	11	135	31.5	17.284	0	1	0	0	1	0	0	0		1	0	0	0	1	0	0	0	0	0	1	1	0	1	1	0
urban	2	5	26	female	11	135	25	13.7174	0	0	0	0	1	0	1	1	0	1	0	1	0	0	0	0	1	0	0	1	1	0	0	1	0
urban	8	5	84	male	11	135	32.5	17.8326	0	0	1	0	1	1	1	0	0	1	0	1	0	1	0	0	1	0	1	0	1	1	0	0	0
urban	1	5	15	male	11	135	30	16.4609	0	0	0	0	0	0	1	0	0	1	0	1	0	0	0	0	0	0	0	0	0	1	0	0	0
urban	3	5	33	male	10	135	32	17.5583	0	0	0	0	0	0	1	0	0	1	0	1	0	0	0	0	0	0	0	0	1	0	0	0	0
urban	2	5	26	female	10	135	26	14.2661	0	0	0	0	1	0	1	0	0	1	1	1	0	1	0	1	0	0	0	1	1	0	0	0	0
urban	4	5	47	male	10	135	38	20.8505	0	0	0	0	1	0	0	0	0	1	0	1	0	1	0	0	1	1	0	0	0	1	0	0	0
urban	1	5	15	male	10	135	40	21.9479	0	1	0	0	1	0	1	1	1	1	0	0		0	0	0	0	1	0	0	0	1	0	0	0
urban	7	5	74	female	10	135	30	16.4609	0	0	0	1	0	0	1	0	0		0	1	0	0	0	1	0	0	0	1	1	0	0	0	0
urban	4	4	41	male	10	135	27	14.8148	0	0	1	0		0	0	0	0	1	0	1	0	0	0	0	0	0	0	0	0	1	0	0	0
rural	5	4	52	female	10	135	25	13.7174	0	1	1	1	1	0	1	0	0	1	0	0	1	1	1	0	1	1	0	1	1	0	1	1	0
rural	5	5	53	female	10	135	25	13.7174	0	1	1	0	1	0	0	0	0	1	1	0	1	1	1	0	0	0	0	0	1	1	1	0	0
rural	5	4	52	female	10	135	36	19.7531	0	1	0	0	1	0	0	0		1	1	1	1	0		0	0	0	0	0	1	0	1	0	0
rural	5	4	51	male	10	135	24	13.1687	0	0	1	0	1	0	1	0	1	1	0	1	0	1	1	0	1	0	1	0	1	0	0	0	0
rural	6	4	62	female	10	135	25	13.7174	0	1	0	0	0	0	0	0	0	0	0	0	1	0	0	0	0	0	0	1	1	0	0	0	0
urban	3	4	32	female	10	135	35	19.2044	0	0	0	0	0	0	0	0	0	0	0	0	0	0	0	0	0	1	0	0	1	0	1	0	0
urban	3	4	32	female	10	135	30	16.4609	0	1	0	0	0	0	0	0	0	1	0	1	0	0	0	0	0	0	0	1	1	1	0	0	0
rural	5	4	52	male	10	135	25	13.7174	0	1	0	0	0	0	0	0	1	1	0	0	1	0	0	0	0	1	0	1	0	1	1	0	0
urban	8	4	82	female	10	135	26	14.2661	0	0	0	0	1	0	1	0	0	1	1	1	0	0	0	1	1	0	0	1	1	0	0	0	0
rural	5	4	52	male	10	135	20	10.9739	0	1	1	0	1	0	0	0	0	1	0	0	0	0	1	0	1	0	0	1	0	1	0	0	0
urban	3	4	32	male	10	135	36	19.7531	0	1	1	0	0	0	0	0	1	1		1												0	0
urban	1	4	12	female	10	135	27.5	15.0892	0	0	0	0	1	0	0	0	0	1	0	0	0	0	0	0	0	0	0	1	1	0	0	0	0
urban	1	4	11	female	10	135	20	10.9739	0	0	0	0	0	0	0	0	0	1	0	1	0	0	0	0	0	0	0	1	1	0	0	1	0
rural	5	4	51	female	10	135	23.5	12.8944	0	1	1	0	0	0	0	0	0	1	0	1	1	0	1	0	1	0	0	1	1	0	0	0	0
rural	6	4	61	female	10	135	25	13.7174	0	1	0	0	1	0	1	0	0	1	1	1	0	1	1	0	0	0	0	1	1	0	1	0	0
rural	6	4	61	female	10	135	24	13.1687	0	1	0	0	0	0	1	0	1	1		0	0	1	0	0	0	0	0	1	1	0	1	0	0
rural	6	4	61	female	10	135	24	13.1687	0	1	0	0	1	0	0	0	1	1	0	0	0	1	0	0	0	1	1	0	1	0	0	0	0
urban	2	4	23	male	10	135	29	15.9122	0	0	0	0	0	0	0	0	0	1	0	1	0	0	0	0	0	0	0	1	0	1	0	0	0
rural	5	4	51	male	10	135	26.5	14.5405	0	1	0	0	1	0	1	0	0	1	0	1	0	0	0	0	1	0	0	1	1	0	0	0	0
urban	3	5	34	female	10	135	31	17.0096	0	1	1	0	1	0	0	0	1	1	0	0	0	1	1	0	1	1	1	0	1	0	1	0	0
urban	2	4	22	male	10	135	30	16.4609	0	1	0	1	1	0	1	0	0	0	0	0	0	0	0	0	0	0	0	1	0	1	0	0	0
rural	6	4	61	female	10	135	36	19.7531	0	1	0	0	1	0	0	0	0	1	0	0	0	0	0	0	0	0	0	0	1	0	0	1	0
urban	3	4	31	female	10	135	34	18.6557	0	0	0	1	0	0	1	0	0	1	0	1	0	0	0	0	1	0	0	1	1	0	0	0	0
rural	6	4	61	female	10	135	26	14.2661	0	0	0	0	1	0	0	0	0	1	0	1	0	0	0	0	0	0	0	1	1	0	1	0	0
rural	5	4	51	female	10	135	28	15.3635	0	1	1	0	1	0	0	0	1	1	0	0	1	0	1	1	0	0	0	1	1	0	1	1	0
urban	8	4	81	male	10	135	35	19.2044	0	1	1	0	1	0	1	0	0	1	0	1	0	0	0	0	1	0	0	0	1	0	0	0	0
urban	2	4	22	female	9	135	35	19.2044	0	0	0	0	0	0	0	0	0	1	0	1	0	0	0	0	0	0	0	1	1	0	0	0	0
urban	1	4	12	female	9	135	25	13.7174	0	1	0	0	1	0	1	0	1	1	0	0	0	1	1	0	1	1	0	1	1	0	0	0	0
urban	2	4	21	male	9	135	25.5	13.9918	0	0	1	0	1	0	0	0	0	1	0	0	0	0	1	0	0	0	0	1	0	1	0	0	0
urban	4	4	42	female	9	135	30	16.4609	0	1	1	1	1	0	1	0	1	1	1	1	0	0	1	0	1	0	0	0	1	0	0	0	0
urban	4	4	42	female	9	135	31	17.0096	0	0	1	1	1	0	1	0	1	1	1	1	0	0	1	1	1	1	0	0	1	0	0	0	0
rural	6	4	62	male	9	135	26	14.2661	0	1	1	0	1	0	0	0	0	1	0	0	0	0	0	0	1	0	0	1	1	0	0	0	0
urban	4	4	44	female	9	135	23	12.62	0	1	1	0	1	0	1	0	1	1	1	1	0	1	0	0	0	1	0	1	1	0	1	0	0
urban	1	4	11	female	9	135	36	19.7531	0	0	1	1	0	0	1	0	0	1	0	1	0	0	0	1	0	0	0	0	0	1	0	0	0
rural	5	4	52	male	9	135	29	15.9122	0	1	0	0	0	0	1	0	1	0	0		1	0		0	0	1	0	0	1	1	1	0	0
rural	6	4	62	female	9	135	24	13.1687	0	1	0	0	1	0	0	0	0	1	0	1	0	1	0	0	1	0	0	1	1	0	1	0	0
urban	1	4	11	female	9	135	30	16.4609	0	0	0	1	0	0	0	0	0	1	1	1	0	0	0	0	0	0	0	0	1	0	0	1	0
urban	3	4	31	male	9	135	31	17.0096	0	1	1	0	1	0	1	0	1	1	1	1	0	0	1	1	1	0	1	1	1	0	0	0	0
urban	2	4	21	female	9	135	30	16.4609	0	0	0	0	0	0	0	0	0	1	0	0	0	0	0	0	0	0	0	0	1	0	1	0	0
rural	6	4	61	female	11	135	20	10.9739	0	1	0	0	1	1	1	1	0	1	1	0		1	0	0	1	1	0	1	1	0	1	0	0
urban	7	5	74	female	11	136	31	16.7604	0	0	0	1	1	0	0	0	0	1	0	1	0	0	0	0	0	0	0	1	1	0	0	0	0
urban	7	5	73	female	11	136	28.6	15.4628	0	0	0	0	1	0	0	0	0	1	0	1	0	0	1	0	1	0	0	1	1	0	0	0	0
rural	5	5	54	male	11	136	30	16.2197	0	1	0	0	1	0	0	0	1	1	0		1	1	0	0	1	0	0	1	1	0	0	0	0
urban	4	5	46	female	11	136	30	16.2197	0	0	0	0	1	0	1	0	0	1	0	1	0	0	0	0	1	0	0	1	1	0	0	0	0
rural	6	4	61	male	10	136	24	12.9758	0	1	0	0	0	0	0	0	0	1	0	1	0	0	0	0	0	0	0	0	1	0	1	0	0
rural	6	5	64	female	10	136	30	16.2197	0	0	0	0	0	0	0	0	0	1		0	0	0	0	0	0	0	0	0	0	1	1	0	0
rural	6	4	61	male	10	136	31	16.7604	0	1	1	0	1	0	1	0	0	1	0	0	1	1	1	1	1	0	1	0	1	1	1	0	0
rural	6	5	64	female	10	136	32	17.301	0	1	1	1	1	0	1	0	0	1	0	0	0	0	1	1	1	1	0	1	1	0	1	0	0
rural	5	4	51	male	10	136	33	17.8417	0	1	1	0	0	0	0	0	0	1	1	1	1	1	0	0	0	0	0	1	1	1	1	0	0
urban	2	4	22	male	10	136	30	16.2197	0	1	0	0	1	0	1	0	1	1	0	1	0	0	1	0	1	0	0	0	0	1	0	0	0
rural	5	4	52	male	10	136	39	21.0856	0	0	1	1	0	0	0	0	1	1	0	0	0	0	1	0	0	0	0	1	1	0	0	0	0
rural	6	4	62	male	10	136	32.5	17.5714	0	0	0	0	0	0	0	0	0	1	1	0	0	1	0	0	0	0	0	0	1	0	0	0	0
urban	3	4	31	female	10	136	30	16.2197	0	0	1	0	0	1	1	0	1	1		0	0	0	1	0	0	0	0	1	1	0	0	0	0
urban	8	4	81	female	10	136	25	13.5164	0	0	0	0	1	0	0	0	0	1	0	0	0	0	0	0	1	1	0	0	1	0	0	1	0
urban	2	4	21	male	9	136	29.4	15.8953	0	1	1	1	0	0	1	1	0	1	1	0	0	1	1	1	1	0	0	0	1	0	0	0	0
rural	6	4	62	male	9	136	25	13.5164	0	1	1	0	1	0	0	0	0	1	0		0	0	0	0	0	0	0	1	1	0	1	0	0
urban	1	4	12	female	9	136	35	18.923	0	1	0	0	1	0	1	0	1	1	0	0	0	0	1	1	1	1	0	0	1	0	1	1	0
urban	7	5	71	female	11	136.5	27	14.491	0	0	0	0	1	0	1	0	1	1	1	1	1	0	1	0	1	0	0	1	1	0	0	0	0
rural	5	5	53	female	11	137	28	14.9182	0	1	0	0	0	0	0	0	0	1	1	0	0	0	0	0	0	0	0	1	1	0	0	0	0
urban	2	5	26	female	11	137	30	15.9838	0	1	1	0	1	0	1	0	0	1	1	1	0	1	0	0	0	0	0	0	1	0	0	0	0
urban	3	4	32	female	11	137	30.5	16.2502	0	1	0	0	0	0	0	0	0	1	0	1	0	0	0	0	0	0	0	1	1	0	0	0	0
urban	3	4	32	male	10	137	35	18.6478	0	1	1	0	1	1	1	0	1	1	1	1	0	1	1	0	0	0	0	1	1	0	0	0	0
rural	6	5	63	female	10	137	29	15.451	0	1	0	0	1	0	1	0	0	1	1	1	0	1	0	0	0	0	1	1	1	0	0	0	0
urban	2	5	24	female	10	137	27	14.3854	0	0	1	0	0	0	0	0	0	1	0	0	0	1	0	1	1	0	0	1	1	0	0	0	0
urban	8	4	82	female	10	137	33	17.5822	0	0	1	1	1	1	0	0	0	1	0	1	0	0	0	0	1	0	0	0	1	0	0	0	0
urban	3	4	32	female	10	137	36.5	19.447	0	0	1	0	1	0	0	0	0	1	0	1	0	0	1	0	0	0	0	1	0	1	1	0	0
rural	6	4	61	female	10	137	32	17.0494	0	1	0	0	0	0	1	0	1	1	0	0	1	0	0	0	0	0	0	1	1	0	1	0	0
rural	6	4	62	female	10	137	26	13.8526	0	1	0	0	1	1	0	0	0	0	0	0	0	1	0	0	1	0	0	1	1	0	0	0	0
urban	2	4	23	female	10	137	21	11.1887	0	1	0	0	1	0	1	0	0	1	1	1	0	1	0	0	0	0	0	1	1	1	0	1	0
urban	1	4	12	male	10	137	28	14.9182	0	0	0	0	0	0	0	0	0	1	0	0		0	1	1	0	0	0	1	1	0	0	1	0
rural	6	4	62	female	10	137	26	13.8526	0	1	1	0	1	1	1	1	1	1	1	1	0	0	1	0	1	0	0	0	1	0	0	0	0
rural	6	4	62	female	10	137	25	13.3198	0	1	0	0	1	0	0	0	0	1	0		0	0	0	0	1	0	0	1	1	0	1	0	0
rural	6	4	62	male	10	137	22.5	11.9879	0	0	1	0	1	1	1	0	0	1	1	0	0	1	0	0	1	0	0	1	1	0	0	0	0
rural	6	4	62	female	10	137	25	13.3198	0	1	1	0	0	0	0	0	0	1	0	0	0	0	1	0	1	0	0	1	1	0	0	0	0
urban	2	4	21	male	10	137	27	14.3854	0	0	0	0	1	0	0	0	0	1	0	0	0	0	0	0	1	0	0	1	1	1	0	0	0
urban	3	4	32	male	10	137	25	13.3198	0	0	0	0	1	0	1	0	1	1	0	0		0	0	0	1	0	0	0	0	1	0	0	0
urban	8	4	81	male	10	137	30	15.9838	0	1	0	0	1	0	1	0	0	1	0	1	0	0	0	0	0	0	0	1	1	0	0	0	0
urban	1	4	13	male	10	137	29.5	15.7174	0	1	1	0	1	0	1	0	0	1	1	0	0	0	1	0	1	0	0	0	1	0	0	0	0
urban	8	4	82	female	10	137	24	12.787	0	0	1	0	1	0	1	0	1	1	0	1	0	1	0	0	1	0	0	0	1	0	0	0	0
urban	1	4	11	male	9	137	28.3	15.0781	0	0	1	0	0	0	0	0	0	1	0	1	1	0	0	0	0	0	0	1	1	1	0	0	0
urban	2	4	21	male	9	137	31	16.5166	0	1	1	1	1	0	1	0	0	1	1	1	0	1	1	1	1	0	0	0	1	0	0	0	0
urban	1	4	12	male	9	137	37	19.7134	0	1	1	0	1	0	1	0	0	1	0	1	0	0	1	0	1	1	1	1	1	0	1	0	0
rural	6	4	62	female	9	137	28	14.9182	0	1	1	0	1	0	1	0	1	1	0	1	0	0	1	0	0	1	0	0	1	0	1	0	0
urban	3	4	32	female	9	137	30	15.9838	0	0	0	0	1	0	0	0	0	1	0	1	0	1	0	0	0	0	0	1	1	0	1	0	0
urban	7	5	73	male	11	137.5	26	13.7521	0	1	1	0	1	0	1	0	0	1	0	1		0	0	0	1	0	0	0	0	1	1	1	0
rural	6	5	63	male	11	138	34	17.8534	0	1	0	0	0	0	0	0	0	1	0		1	0	0	0	1	0	0	1	1	0	0	0	0
urban	4	5	46	male	11	138	37.5	19.6912	0	1	0	0	1	0	1	0	0	1	0	1	0	1	1	0	0	0	0	1	0	1	0	0	0
urban	2	5	24	female	11	138	23	12.0773	0	1	0	0	1	0	1	0	1	1	0	1	0	0	1	0	1	0	0	0	0	1	1	0	0
urban	7	5	74	male	11	138	27	14.1777	0	0	1	0	0	0	1	0	0	1	1	1	0	0	1	1	1	0	0	0	0	1	0	0	0
urban	7	5	74	male	11	138	36	18.9036	0	1	1	1	1	0	1	0	1	1	0	0	1	1	1	1	1	1	0	1	0	1	0	0	0
urban	7	5	72	male	11	138	41	21.5291	0	0	1	0	0	0	1	0	0	1	1	1	0	0	0	0	0	0	0	1	0	1	0	0	0
urban	8	5	83	male	11	138	30	15.753	0	0	1	0	1	0	0	0	0	1	1	0	0	0	0	0	1	0	0	1	1	0	1	0	0
urban	1	5	16	female	11	138	28	14.7028	0	0	0	0	0	0	0	0	0	1	0	0	0	0	0	0	0	0	0	1	1	0	1	0	0
urban	8	4	81	female	10	138	28	14.7028	0	0	1	0	0	0	1	0	0	1	0	1	0	1	1	1	1	0	0	0	1	0	0	0	0
urban	4	4	42	female	10	138	30	15.753	0	0	0	0	0	0	0	0	0	1	1	1	0	0	0	0	1	0	0	0	1	0	0	0	0
urban	2	4	22	male	10	138	26	13.6526	0	0	0	0	0	0	0	0	0	1	0	0	0	1	0	1	0	0	0	0	1	0	0	0	0
urban	8	4	81	female	10	138	30	15.753	0	0	1	0	1	0	1	0	0	1	0	1	0	0	1	0	1	0	0	0	1	0	0	0	0
urban	1	4	13	male	10	138	25	13.1275	0	1	1	0	1	0	1	0	0	1	1	0	0	1	1	0	1	0	0	1	1	1	0	0	0
urban	2	4	21	female	10	138	28.6	15.0179	0	1	1	1	1	0	0	0	0	1	0	1	0	1	1	1	1	0	0	0	0	1	0	1	0
rural	6	4	62	male	10	138	30	15.753	0	1	0	0	0	0	0	0	0	1	0	0	0	0	0	0	0	0	0	0	1	0	1	0	0
urban	8	4	81	male	10	138	31	16.2781	0	0	1	0	1	0	1	0	0	1	1	1		0	0	0	1	1	0	1	1	0	0	0	0
rural	6	4	61	male	10	138	26	13.6526	0	1	0	0	0	0	0	0	0	1	0	1	0	0	0	0	0	0	0	1	1	0	0	0	0
urban	4	4	42	male	10	138	25	13.1275	0	0	0	1	0	0	1	0	1	1	0	1	0	0	0	0	0	1	0	0	1	0	0	0	0
urban	8	4	82	male	10	138	40	21.004	0	1	1	0	0	0	0	0	0	1	0	1	0	0	1	0	0	0	0	0	1	0	0	0	0
urban	4	4	42	male	9	138	33.3	17.4858	0	1	1	0	1	0	1	0	1	0	0	0	0	0	0	0	0	1	0	1	1	0	0	0	0
urban	3	4	32	female	9	138	28	14.7028	0	0	0	0	1	0	1	0	0	1	1	1	0	0	0	0	1	0	0	0	1	0	0	0	0
urban	4	4	41	female	9	138	29	15.2279	0	0	0	0	1	0	0	0	1	1	0	1	0	0	0	0	1	0	0	1	1	0	0	1	0
rural	6	4	61	male	9	138	34	17.8534	0	1	0	0	0	0	0	0	0	1	0	0	0	0	0	0	0	0	0	1	1	0	0	0	0
urban	2	4	22	male	9	138	40	21.004	0	0	0	0	0	0	1	0	0	1	1	0	0	0	0	0	1	0	0	1	0	1	0	0	0
rural	5	4	51	male	9	138	25	13.1275	0	0	1	0	0	0	1	0	0	1	0		0	0	0	0	0	0	0	0	1	0	0	0	0
urban	2	4	21	male	9	138	26	13.6526	0	1	0	0	0	0	0	0	0	1	0	0	0	0	0	0	0	0	0	0	1	1	0	0	0
rural	5	4	52	male	9	138	25	13.1275	0	1	0	0	0	0	0	1	0	1	0	0	1	0	0	0	0	1	0	1	1	0	0	0	0
urban	4	4	42	male	10	138	24	12.6024	0	1	0	1	1	0	1	0	0	1		1	0	0	1	1	1	0	0	0	1	0	1	0	0
urban	7	5	72	male	11	139	25	12.9393	0	1	1	0	1	0	1	0	1	1	1	1	0	1	1	1	1	0	0	1	1	0	1	0	0
urban	4	5	45	female	11	139	30	15.5271	0	0	0	0	1	0	1	0	0	1	0	0	0	1	1	0	0	0	0	0	1	0	0	0	0
urban	4	5	45	female	11	139	25	12.9393	0	0	0	0	1	0	1	0	0	1	1	1	0	1	0	0	1	1	0	1	1	0	0	0	0
urban	8	5	84	male	11	139	32	16.5623	0	1	0	0	0	0	0	0	0	1	0	0	0	0	1	0	0	0	0	1	1	0	0	0	0
urban	8	5	83	female	11	139	35	18.115	0	0	0	0	1	0	0	0	1	1	0	0	0	0	0	0	0	0	0	0	1	0	0	0	0
urban	7	5	73	male	10	139	30	15.5271	0	1	0	1	1	0	0	0	0	1	0	0	0	1	1	1	1	1	0	0	1	0	0	0	0
urban	2	5	25	male	10	139	26	13.4569	0	0	0	1	0	0	1	0	0	1	0	0	0	0	0	0	1	0	0	1	0	1	0	0	0
rural	6	4	61	female	10	139	28	14.492	0	0	1	0	1	0	0	0	0	1	0	1	1	0	0	0	1	0	0	1	1	0	1	0	0
urban	1	4	12	male	10	139	30	15.5271	0	0	0	0	0	0	0	0	0	0	0	0		0	0	1	0	1	0	0	0	1	1	1	0
urban	1	4	12	female	10	139	40	20.7029	0	1	0	0	0	0	0	0	1	1	1	0	0	1	0	0	0	0	0	0	1	0	0	0	0
urban	8	4	81	female	10	139	29	15.0096	0	1	0	0	1	0	1	0	0	1	1	1	0	0	0	0	1	0	0	0	0	1	0	0	0
urban	4	4	42	female	10	139	26	13.4569	0	0	1	0	1	1	1	0	0	1	0	1	0	0	1	0	1	0	0	1	1	1	1	0	0
urban	8	4	82	female	10	139	35	18.115	0	1	0	0	1	0	1	0	0	1	0	0	0	0	0	0	0	0	0	1	0	1	0	0	0
urban	2	4	21	male	10	139	31	16.0447	0	1	0	0	0	0	1	0	1	1	0	1	0	1	0	0	0	0	0	0	1	0	0	0	0
urban	2	4	22	female	9	139	26.5	13.7156	0	0	0	0	0	0	0	0	0		0	0	0	1	1	0	0	0	0	0	1	0	1	1	0
urban	2	4	22	female	9	139	27	13.9744	0	1	0	0	1	0	1	0	1	1	0	1	0	0	0	0	1	0	0	1	1	0	0	0	0
urban	3	4	31	male	9	139	38	19.6677	0	1	1	0	1	0	1	0	0	1	0	1	0	1	1	0	1	0	0	1	1	0	0	0	0
rural	6	4	62	male	9	139	28	14.492	0	1	1	0	1	0	1	0	0	1		0	1	0	1	0	1	0	0	1	1	0	0	1	0
urban	4	4	42	female	9	139	29	15.0096	0	0	0	1	1	0	0	0	0	1	0	0	0	0	1	1	0	0	0	1	0	1	0	0	0
urban	4	4	42	male	9	139	31.5	16.3035	0	0	1	0	1	0	0	0	0	1	0	1	0	0	1	0	0	0	0	1	0	1	0	0	0
urban	4	4	41	female	9	139	40	20.7029	0	0	1	0	1	0	0	0	1	1	0	1	0	0	0	0	1	0	0	0	0	1	0	0	0
rural	5	4	52	male	9	139	24.6	12.7323	0	1	0	0	0	0	1	0	0	0	0	0	0	0	0	0	0	0	0	1	1	0	1	0	0
urban	4	5	47	male	11	139.5	37	19.0131	0	1	1	0	0	0	1	0	0	1	0	0	0	0	0	0	0	0	0	0	0	1	0	1	0
urban	7	5	74	male	10	139.5	31	15.9299	0	0	1	1	1	0	1	0	0		0	0	1	1	1	1	0	1	0	0	1	0	0	0	0
rural	5	5	53	female	12	140	28	14.2857	0	1	1	0	1	0	1	0	0	1	0	1	1	0	1	0	1	0	0	1	1	0	1	0	0
rural	5	4	52	male	12	140	40	20.4082	0	1	0	0	1	0	1	0	1	1	1	0	1	1	1	1	1	0	0	0	1	0	1	0	0
rural	5	5	54	male	11	140	30	15.3061	0	1	0	0	0	0	1	1	0	1		0	0	0	0	0	0	1	1	1	1	0	1	0	0
urban	1	5	14	female	11	140	30	15.3061	0	0	1	1	1	0	1	0	0	1	0	0	0	1	1	0	1	0	0	1	1	0	0	0	0
urban	4	5	45	male	11	140	40	20.4082	0	1	0	0	1	0	0	0	1	1	0	0	0	1	0	0	1	1	0	0	1	0	0	0	0
rural	5	5	54	male	11	140	22	11.2245	0	1	1	0	1	0	1	0	1	1	0		0	0	0	0	1	0	0	1	1	0	0	0	0
urban	7	5	74	male	11	140	31	15.8163	0	0	1	0	1	0	1	0	0	1	1	0	0	0	1	0	1	0	0	1	0	1	0	0	0
urban	1	5	15	female	11	140	31	15.8163	0	1	0	0	0	0	0	0	0	1	0	1	0	1	0	0	0	0	0	1	1	0	0	0	0
urban	3	5	34	male	11	140	41	20.9184	0	1	0	1	0	0	0	0	0	1	0	1	0	0	0	0	0	0	0	0	0	1	1	0	0
rural	5	5	54	male	11	140	26	13.2653	0	0	0	0	0	0	1	0	0	1	1	0	0	0	0	0	0	0	0	1	1	1	0	0	0
rural	6	5	64	female	11	140	34	17.3469	0	0	0	0	1	0	0	0	0	1	0	1	0	0	0	0	0	0	0	1	1	0	1	0	0
rural	6	5	64	male	11	140	24	12.2449	0	0	1	0	1	0	0	0	0	1	0	1	1	1	1	0	0	0	0	1	1	0	1	0	0
urban	4	5	48	male	11	140	28	14.2857	0	0	0	0	1	0	1	0	0	1	0	1	0	0	0	1	1	0	0	0	0	1	0	0	0
urban	4	5	46	male	11	140	44.5	22.7041	0	1	1	1	0	0	1	0	1	1	1	1		0	1	0	0	0	0	0	0	1	0	0	0
urban	3	5	34	male	11	140	30	15.3061	0	1	1	0	1	0	0	0	0	1	0	0	0	0	0	0	0	0	0	0	1	0	0	0	0
rural	5	5	53	female	11	140	27	13.7755	0	1	0	0	0	0	1	0	0	1	1	0	0	0	0	0	1	0	0	1	0	1	0	0	0
urban	7	5	71	male	11	140	40	20.4082	0	1	1	0	1	0	1	0	1	1	0	1	1	0	1	0	1	0	0	1	0	1	0	0	0
rural	5	5	53	female	11	140	26	13.2653	0	0	0	0	1	0	1	0	0	1	0	1	0	1	1	0	1	0	0	1	1	0	1	1	0
urban	7	5	74	male	11	140	31	15.8163	0	1	0	0	0	0	0	0	0	1		0	0	1	0	0	0	0	0	1	1	0	0	0	0
urban	4	5	47	male	11	140	35	17.8571	0	1	1	1	0	0	1	0	0	1	1	1	0	0	0	0	0	0	0	1	0	1	0	0	0
rural	5	5	53	male	11	140	26	13.2653	0	1	0	0	0	0	0	0	0	1	1	0	1	0	1	0	0	0	0	0	1	0	1	0	0
urban	7	5	74	female	11	140	29.2	14.898	0	0	1	0	1	0	0	0	0	1	0	1	0	0	0	1	0	0	0	0	1	0	0	0	0
urban	7	5	72	female	11	140	26	13.2653	0	0	1	0	1	0	0	0	0	1	1	1	0	1	1	1	1	0	1	0	1	0	0	0	0
urban	2	5	26	female	11	140	25	12.7551	0	1	1	0	1	1	1	0	1	1	0	1	0	1	1	1	1	0	1	1	1	0	1	0	0
urban	4	5	46	female	11	140	32.6	16.6327	0		1	0	1	0	0	0	0	1	1	1												0	0
rural	6	5	63	male	11	140	27	13.7755	0	0	1	0	1	0	1	0	0	1	0	1	0	1	1	0	1	0	0	0	1	0	1	0	0
urban	4	5	45	male	11	140	45	22.9592	0	1	0	1	0	0	1	0	1	1	0	1	0	0	0	0	0	0	0	0	1	1	1	0	0
rural	5	5	53	male	10	140	26	13.2653	0	0	0	0	0	0	0	0	0	1	1	1	0	0	0	0	0	0	0	0	0	1	1	0	0
urban	2	5	26	male	10	140	30	15.3061	0	0	1	1	0	0	0	0	0	1	0	1	0	0	1	1	0	0	0	1	1	0	0	0	0
urban	4	5	48	female	10	140	30	15.3061	0	0	1	1	1	0	1	0	1	1	0	0	0	0	0	0	1	0	1	1	1	1	1	0	0
urban	3	5	33	male	10	140	40	20.4082	0			0	1	0	0	0	0	1	0	0	0	1	1	0	0	0	0	0	0	1	0	0	0
rural	6	5	63	male	10	140	32	16.3265	0	1	1	0	1	0	0	0	0	1	0	1	0	0	1	0	1	0	0	1	1	0	1	0	0
rural	6	5	64	female	10	140	27	13.7755	0	1	1	0	1	0	1	0	1	1	0	0	0	0	1	0	1	0	0	0	1	0	1	0	0
rural	6	5	63	female	10	140	25	12.7551	0	0	1	0	1	0	1	0	1	0		0	0	0	0	0	1	0	0	0	1	0	1	0	0
urban	3	5	34	male	10	140	37	18.8776	0	0	1	0	0	0	0	0	1	0	0	1	0	0	0	0	0	0	0	1	1	1	1	0	0
urban	3	5	34	male	10	140	42.5	21.6837	0	1	0	0	0	0	0	0	0	0		0	0	0	0	0	0	0	0	0	1	1	0	0	0
urban	2	5	24	female	10	140	26	13.2653	0	0	1	0	1	0	0	0	0	1	0	0	0	1	0	0	1	0	0	0	1	0	0	0	0
urban	7	5	72	female	10	140	27	13.7755	0	1	0	1	1	0	1	0	0	1	0	0	0	0	0	0	1	0	0	0	1	0	0	0	0
urban	7	5	71	male	10	140	33.5	17.0918	0	1	1	0	0	0	1	0	0	1	0	1	0	1	1	0	0	0	1	0	0	1	0	0	0
urban	7	5	72	male	10	140	44	22.449	0	0	0	0	0	0	0	0	1	1	0	0	0	0	0	0	0	1	0	0	0	1	0	0	0
urban	7	5	73	female	10	140	30	15.3061	0	0	1	0	0	0	0	0	0	1	0		0	1	1	0	0	0	0	0	0	1	0	0	0
urban	2	5	25	female	10	140	30.8	15.7143	0	0	0	0	0	0	1	0	0	1	0	0	0	0	0	0	0	0	0	1	1	0	0	0	0
urban	1	5	14	male	10	140	30	15.3061	0	0	1	0	1	0	1	0	0	1	1	1	0	1	0	0	1	0	0	1	1	0	0	1	0
urban	4	4	41	male	10	140	23	11.7347	0	0	0	0	1	0	1	0	0	1	0	0	0	0	0	0	1	0	0	0	0	0	0	0	0
urban	2	5	26	female	10	140	32	16.3265	0	1	1	0	1	0	1	0	0	1	0	0	0	1	1	0	1	1	0	1	1	0	0	0	0
urban	1	4	12	female	10	140	27.1	13.8265	0	0	0	0	1	0	0	0	1	1	1	0	0	0	0	0	1	0	0	0	1	0	0	0	0
urban	7	5	72	female	10	140	38	19.3878	0	1	0	0	0	0	1	0	0	1	0	0	0	1	0	0	1	0	1	1	0	0	0	0	0
urban	1	4	13	male	10	140	31	15.8163	0	1	1	1	0	0	1	0	0	1	0	0		0	0	1	1	0	0	1	1	0	0	0	0
urban	4	4	41	male	10	140	35	17.8571	0	0	1	0	0	0	0	0	1	1		1	0	1	0	0	0	0	0	1	0	1	0	0	0
urban	3	4	31	female	10	140	32	16.3265	0	0	1	0	1	0	1	0	1	1	0	1	0	0	1	0	1	0	0	0	1	0	0	0	0
rural	6	4	61	female	10	140	31	15.8163	0	1	0	0	0	0	0	0	0	1	1	1	0	0	0	0	0	0	0	1	1	0	1	0	0
urban	4	4	42	male	10	140	35	17.8571	0	1	0	0	1	0	1	0	0	1	0	1	0	0	0	0	1	0	0	0	1	0	0	0	0
urban	2	4	23	male	10	140	43	21.9388	0	0	0	0	0	0	0	0	0	1	1	1	0	0	0	0	0	0	0	0	1	1	0	0	0
rural	6	4	61	male	10	140	32	16.3265	0	1	0	0	0	0	0	0	0	1	0	1	0	0	0	0	1	1	0	1	1	0	1	0	0
urban	2	5	25	female	10	140	31	15.8163	0	0	0	1	1	0	0	0	0	1	1	0	0	0	1	0	1	0	0	1	0	1	0	0	0
urban	1	4	12	female	10	140	32	16.3265	0	0	0	0	1	0	1	0	0	1	1	1	0	0	0	0	0	0	1	1	1	0	1	0	0
urban	4	4	42	female	10	140	30	15.3061	0	0	0	0	1	0	0	0	1	1	1	1	0	0	0	0	1	0	0	0	1	0	0	0	0
urban	1	5	15	female	10	140	24	12.2449	0	1	1	0	1	0	1	0	1	1	0	1	0	0	1	0	1	1	1	1	1	0	0	0	0
urban	1	4	12	male	10	140	35	17.8571	0	1	0	1	1	1	0	1	0	1	1	1	0	1	1	0	1	1	0	1	1	0	0	1	0
rural	5	4	52	male	10	140	29	14.7959	0	1	0	0	1	0	1	0	0	1	1		0	0	1	0	1	1	0	1	1	0	1	0	0
urban	8	4	82	male	10	140	31	15.8163	0	0	1	0	0	0	1	0	0	1	0	0	0	1	1	0	1	1	0	1	1	1	0	0	0
rural	5	5	53	male	10	140	30	15.3061	0	0	1	1	1	0	0	0	0	1	0	1	1	0	1	1	1	0	0	1	1	0	0	0	0
urban	2	4	22	male	10	140	34	17.3469	0	1	0	1	0	0	1	0	0	1	0	1	0	0	0	1	1	0	0	1	0	1	0	0	0
urban	2	4	22	female	10	140	28	14.2857	0	0	1	0	1	0	1	0	1	1	0	0		0	0	1	1	0	0	1	1	0	1	0	0
urban	2	4	23	male	10	140	29	14.7959	0	1	0	0	1	0	1	0	1	1	1	1	0	1	1	1	1	0	0	0	1	0	0	0	0
urban	2	4	21	male	10	140	40	20.4082	0	1	1	1	0	0	1	0	0	1	0	1	0	0	0	0	1	0	1	1	0	1	0	0	0
urban	8	4	81	male	10	140	30	15.3061	0	1	1	0	1	0	1	0	0	1	1	0	0	0	0	0	0	0	0	1	0	1	0	0	0
urban	8	4	82	female	10	140	30	15.3061	0	0	0	0	0	0	0	0	0	1	0	1	0	0	0	0	1	0	0	1	1	0	0	0	0
urban	2	4	21	female	10	140	40	20.4082	0	0	0	0	0	0	0	0	0	1	0	0	0	0	0	0	0	0	0	1	1	0	0	0	0
urban	2	4	22	female	10	140	34	17.3469	0	0	0	0	1	0	0	0	1	1	1	0	0	0	0	0	1	0	0	0	0	1	0	0	0
rural	5	4	51	female	10	140	25	12.7551	0	1	0	0	1	0	0	1	0	1	1	1	1	1	0	0	1	0	0	0	0	1	1	0	0
urban	1	4	12	male	10	140	35	17.8571	0	1	1	0	0	0	1	0	0	1	1	1	0	1	1	0	0	0	0	0	0	1	0	0	0
urban	1	4	11	male	10	140	36	18.3673	0	1	1	0	1	0	1	0	0	1	0	0	0	0	1	0	0	0	0	0	1	0	0	0	0
urban	4	4	44	female	10	140	27.2	13.8776	0	1	1	0	0	0	1	0	0	1	0	1	0	0	1	1	0	1	0	0	1	1	0	0	0
rural	5	4	51	female	10	140	27	13.7755	0	1	1	0	1	0	1	0	0	1	0	1	1	0	0	0	1	1	0	0	0	1	0	0	0
rural	6	4	62	male	10	140	30	15.3061	0	1	0	0	1	0	1	0	0	0	0		0	1	0	1	0	1	0	0	1	0	0	0	0
urban	4	4	41	female	10	140	27	13.7755	0	1	1	1	1	0	1	0	1	1	0	0	0	1	0		1	1		0	1	0	0	0	0
urban	2	4	21	female	10	140	26	13.2653	0	0	1	0	0	0	0	0	0	1	0	1	1	0	1	1	0	0	0	1	0	1	0	0	0
urban	3	5	34	female	10	140	35	17.8571	0	1	0	0	1	0	1	0	1	1	0	0	0	1	0	0	1	1	0	0	1	0	1	0	0
urban	1	4	12	female	10	140	33	16.8367	0	0	0	0	1	0	0	0	0	0	0	0	0	0	0	0	0	0	0	1	1	0	0	0	0
rural	5	4	52	female	10	140	42	21.4286	0	0	0	0	0	0	0	0	0	1	0	1	0	0	0	0	1	0	0	1	1	1	1	0	0
rural	5	4	52	female	10	140	25	12.7551	0	1	0	0	1	0	1	0	0	1	0	1	1	0	0	0	1	0	0	1	1	0	1	0	0
urban	2	4	23	female	10	140	29	14.7959	0	0	1	0	1	0	1	0	1	1	1	0	0	1	1	0	1	0	0	0	0	1	0	0	0
rural	5	4	52	male	10	140	41	20.9184	0	1	0	0	1	0	1	0	0	0	1	1	1	0	0	0	1	1	1	1	1	0	1	0	0
rural	6	4	62	male	10	140	28	14.2857	0	0	0	0	0	0	0	0	0	1	1	1	0	0	0	0	0	0	1	1	0	1	0	0	0
urban	1	4	13	male	10	140	25.4	12.9592	0	0	1	0	1	1	0	0	0	1	0	0	0	0	0	0	1	0	0	1	1	0	1	0	0
urban	2	4	21	male	10	140	33	16.8367	0	0	0	1	1	0	1	0	1	1	0	1	0	0	0	0	1	0	0	1	0	1	0	0	0
urban	1	4	11	male	10	140	35	17.8571	0	0	1	0	1	1	1	0	0	1	1	0	0	1	1	0	1	0	0	1	1	1	0	0	0
urban	1	4	12	male	10	140	32	16.3265	0	1	0	0	1	0	1	0	0	1	0	1	0	1	0	0	0	0	0	0	1	0	0	0	0
urban	1	5	14	female	10	140	30	15.3061	0	0	1	0	0	0	0	0	0	1	0	0	0	0	0	0	0	0	0	1	0	1	0	0	0
urban	4	4	41	female	10	140	33	16.8367	0	0	0	0	0	0	0	0	1	1	0	0	0	0	0	0	0	0	0	0	1	0	1	1	0
urban	4	4	43	female	10	140	26	13.2653	0	0	1	0	1	0	1	0	0	1	1	1	0	1	0	0	1	0	0	0	0	1	0	0	0
urban	3	4	31	male	10	140	34.5	17.602	0	1	0	0	0	0	0	0	0	1	0	1	0	0	0	0	0	0	0	0	0	1	0	0	0
urban	4	4	44	female	10	140	34	17.3469	0	1	1	0	1	0	1	0	1	1	0	1	0	1	1	0	1	1	1	1	1	0	0	0	0
urban	8	4	81	female	10	140	30	15.3061	0	0	0	0	0	0	0	0	0	1	1	1	0	0	0	0	0	0	0	1	1	1	0	1	0
rural	6	4	62	male	10	140	20	10.2041	0	1	1	0	0	0	1	0	0	1	1	0	0	1	1	1	0	0	0	1	1	0	0	0	0
urban	2	4	22	female	9	140	25	12.7551	0	0	0	0	0	0	0	0	0	1	0	1	0	0	0	0	0	1	0	1	1	0	0	0	0
urban	3	4	31	female	9	140	25	12.7551	0	1	1	0	1	0	0	0	0	1	0	1	0	1	1	0	1	0	1	0	0	1	0	0	0
urban	2	4	23	male	9	140	30	15.3061	0	0	1	0	1	0	1	0	0	1	0	1		0	1	0	1	0	0	1	1	0	0	0	0
urban	4	4	41	male	9	140	29	14.7959	0	1	0	0	1	0	0	0	1	1	0	1	0	0	0	0	0	0	0	1	1	0	0	0	0
urban	4	4	43	female	9	140	35	17.8571	0	1	1	0	1	0	1	0	0	1	1	1	0	0	1	0	0	0	0	0	0	1	0	0	0
urban	2	4	23	male	9	140	30	15.3061	0	0	0	1	1	0	1	0	1	1	0	1	0	1	0	0	1	0	0	1	1	0	0	1	0
urban	8	4	81	female	9	140	40	20.4082	0	0	0	0	1	0	1	0	0	1	1	1	0	0	0	0	1	0	0	1	1	0	0	0	0
rural	6	4	61	female	9	140	36	18.3673	0	1	1	1	0	0	0	0	0	1	0	0	0	0	1	1	0	0	0	1	1	0	1	0	0
urban	1	4	11	male	9	140	41	20.9184	0	0	1	0	1	0	0	0	0	1	0	1	0	1	1	0	1	0	0	0	1	0	0	0	0
urban	8	4	81	female	9	140	30	15.3061	0	1	1	0	0	0	1	0	0	1	1	1	0	0	0	0	0	0	0	0	1	0	0	0	0
rural	6	4	62	female	9	140	30	15.3061	0	0	0	0	0	0	0	0	0	1	0	0	1	1	0	0	0	0	0	1	1	0	1	0	0
urban	4	4	43	male	9	140	27	13.7755	0	0	0	0	0	0	0	0	0	1	0	1	0	0	0	0	0	0	0	0	1	0	0	0	0
urban	3	4	32	male	9	140	35	17.8571	0	0	0	0	1	0	1	0	0	1	0	0	0	1	0	0	0	0	1	1				0	0
rural	5	4	52	male	9	140	28	14.2857	0	1	0	0	1	0	0	0	0	1	1	1	1	0	0	0	1	1	0	1	1	0	1	0	0
rural	6	4	61	male	9	140	25	12.7551	0	1	0	0	0	1	0	0	0	1	1	0	0	1	0	0	0	0	0	1	1	0	0	0	0
urban	1	4	11	female	9	140	31	15.8163	0	0	1	0	0	0	0	0	0	1	0	1	0	0	1	0	0	0	0	0	1	0	0	0	0
rural	5	4	51	male	9	140	22.5	11.4796	0	1	1	0	1	0	0	1	1	1	0	0	1	1	0	0	0	0	1	1	1	1	1	0	0
urban	4	4	44	male	9	140	30	15.3061	0	0	1	0	0	0	0	0	0	1	0	0	0	0	0	0	0	0	0	0	0	1	0	0	0
rural	6	4	61	female	9	140	27	13.7755	0	1	0	0	0	0	0	0	0		0	0	1	1	0	0	1	0	0	0	1	0	0	0	0
urban	1	4	12	female	8	140	36.5	18.6224	0	1	1	0	1	0	1	0	1	1	0	0	0	1	1	0	1	0	0	1	1	0	0	0	0
rural	6	5	63	male	12	140	20	10.2041	0	1	0	1	0	0		0	0	1	0		1	0	0	1	0	0	0	1	1	0	1	0	0
urban	2	4	21	male	9	140.4	31	15.7263	0	1	1	0	1	0	1	0	0	1	0	1	0	1	1	0	0	1	0	1	1	0	0	0	0
urban	7	5	73	female	11	140.5	30	15.1974	0	0	1	0	1	0	0	0	0	1	1	1	0	1	1	1	1	0	0	1	1	0	0	0	0
rural	6	5	63	male	11	141	24	12.0718	0	0	0	0	0	0	1	0	0	1	1	1	1	0	0	0	0	1	0	0	1	0	0	0	0
urban	4	5	47	male	11	141	41	20.6227	0	1	1	1	0	0	0	0	0	1	1	1	0	0	1	0	1	1	1	0	1	0	0	0	0
urban	7	5	72	male	11	141	36	18.1077	0	1	1	0	1	0	0	0	0	1	1	1	0	1	1	1	0	0	0	1	1	0	0	0	0
rural	6	4	61	male	11	141	30	15.0898	0	1	0	0	0	0	0	0	0	1	1	1	1	0	0	0	0	0	0	1	1	0	1	0	0
urban	7	5	74	female	11	141	31	15.5928	0	0	1	0	0	0	1	0	0	1	0	1	0	0	0	0	1	0	0	0	0	1	0	0	0
urban	7	5	73	male	11	141	38.8	19.5161	0	1	1	1	1	0	1	0	1	1	0	1	0	0	0	0	0	0	0	1	1	0	0	0	0
rural	6	5	63	male	11	141	31	15.5928	0	0	1	0	1	0	1	0	0	1	0	1	1	0	0	0	1	1	0	1	1	1	1	1	0
urban	8	5	83	male	11	141	34	17.1018	0	1	1	0	1	0	0	0	0	1	1	1	0	0	0	0	1	0	0	0	1	1	0	0	0
urban	7	5	71	male	11	141	32	16.0958	0	0	0	0	0	0	0	0	0	1	0	0	0	0	0	0	1	0	0	0	1	0	0	0	0
urban	7	5	73	male	11	141	30	15.0898	0	0	0	0	0	0	0	0	0	1	0	0	0	0	1	0	0	0	0	0	0	1	0	1	0
urban	3	4	31	male	11	141	45	22.6347	0	1	0	0	0	0	1	0	0	1	1	1	0	1	0	1	0	0	0	0	1	1	0	0	0
urban	1	5	16	female	11	141	31	15.5928	0	1	1	0	0	0	1	0	0	1	0	1	0	0	0	1	0	0	0	1	1	0	0	1	0
urban	4	5	46	male	11	141	30	15.0898	0	1	1	0	0	0	0	0	0	1	1	1	0		0	1	1	0	0	0	0	1	0	0	0
urban	7	5	74	female	11	141	31	15.5928	0	0	1	0	1	0	0	0	0	1	0		0	0	0	0	1	0	0	0	1	0	0	0	0
urban	7	5	72	female	11	141	25	12.5748	0	0	1	0	1	0	0	0	0	1	0	1	0	0	0	0	0	0	0	0	0	1	0	0	0
urban	7	5	72	male	10	141	40	20.1197	0	1	0	0	0	0	0	0	0	1	1	0	0	0	0	0	0	0	0	0	0	1	0	0	0
rural	6	5	64	female	10	141	28	14.0838	0	1	1	1	1	0	1	0	1	1	0	0	0	1	1	1	1	1	0	1	1	0	1	0	0
urban	2	5	26	male	10	141	32	16.0958	0	1	1	0	1	0	1	1	0		1	1	0	0	1	0	1	0	0	1	1	0	1	0	0
urban	7	5	72	female	10	141	27.5	13.8323	0	0	1	1	1	0	0	0	0	1	0	1	0	0	0	0	1	1	0	1	1	0	0	0	0
urban	7	5	74	male	10	141	34	17.1018	0	0	1	0	0	0	1	0	0	1		0	1	0	1	0	0	0	0	1	0	1	1	1	0
urban	1	4	11	male	10	141	30	15.0898	0	1	0	0	0	0	1	0	0	1	1	1	0	0	0	0	0	0	0	1	0	1	1	0	0
urban	4	4	43	female	10	141	30	15.0898	0	1	0	0	0	0	0	0	0	1	1	1	0	0	0	0	0	0	0	0	0	1	0	0	0
urban	4	4	44	male	10	141	37	18.6107	0	1	1	0	0	0	1	0	1	1	1	1	0	0	1	0	0	0	0	1	1	0	0	0	0
urban	1	5	14	male	10	141	39.3	19.7676	0	1	0	1	1	1	1	0	0	1	1	0	0	1	0	0	1	1	0	1	1	0	0	0	0
rural	6	4	61	female	10	141	36	18.1077	0	1	1	1	1	0	1	0	1	1	1	1	0	0	0	0	1	1	0	1	1	0	1	0	0
urban	8	4	82	male	10	141	32	16.0958	0	0	1	1	1	0	1	0	1	1	0	0	0	0	1	1	1	0	0	0	1	0	1	1	0
urban	1	4	13	male	10	141	30	15.0898	0	1	0	0	1	0	1	0	1	1	0	0	0	1	0	0	1	0	0	0	1	1	0	0	0
urban	4	4	43	male	10	141	25	12.5748	0	1	1	0	1	0	1	0	0	1	1	1	0	0	1	0	1	0	0	0	1	1	0	0	0
urban	4	4	42	female	10	141	25	12.5748	0	0	1	0	0	0	1	0	0	1	1	1	0	0	0	0	0	0	0	0	1	0	0	0	0
urban	4	4	43	male	10	141	25	12.5748	0	1	1	0	1	0	0	0	0	1	1	1	0	1	0	0	1	0	0	0	0	1	0	0	0
urban	8	4	81	female	10	141	29.3	14.7377	0	0	1	0	1	0	0	0	0	1	0	0	0	0	1	0	1	1	1	1	1	0	0	0	0
urban	1	4	13	female	9	141	27.1	13.6311	0	1	0	1	1	0	0	1	0	1	0	0	0	1	1	1	1	0	0	1	1	0	0	0	0
urban	3	4	32	female	9	141	40	20.1197	0	0	0	0	0	0	0	0	0	0	0	1	0	0	0	1	1	1	0	0	1	0	0	0	0
urban	1	4	11	male	9	141	26	13.0778	0	1	1	0	1	0	1	0	1	1	0	0	0	0	1	0	1	0	0	1	1	1	1	0	0
urban	2	4	22	female	9	141	26	13.0778	0	0	0	0	0	0	0	0	1	1	1	0	0	1	0	0	0	0	0	1	0	1	0	0	0
urban	3	4	31	male	9	141	30	15.0898	0	0				0	1	0	0	1	0	1	0	1	1	0	0	0	0	0	0	1	0	1	0
urban	2	4	23	female	9	141	26	13.0778	0	0	0	1	1	0	0	0	0	1	1	0	0	0	0	0	1	0	1	1	1	1	1	1	0
urban	2	4	23	female	9	141	28	14.0838	0	0	1	0	1	0	1	0	0	1	0	1	0	0	1	0	1	0	0	1	1	1	0	0	0
urban	2	4	22	female	9	141	26.5	13.3293	0	0	0	1	1	0	0	0	1	1	1	1	0	0	0	0	1	0	0	1	1	0	0	0	0
urban	2	4	22	female	9	141	34	17.1018	0	0	0	0	1	0	0	0	0	1	0	0	0	0	0	0	0	0	0	0			0	0	0
urban	7	5	74	male	11	142	30	14.878	0	0	1	0	1	0	1	0	1	1	0	0	0	0	1	0	1	0	0	0	1	0	0	0	0
urban	3	5	33	male	11	142	45	22.317	0	1	0	0	1	0	1	0	1	0	0	1	0	0	0	0	0	0	0	1	1	1	0	0	0
urban	3	5	34	male	11	142	36	17.8536	0	1	1	0	1	0	0	0	0	1	0	1	0	0	0	0	0	0	0	1	0	1	0	0	0
urban	1	5	14	male	11	142	40	19.8373	0	1	0	0	1	0	1	0	1	1	0	0	0	0	0	0	0	0	0	1	0	1	0	0	0
urban	4	5	46	male	11	142	40	19.8373	0	0	1	0	1	1	1	0	1	1	1	1	0	1	1	1	1	0	0	0	0	1	0	0	0
urban	1	5	16	female	11	142	32	15.8699	0	1	1	1	1	0	1	0	0	1	0	1	0	1	1	0	1	0	0	1	0	1	1	0	0
rural	5	5	53	male	11	142	31	15.3739	0	0	0	0	0	0	0	0	0	1	1	1	1	0	0	0	0	0	0	1	0	1	0	0	0
rural	6	5	63	male	11	142	28	13.8861	0	0	1	0	1	0	1	0	0	1	0	1	1	1	1	0	1	0	0	1	1	0	0	0	0
urban	1	4	12	male	11	142	31	15.3739	0	0	0	0	0	0	1	0	1	1	1	0	0	0	0	0	0	0	0	0	1	0	0	0	0
urban	4	5	45	female	11	142	29	14.3821	0	1	0	0	1	0	1	0	1	1	1	0	0	1	0	1	1	0	0	0	1	0	0	0	0
urban	3	5	33	male	11	142	32	15.8699	0	0	1	0	1	0	1	0	0	1	0	0	0	0	0	0		1	0	0	0	1	0	0	0
rural	5	5	53	female	11	142	31	15.3739	0	0	1	1	1	0	1	0	0	1	1	1	1	0	1	0	1	0	0	0	1	0	1	0	0
urban	8	5	83	female	11	142	32	15.8699	0	1	1	0	1	0	1	0	0	1	0	1	0	1	1	1	1	0	0	0	1	1	0	0	0
rural	5	5	53	male	11	142	24	11.9024	0	1	1	0	1	0	1	0	0	1	0	1	0	1	1	0	1	0	0	1	1	0	1	1	0
urban	4	5	45	male	11	142	30	14.878	0	0	1	1	1	0	1	0	0	1	0	1	0	0	1	1	1	0	0	0	0	1	0	0	0
urban	1	5	16	female	10	142	32.5	16.1178	0	0	0	0	1	0	0	0	0	1	1	1	0	0	0	0	1	0	0	1	1	0	0	1	0
urban	1	5	15	female	10	142	31	15.3739	0	0	1	0	1	0	1	0	0	1	1	1	0	0	0	0	0	0	0	0	1	1	0	0	0
urban	4	5	45	male	10	142	25	12.3983	0	0	1	0	0	1	1	0	0	1	1	0	0	0	1	0	0	1	0	1	0	0	0	0	0
urban	8	5	84	female	11	142	36	17.8536	0	0	1	0	0	0	0	0	1	1	0	1	0	0	1	0	0	1	0	0	1	0	0	0	0
urban	2	5	24	male	10	142	35	17.3577	0	1	1	0	1	0	1	0	0	1	0	0	0	1	0	1	1	0	0	1	1	0	0	0	0
urban	2	5	25	male	10	142	31.2	15.4731	0	1	0	0	1	0	0	0	0	1	1	1	1	1	0	1	1	0	0	0	1	0	0	0	0
urban	4	5	47	male	10	142	32	15.8699	0	0	0	0	1	0	1	0	0	1		0	0	0	0	0	1	0	0	1	0	1	0	0	0
rural	6	4	61	male	10	142	35	17.3577	0	1	0	0	1	0	0	0	1	1	0		1	0	0	0	0	0	0	1	1	0	1	0	0
rural	6	5	63	male	10	142	33	16.3658	0	0	0	0	0	0	1	0	0	0	1	1	0	1	0	0	1	0	0	1	1	0	1	0	0
urban	2	4	21	male	10	142	27	13.3902	0	1	0	1	0	0	1	0	0	1	1	1	0	0	0	0	0	0	0	0	1	0	0	0	0
urban	2	4	21	male	10	142	32	15.8699	0	0	0	0	1	0	0	0	0	1	0	0	0	0	0	0	1	0	1	1	0	1	0	1	0
urban	3	4	31	female	10	142	31	15.3739	0	1	0	0	1	0	1	0	0	1	0	1	0	1	0	0	1	0	0	1	0	1	0	0	0
urban	1	5	14	female	10	142	28	13.8861	0	0	0	1	0	0	0	0	0	1	0	1		0	0	0	1	0	0	1	1	0	0	0	0
urban	7	5	72	male	10	142	44	21.8211	0	1	1	0	0	0	1	0	1	1	1	1	0	0	0	0	0	0	0	0	0	1	0	0	0
urban	2	4	23	male	10	142	37.6	18.6471	0	0	0	0	0	0	0	0	0	1	0	1	0	1	0	0	1	0	0	0	1	1	0	0	0
rural	6	4	62	female	10	142	26	12.8943	0	1	0	0	0	0	0	0	1	1	0	1	0	0	1	0	0	0	0	1	0	1	0	0	0
urban	3	4	32	female	10	142	35	17.3577	0	0	1	0	0	0	0	0	0	1	0	1	0	0	0	0	0	0	1	1	0	1	0	0	0
urban	3	4	31	male	10	142	25	12.3983	0	0	1	0	1	1	0	0	0	1	0	1	0	0	1	0	1	0	0	1	1	0	1	0	0
rural	5	4	52	male	10	142	36	17.8536	0	1	0	0	0	0	0	0	0	1	0	0	0	0	0	0	1	0	0	1	1	1	0	0	0
urban	3	4	31	male	10	142	40	19.8373	0	1	0	0	1	0	0	0	0	1	1	1	0	0	0	0	0	0	0	0	1	0	0	0	0
urban	4	4	42	male	10	142	29	14.3821	0	0	0	0	0	0	1	0	0	1	0	1	0	0	0	0	0	0	0	1	1	0	0	1	0
urban	3	4	31	female	10	142	35	17.3577	0	0	1	0	1	0	1	0	0	1	0	0	0	0	1	0	1	0	0	1	1	0	1	0	0
urban	4	4	42	female	10	142	26	12.8943	0	1	0	1		0	1	0	1	1	0	0	0	0	0	0	1	0	0	1	0	1	0	0	0
urban	1	4	11	female	10	142	35	17.3577	0	0	1	1	1	0	1	0	0	1	0	1	0	0	1	0	1	1	0	0	1	0	0	0	0
urban	4	4	44	female	10	142	26	12.8943	0	1	0	0	1	0	0	0	1	1	0	1	0	0	0	0	0	0	0	1	0	1	0	0	0
urban	3	4	32	male	10	142	31.5	15.6219	0	0	1	0	0	0	1	0	1	1	0	0	0	0	0	1	0	1	0	1	1	0	0	0	0
urban	4	4	44	female	10	142	29	14.3821	0	0	0	0	1	0	1	0	0	1	1	1	0	0	0	0	1	0	0	0	0	1	0	0	0
urban	4	4	43	female	9	142	35	17.3577	0	0	0	1	0	0	1	0	1	1	1	0	0	0	0	0	0	0	0	1	0	1	0	0	0
urban	8	4	82	male	10	142	24	11.9024	0	1	0	0	1	0	1	0	0	1	0	1	0	0	0	0	0	0	0	0	1	1	0	0	0
urban	3	5	34	male	9	142	30	14.878	0	1	0	1	0	0	1	0	1	1	0	0	0	0	0	0	1	0	0	1	0	1	0	0	0
rural	6	4	62	female	9	142	20	9.91867	0	1	0	0	1	0	1	0	1	1	1	0	1	0	0	0	1	1	0	1	1	0	1	0	0
urban	4	4	44	male	9	142	40	19.8373	0	0	1	0	1	0	1	0	0	1	0	1	0	1	0	0	0	0	0	0	1	0	0	0	0
rural	6	4	62	female	9	142	35	17.3577	0	1	0	0	1	0	1	0	0	1	0	1	1	0	0	0	1	0	0	0	1	0	0	0	0
urban	2	4	23	male	9	142	37	18.3495	0	1	0	1	0	0	0	0	0	1	0	0	0	1	0	0	1	1	0	1	1	0	0	0	0
urban	4	4	44	male	9	142	36	17.8536	0	1	1	0	0	0	0	0	0	1	0		0	0	1	0	0	0	0	1	1	0	1	0	0
urban	8	4	81	male	7	142	38	18.8455	0	0	0	0	0	0	0	0	0	1	0	0	0	0	0	0	0	0	0	0	1	0	0	0	0
urban	1	4	11	male	9	142.3	37	18.2722	0	0	0	0	0	0	0	0	1	1	1	0	0	0	0	0	0	0	0	1	1	0	0	1	0
urban	8	5	83	female	11	142.8	22.5	11.0338	0	1	0	1	1	0	1	0	0	1	0	0	0	1	0	1	1	0	0	1	1	1	0	1	0
urban	4	4	41	male	11	143	26	12.7146	0	1	0	0	1	0	1	0	0	1	0	0	0	1	0	0	0	1	0	0	0	1	0	0	0
urban	2	5	24	female	11	143	29	14.1816	0	0	1	0	1	0	0	0	1	1	1	1	0	1	0	0	0	0	0	1	1	1	0	0	0
urban	8	5	84	female	11	143	47	22.984	0	1	1	0	1	0	1	0	1	1	1	1	0	0	1	1	1	0	0	1	0	1	0	0	0
urban	1	5	15	female	11	143	26	12.7146	0	0	0	1	0	0	0	0	0	1	0	0	0	0	1	1	1	0	0	1	1	0	0	0	0
urban	8	5	83	female	11	143	40	19.5609	0	0	1	0	1	0	0	0	0	1	1	1	0	0	1	0	0	0	0	1	1	1	0	0	0
rural	5	5	53	female	11	143	22	10.7585	0	0	1	0	1	0	0	0	0		0	1	0	0	0	1	1	0	0	0	1	0	1	0	0
urban	2	5	25	male	11	143	31	15.1597	0	0	0	0	1	0	1	0	1	1	0	0	0	0	0	0	0	0	0	1	1	0	0	0	0
rural	6	5	64	female	11	143	41.5	20.2944	0	0	0	1	1	0	1	0	0	1	1	1	0	0	1	0	0	0	0	1	1	0	1	0	0
urban	2	5	26	male	11	143	30	14.6706	0	1	0	0	1	0	1	0	1	1	0	0	0	1	0	1	1	0	0	0	1	0	0	1	0
urban	2	5	26	male	11	143	28	13.6926	0	1	0	0	0	0	1	0	0	1	0	0	0	1	0	0	0	0	0	1	1	0	0	1	0
urban	3	5	34	male	11	143	34	16.6267	0	1	0	0	1	0	0	0	1	1	0	1	0	0	0	0	0	0	0	0	0	1	0	0	0
rural	5	5	54	female	11	143	30.9	15.1108	0	0	0	0	0	0	0	0	0	1	1	1	1	0	0	0	0	0	0	0	1	0	0	0	0
rural	5	5	53	male	10	143	30	14.6706	0	1	0	0	1	0	0	0	0	1	0	0	0	0	0	0	1	1	0	0	0	1	0	0	0
urban	7	5	74	male	11	143	32	15.6487	0	0	1	0	0	0	0	0	0	1	0	1	0	0	1	0	0	0	0	0	1	0	1	0	0
urban	7	5	72	female	10	143	28	13.6926	0	0	0	0	1	0	1	0	1		1	1	0	0	1	0	1	0	0	1	1	0	0	0	0
rural	5	5	54	male	10	143	21	10.2695	0	0	1	0	0	0	0	0	0	1	0	1	0	0	1	0	0	0	0	0	1	0	0	0	0
urban	1	5	16	female	10	143	36	17.6048	0	1	1	0	1	1	1	0	0	1	0	1	0	1	1	1	1	0	1	1	1	0	1	0	0
rural	6	5	63	male	10	143	31	15.1597	0	1	1	0	0	0	0	0	0	1	0	0	0	0	1	0	0	0	0	1	1	0	0	0	0
urban	4	5	46	female	10	143	30	14.6706	0	0	0	1	1	0	1	0	0	1	1	1												0	0
urban	3	5	34	male	10	143	40	19.5609	0	1	0	0	1	0	1	0	1		0	1	0	0	0	0	1	0	0	1	0	1	0	0	0
urban	1	5	15	male	10	143	31	15.1597	0	0	0	0	0	0	0	0	0	1	0	0	0	0	0	0	0	0	0	0	1	0	0	0	0
rural	5	5	53	male	10	143	25	12.2255	0	1	0	0	0	0	0	0	0	1	1	1	1	1	0	0	0	0	0	1	1	1	0	1	0
urban	4	4	44	male	10	143	40	19.5609	0	1	1	0	1	0	1	0	1	1	1	1	0	1	1	0	1	0	0	0	1	0	1	0	0
urban	4	5	47	female	10	143	35	17.1158	0	1	1	1	1	0	1	0	1	1	0	1	0	0	0	0	0	1	0	0	1	0	0	0	0
rural	6	4	62	female	10	143	32	15.6487	0	1	0	0	0	0	0	0	0	0	0	1	0	0	0	0	0	0	0	1	1	0	1	0	0
urban	4	4	41	male	10	143	30	14.6706	0	1	1	1	1	0	1	0	0		0	0		1	0	0	0	0	0	1	0	1	0	0	0
urban	4	4	44	female	10	143	37	18.0938	0	1	0	1	1	0	1	0	1	1	1	1	0	1	0	0	1	0	1	1	0	1	0	0	0
urban	2	4	21	male	10	143	34	16.6267	0	0	0	1	1	0	0	0	0	1	0	1	0	0	0	0	0	0	0	0	0	1	0	0	0
urban	3	4	31	male	10	143	29	14.1816	0	1	0	0	1	0	0	0	0	1	0	0	0	0	1	0	0	0	0	0	0	1	0	0	0
urban	4	4	41	male	10	143	43	21.0279	0	0	0	0	1	0	0	0	0	1	0	0	0	0	0	0	1	0	0	0	1	0	0	0	0
urban	8	4	81	male	10	143	28	13.6926	0	0	1	0	0	0	0	0	1	1	0	0	0	0	0	0	0	1	0	1	1	1	1	0	0
urban	8	5	83	male	10	143	36.5	17.8493	0	1	1	1	1	0	1	0	0	0	0	0	0	1	0	0	1	1	0	0	1	1	0	0	0
urban	1	4	11	female	10	143	31	15.1597	0	0	0	0	1	0	1	0	1	1	0	1	0	1	1	0	1	0	0	0	1	0	0	0	0
urban	2	4	23	male	10	143	36	17.6048	0	0	0	0	0	0	1	0	0	1	0	0	0	0	0	0	0	1	0	0	1	0	1	0	0
urban	3	4	31	male	10	143	28	13.6926	0	1	1	0	1	0	1	0	1	1	0	0	0	0	0	0	1	0	0	1	1	0	0	0	0
rural	5	4	52	female	10	143	30	14.6706	0	1	0	0	1	0	0	0	0	1	0	1	0	0	0	0	0	0	0	1	0	0	0	0	0
urban	8	4	82	male	10	143	40	19.5609	0	0	1	0	1	0	1	0	1	1	0	0	0	0	1	0	1	0	0	1	1	0	0	1	0
urban	4	4	41	female	10	143	33	16.1377	0	0	0	0	1	0	1	0	0	1	0	0	0	0	0	0	1	0	0	0	0	1	0	0	0
urban	2	4	21	female	10	143	38.5	18.8273	0	0	0	0	1	0	0	0	0		0	0	0	0	1	1	0	1	0	0	0	1	0	0	0
urban	4	4	42	male	10	143	33.5	16.3822	0	1	1	0	0	0	0	0	1	1	1	1	0	0	1	0	1	1	0	0	1	0	1	0	0
urban	3	4	31	female	9	143	32	15.6487	0	0	0	0	0	0	0	0	1	1	0	0	0	0	0	1	0	0	0	1	0	1	0	0	0
urban	8	4	82	female	10	143	36	17.6048	0	1	1	0	1	0	1	0	0	1	0	1	0	1	1	1	1	0	0	0	1	0	0	0	0
urban	2	4	23	male	9	143	40.9	20.001	0	0	0	0	0	0	0	0	0	1	0	0		1	1	1	1	0	0	1	1	0	1	1	0
urban	4	4	42	male	9	143	30.5	14.9152	0	0	0	0	0	0	0	0	0	1	0	1	0	0	0	0	0	0	0	0	0	1	0	1	0
urban	8	4	81	female	9	143	30	14.6706	0	1	1	0	0	0	1	0	1	1	0	0	1	1	1	1	1	0	0	1	1	0	0	0	0
urban	8	4	82	female	9	143	30	14.6706	0	0	1	0	1	0	1	0	0	1	1	1	0	0	1	0	1	0	0	0	0	0	0	0	0
urban	8	4	81	male	9	143	29.5	14.4261	0	0	0	0	1	0	1	0	0	1	0	1	0	1	0	0	1	0	1	0	1	1	1	0	0
urban	3	4	32	male	9	143	30	14.6706	0	0	0	0	0	0	1	0	0	1	0	0	0	0	0	0	0	0	0	0	0	1	0	0	0
urban	2	4	23	female	9	143	35	17.1158	0	1	0	1	1	0	1	0	0	1	0	0	0	0	0	1	1	0	0	0	1	0	0	1	0
urban	4	4	42	female	9	143.5	38	18.4535	0	0	1	0	1	0	1	0	0	1	1	1	0	1	1	1	1	0	0	0	0	1	0	0	0
urban	7	5	72	female	11	143.5	31	15.0542	0	0	1	0	1	0	0	0	0	1	1	1	1	0	1	0	1	0	0	1	0	1	1	0	0
urban	3	5	34	male	11	144	48	23.1481	0	0	0	0	0	0	0	0	0	1	1	1	0	0	0	0	0	0	0	1	0	1	1	0	0
urban	2	5	24	female	11	144	30	14.4676	0	1	1	0	1	0	1	0	1	1	0	0	0	1	1	1	1	1	0	0	1	0	0	0	0
urban	8	5	83	female	11	144	43	20.7369	0	0	1	1	1	0	1	0	1	1	0	1	0	1	1	1	1	1	1	0	1	0	0	0	0
urban	8	5	83	male	11	144	31	14.9498	0	1	1	0	1	0	1	0	0	1	0	1	0	1	1	1	1	0	0	0	0	1	0	0	0
urban	4	5	48	female	11	144	30	14.4676	0	1	1	1	1	0	1	0	1	1	0	1	0	1	1	1	1	0	0	1	1	0	0	0	0
rural	5	5	54	female	11	144	31	14.9498	0	0	0	0	1	0	0	0	0	1	1		0	0	0	0	1	0	0	1	1	1	1	0	0
urban	7	5	72	female	10	144	31	14.9498	0	0	1	0	0	0	1	0	0	1	0	0	1	0	0	0	1	0	0	0	0	1	0	0	0
urban	4	5	45	male	10	144	37.1	17.8916	0	1	0	1	0	0	1	0	0	1	1	1	0	1	0	0	0	0	0	1	0	1	0	0	0
urban	4	5	45	female	10	144	30	14.4676	0	0	1	0	1	0	1	0	1	1	0	1	0	1	1	0	1	1	0	1	1	0	0	0	0
urban	7	5	72	male	10	144	30	14.4676	0	1	0	0	0	0	1	0	1	1	0	1	0	1	0	0	1	0	0	1	0	1	0	0	0
urban	4	4	42	female	10	144	34	16.3966	0	0	0	1	0	0	0	0	0	1	0	0	0	0	0	0	1	0	0	0	1	0	0	1	0
urban	8	4	81	male	10	144	35	16.8789	0	0	0	0	1	0	0	0	0	1	1	1	1	1	1	0	1	0	0	1	1	0	0	0	0
urban	8	4	81	female	10	144	35	16.8789	0	0	1	0	0	0	0	0	0	1	0	1	0	0	1	0	0	0	0	0	0	1	0	0	0
urban	4	4	44	female	10	144	25	12.0563	0	1	1	0	0	0	1	0	0	1	0	0	0	1	1	0	0	0	0	1	1	0	1	0	0
urban	4	4	44	male	10	144	30	14.4676	0	1	0	0	1	0	1	0	0	1	0	0	0	0	0	0	0	1	0	0	0	1	0	0	0
urban	4	4	43	female	10	144	33	15.9144	0	1	1	0	1	0	1	0	0	1	1	1	0	1	1	0	1	0	1	0	1	0	0	0	0
urban	4	4	44	male	10	144	36	17.3611	0	0	1	0	1	0	1	0	0	1	0	0	0	1	1	0	1	0	0	1	0	1	0	0	0
urban	2	4	23	female	10	144	30	14.4676	0	0	1	0	0	0	0	0	0	1	0	1	0	0	1	0	1	1	0	0	1	1	0	0	0
urban	4	4	41	female	9	144	36	17.3611	0	1	0	0	0	0	0	0	0	1	0	0	0	0	0	0	0	1	0	0	1	1	0	0	0
urban	8	4	82	female	10	144	36	17.3611	0	0	0	0	0	0	0	0	0	1	1	1		0	0	0	0	0	0	1	1	0	0	0	0
urban	2	4	22	female	9	144	29.4	14.1782	0	1	1	0	1	0	1	0	0	1	0	0		1	0	0	1	0	0	1	1	0	0	1	0
urban	2	4	23	male	9	144	34	16.3966	0	0	0	0	0	0	0	0	0	1	1	1	0	0	1	0	0	0	0	1	1	0	0	0	0
urban	2	4	22	female	9	144	30	14.4676	0	1	0	0	1	0	1	0	0	1	1	1	0	0	1	0	1	0	0	1	1	0	0	0	0
urban	7	5	72	male	11	144	44	21.2191	0	0	1	0	1	0	0	0	0	1	0	1	0	0	1	0	1	0	0	1	1	0	0	0	0
urban	1	5	15	female	12	145	35	16.6468	0	0	1	0	1	0	0	0	1	1	1	1	0	0	1	0	1	0	0	1	1	0	1	0	0
urban	2	5	24	female	12	145	30	14.2687	0	1	0	0	0	0	1	1	0	1	0	0	0	0	0	0	1	1	1	1	1	0	0	0	0
urban	4	5	45	female	11	145	25	11.8906	0	1	0	0	1	0	0	0	0	1	0	0	0	1	0	0	1	0	0	1	0	1	1	0	0
urban	7	5	71	female	11	145	35	16.6468	0	0	0	0	0	0	0	0	0	1	0	0	0	0	0	0	0	0	0	0	1	0	0	1	0
rural	5	5	53	male	11	145	32	15.22	0	1	1	0	1	0	0	0	1	1	0	1	1	0	1	0	1	0	0	0	1	0	0	0	0
urban	4	5	45	female	11	145	38	18.0737	0	0	1	1	1	0	1	0	1	1	0	1	0	0	0	1	1	0	0	0	0	1	0	0	0
urban	2	5	24	female	11	145	40	19.025	0	0	1	0	0	0	0	0	1	1	0	0	1	0	1	1	0	0	0	1	1	0	1	0	0
urban	3	5	33	female	11	145	36	17.1225	0	1	1	0	1	0	1	1	0	1	1	0	0	1	1	0	1	0	0	1	1	0	1	0	0
urban	4	5	45	male	11	145	31.3	14.887	0	1	0	0	1	0	1	0	1	1	0	0	0	1	1	0	1	0	0	0	1	0	0	0	0
urban	2	5	25	male	11	145	40	19.025	0	0	1	0	0	0	0	0	0	1	0	1	0	0	1	0	0	1	0	0	1	0	0	1	0
urban	7	5	71	male	11	145	40	19.025	0	0	1	0	0	0	0	0	1	1	0	0	0	1	1	0	1	0	0	1	1	1	1	1	0
urban	8	5	83	male	11	145	20.9	9.94055	0	0	1	1	1	0	1	0	0	1	0	1	0	1	1	0	1	1	0	1	1	1	0	1	0
rural	5	5	53	male	11	145	30	14.2687	0	1	0	0	0	0	1	0	0		0	1	0	1	1	0	0	0	0	1	1	0		0	0
urban	7	5	72	male	11	145	25	11.8906	0	0	0	0	0	0	0	0	0		0	0	0	1	0	0	0	0	0	1	1	0	1	0	0
urban	1	5	14	female	11	145	30	14.2687	0	0	0	0	1	0	0	0	0	1	1	1	0	0	0	0	1	0	0	1	1	0	0	0	0
urban	4	5	45	male	11	145	35	16.6468	0	0	1	0	0	0	0	0	1	1	0	1	0	0	0	0	1	1	0	1	1	0	0	0	0
rural	6	5	63	female	11	145	45	21.4031	0	1	0	0	1	0	1	0	1	1	0	0	0	1	0	0	1	1	1	0	1	0	1	0	0
rural	5	5	54	female	11	145	34	16.1712	0	0	0	0	0	0	0	0	0	0	1	1	0	0	0	0	0	0	0	0	1	0	1	0	0
rural	5	5	53	male	11	145	34	16.1712	0	1	0	0	0	0	1	0	0	1	0	1	0	1	0	0	0	0	0	1	1	0	0	0	0
urban	7	5	71	female	11	145	32.2	15.3151	0	0	1	0	1	0	1	0	0	1	1	0	0	1	1	0	1	0	0	1	1	0	1	0	0
urban	2	5	26	female	11	145	36	17.1225	0	0	0	0	1	0	0	0	0	1	1	1	0	1	0	0	1	0	0	0	1	0	0	0	0
urban	2	5	25	female	11	145	30	14.2687	0	0	1	0	1	0	1	0	0	1	1	1	0	0	0	1	1	1	0	0	0	1	0	0	0
rural	5	5	54	male	11	145	40	19.025	0	1	0	0	1	0	0	0	1	1	0	1	0	0	1	0	1	0	0	1	1	0	0	0	0
rural	5	5	53	male	11	145	32	15.22	0	1	1	0	1	0	0	0	0	1	0	0	1	0	1	0	0	0	0	1	1	0	0	0	0
rural	6	5	64	female	11	145	34.5	16.409	0	0	0	0	1	0	0	0	0	1	0	0	0	0	0	0	0	0	0	1	1	0	1	0	0
rural	5	5	54	male	11	145	40	19.025	0	1	0	1	1	0	0	0	0	1	1	1	1	0	1	1	1	1	1	1	1	0	0	0	0
urban	1	5	16	male	11	145	32	15.22	0	0	1	0	0	0	0	0	0	1	0	0	0	0	1	0	0	0	0	1	1	1	0	0	0
urban	7	5	71	female	11	145	35	16.6468	0	0	0	0	1	0	1	0	1	1	1	1	0	0	0	0	0	0	1	1	1	1	0	0	0
urban	4	5	47	male	11	145	32	15.22	0	1	1	0	1	1	1	0	1	1	1	1	1	0	0	0	1	0	0	0	1	0	0	0	0
urban	8	5	83	female	11	145	35	16.6468	0	0	1	0	1	0	1	0	0	1	1	0	0	0	1	1	1	0	0	1	1	0	0	0	0
urban	4	5	48	male	11	145	30	14.2687	0	0	0	0	1	0	1	0	0	1	0	1	0	0	0	0	0	0	0	0	0	1	0	0	0
urban	7	5	72	male	11	145	30	14.2687	0	1	1	0	0	0	1	0	0	1	0	1		1	0	0	1	0	0	1	1	0	0	0	0
urban	1	5	14	male	11	145	36.2	17.2176	0	1	0	0	1	0	1	0	0	1	0	1	0	0	0	0	0	0	0	1	1	1	0	0	0
urban	2	5	24	female	11	145	26	12.3662	0	0	1	0	1	0	1	0	0	1	0	1	0	0	1	0	1	0	0	1	1	0	0	0	0
urban	4	5	48	male	11	145	45	21.4031	0	1	1	0	1	1	1	0	0	1	1	1	0	0	0	0	0	1	0	1	0	1	0	0	0
rural	6	4	62	female	11	145	21	9.98811	0	1	0	0	1	0	1	0	1	1	1		1	0	0	0	1	0	0	0	1	0	1	1	0
rural	5	5	53	female	11	145	32	15.22	0	0	0	0	0	0	0	0	1	1	0	1	1	0	1		1	0	0	1	1	0	0	0	0
urban	1	5	15	female	10	145	31	14.7444	0	1	1	0	1	0	1	0	0	1	0	1	0	1	0		0	0	0	1	0	1	0	0	0
urban	4	5	45	female	10	145	27	12.8419	0	0	1	1	1	0	1	0	0	1	0	1	1	0	1	1	1	0	0	1	0	1	0	0	0
urban	1	5	15	male	10	145	37.5	17.8359	0	1	0	0	1	0	1	1	0	1	0	0	0	0	0	0	1	1	0	1	1	0	0	0	0
rural	5	5	53	female	10	145	34	16.1712	0	1	0	1	0	0	1	0	0	1	0	1	1	0	0	0	0	0	0	1	0	1	1	0	0
urban	3	5	33	male	10	145	37	17.5981	0	1	1	0	1	0	1	0	0	1	1	1	0	0	1	0	1	0	0	1	0	1	0	1	0
urban	7	5	74	male	10	145	31	14.7444	0	1	1	0	1	0	1	0	0	1	1	1	0	1	1	0	1	0	0	0	0	1	0	0	0
rural	5	5	54	male	10	145	29	13.7931	0	1	0	0	1	0	0	0	0	1	0	1	0	0	1	0	1	0	0	1	1	0	0	0	0
urban	4	5	47	female	10	145	35	16.6468	0	0	1	0	1	0	1	0	0	1	0	1	0	1	1	1	1	0	0	0	0	1	0	0	0
urban	8	5	83	male	10	145	30	14.2687	0	1	1	1	1	0	1	0	1	1	0	0	1	1	1	1	1	1	0	1	1	0	1	0	0
urban	1	5	15	female	10	145	32	15.22	0	1	0	0	1	0	1	0	0	1	0	1	0	0	0	0	0	0	0	1	1	0	0	0	0
urban	2	4	23	male	10	145	44	20.9275	0	1	0	0	1	0	1	0	0	1	0	0	0	1	0	0	1	0	0	0	1	0	0	1	0
urban	7	5	73	male	10	145	31	14.7444	0	1	1	0	1	0	1	0	0	1	0	1	1	0	1	0	1	0	0	0	0	1	0	0	0
urban	2	5	25	male	10	145	44	20.9275	0	1	0	1	1	0	1	0	1	1	0	0	0	1	1	1	0	0	1	1	1	0	1	0	0
rural	5	5	53	female	10	145	28	13.3175	0	1	0	0	0	0	1	0	0	1	0	0	1	0	1	0	0	1	0	1	1	0	1	1	0
urban	7	5	72	female	10	145	22	10.4637	0	0	1	0	1	0	0	0	0	1	1	1	0	0	0	0	1	0	0	1	1	0	1	0	0
urban	4	4	44	male	10	145	46	21.8787	0	1	1	0	1	0	1	0	1	1	1	1	0	0	1	0	0	0	0	0	1	1	0	0	0
urban	4	4	43	male	10	145	47	22.3543	0	0	0	1	1	0	1	0	1	1	0	1		0	0	0	0	1	0	0	1	1	0	0	0
urban	2	5	26	female	10	145	40	19.025	0	0	0	0	0	0	0	0	0	1	0	0	0											0	0
rural	6	4	61	male	10	145	43	20.4518	0	1	0	0	0	0	0	0	0	1	1	1	0	0	0	0	0	0	0	1	1	1	1	0	0
urban	1	5	14	female	10	145	29.5	14.0309	0	0	1	0	1	0	0	0	0	1	0	0	0	0	0	0	1	1	1	0	1	1	0	0	0
urban	8	4	82	male	10	145	34.5	16.409	0	1	1	0	0	0	1	0	0	1	0	0	0	0	1	0	0	0	0	0	1	0	0	0	0
rural	5	4	52	female	10	145	26.5	12.604	0	1	1	0	1	0	0	0	0	1	0	1	0	1	0	0	0	1	0	1	1	0	1	0	0
urban	4	4	41	female	10	145	30	14.2687	0	0	0	0	0	0	0	0	0	1	0	0		0	0	0	0	0	0	1	1	1	0	0	0
rural	5	4	52	male	10	145	35	16.6468	0	0	0	0	1	0	1	0	0	1	0		0	0	1	0	1	1	0	1	1	0	1	0	0
urban	8	4	81	female	10	145	33	15.6956	0	1	0	0	1	0	1	0	0	1	0	1	0	1	1	0	1	1	0	0	1	0	0	0	0
urban	2	4	23	male	10	145	36	17.1225	0	0	0	0	0	0	0	0	1	1	1	0	0	0	0	0	0	0	0	0	1	0	0	0	0
urban	4	4	42	male	10	145	44	20.9275	0	1	1	0	0	0	0	1	0	1	0	1	0	0	0	0	0	0	1	1	1	0	0	0	0
urban	4	4	44	female	10	145	35	16.6468	0	1	1	1	1	0	1	0	0	1	1	1	0	0	1	1	1	1	0	1	1	1	0	0	0
urban	3	4	32	female	10	145	33	15.6956	0	0	0	0	0	0	1	0	1	1	1	1		0	0	0	0	0	0	0	1	0	0	0	0
urban	8	4	81	female	10	145	30	14.2687	0	0	1	0	0	0	0	0	0	1	0	0	0	0	0	0	0	0	0	0	1	1	0	0	0
urban	1	4	11	male	10	145	42.5	20.214	0	0	1	0	0	0	0	0	1	1	0	1	1	0	0	0	0	1	0	1	1	0	0	1	0
rural	5	4	52	female	10	145	29	13.7931	0	1	0	0	0	0	0	0	1	1	0	1	0	0	0	0	1	0		1	1	0	1	1	0
urban	8	4	82	male	10	145	45	21.4031	0	0	1	1	0	0	0	0	0	1	0	0	0	0	1	0	1	0	0	0	1	0	0	0	0
rural	6	4	61	female	10	145	24	11.415	0	1	0	0	0	0	0	0	0	1	0	0	0	0	0	0	0	1	0	1	1	0	0	0	0
rural	6	4	61	female	10	145	32	15.22	0	1	1	0	0	0	0	0	0	1	1	1	0	0	1	0	1	0	0	1	1	0	0	0	0
rural	5	4	52	male	10	145	25	11.8906	0	1	1		1	0	0	0			0		1	0		0	0	0	0	1	0	1	0	0	0
rural	6	4	61	male	10	145	30	14.2687	0	1	0	1	1	0	0	0	0	1		0	0	0	0	0	0	0	0	1	1	0	0	0	0
urban	2	4	23	male	10	145	32	15.22	0	1	1	0	1	0	0	0	0	1	0	0	0	0	0	0	1	0	0	0	1	0	0	0	0
urban	2	4	23	male	10	145	40	19.025	0	0	0	0	0	0	1	0	0	1	0	1	0	0	0	0	0	0	0	0	0	1	0	0	0
rural	5	4	51	female	10	145	30	14.2687	0	0	0	1	0	0	0	0	0	1	0	1	1	0	0	1	1	1	0	1	1	1	0	0	0
urban	4	4	44	female	10	145	30	14.2687	0	0	0	0	0	1	1	0	0	1	0	0	0	0	0	0	0	0	1	0	0	1	0	0	0
urban	4	4	43	female	10	145	36	17.1225	0	0	1	0	1	0	1	0	0	1	0	0	0	1	0	0	1	0	0	1	0	1	0	0	0
urban	2	4	23	female	10	145	28	13.3175	0	0	1	0	1	0	0	0	0	1	0	0	0	0	0	0	1	1	0	1	1	0	0	0	0
urban	4	4	43	male	10	145	38	18.0737	0	0	0	1	0	0	0	0	0	1	0	1	0	0	0	0	0	0	0	0	1	1	0	0	0
rural	6	4	61	female	10	145	32	15.22	0	1	0	0	0	0	1	0	0	1	0	1	0	1	0	0	0	0	0	0	1	0	0	0	0
urban	2	4	23	male	10	145	37	17.5981	0	0	1	0	1	0	0	0	0	1	0	0	0	1	0	1	1	0	0	0	1	1	0	1	0
urban	3	4	31	male	10	145	40	19.025	0	0	1	0	0	0	0	0	0	1	0	1	0	0	0	0	0	0	1	1	1	0	1	1	0
urban	2	4	22	male	10	145	32	15.22	0	1	1	0	1	0	1	0	1	1	0	1	0	1	1	0	0	0	0	1	1	1	1	0	0
urban	2	4	22	female	10	145	29	13.7931	0	1	0	0	1	0	1	0	0	1	0	1	0	0	0	1	1	0	0	0			0	1	0
urban	8	4	82	female	10	145	27	12.8419	0	0	1	0	1	0	1	0	0	1	0	0	0	0	1	0	1	0	0	1	1	0	0	0	0
urban	3	4	31	male	10	145	40	19.025	0	0	1	0	0	0	0	0	1	1	0	1	0	0	0	0	0		0	1	1	1	0	0	0
urban	8	4	82	female	10	145	33	15.6956	0	0	0	0	0	0	0	0	0	1	1	1	0	0	0	0	0	0	0	0	0	1	0	0	0
urban	2	5	26	male	9	145	31	14.7444	0	0	1	0	1	0	0	0	0	1	1	0	0	1	1	0	0	0	0	1	1	0	0	0	0
urban	1	4	13	female	9	145	29	13.7931	0	1	0	0	1	0	1	0	1	1	1	1	0	0	0	0	1	0	0	0	1	0	1	0	0
urban	2	4	21	male	9	145	40	19.025	0	0	0	1	0	0	0	0	0	0	0	1	0	0	0	0	0	0	0	1	1	0	0	0	0
rural	5	4	51	female	9	145	26	12.3662	0	1	1	0	1	0	0	0	0	0	0	0	0	0	1	0	0	0	0	1	1	0	0	0	0
urban	4	4	44	male	9	145	35	16.6468	0	0	1	0	0	0	1	0	0	1	0	1	0	0	1	0	0	0	0	0	0	1	0	0	0
urban	4	4	41	female	9	145	35	16.6468	0	1	1	0	1	0	0	0	0	1	0	1	0	1	1	0	1	0	1	0	0	1	0	1	0
rural	5	4	51	female	9	145	40	19.025	0	1	0	0	0	0	0	0	0	1	1	1	1	1	0	0	0	0	0	1	1	0	1	0	0
urban	3	4	31	female	9	145	26	12.3662	0	0	0	0	0	0	0	0	0	1	0	1	0	0	0	0	0	0	0	1	1	0	1	0	0
urban	1	4	12	male	9	145	40	19.025	0	1	1	0	1	0	1	0	0	1	1	0	0	1	1	0	1	1	0	0	0	1	0	0	0
urban	4	4	42	male	9	145	40	19.025	0	0	1	0	1	0	0	0	1	1	0	1	0	0	1	0	1	0	0	0	1	0	0	0	0
urban	4	4	42	male	9	145	40.5	19.2628	0	0	0	1	0	0	0	0	0	1	0	1	0	0	0	0	0	0	0	1	1	0	0	0	0
rural	6	4	61	female	9	145	30	14.2687	0	1	0	0	1	0	1	0	0	1	0	1	1	0	0	0	1	0	0	1	1	0	1	0	0
urban	8	4	81	male	9	145	30	14.2687	0	1	0	0	1	0	0	0	0	1	1	1	0	0	0	0	0	1	0	0	1	0	0	0	0
urban	1	4	11	female	9	145	42.9	20.4043	0	1	1	0	0	0	1	0	1	0	0	0	0	1	0	0	1	0	0	0	1	1	1	0	0
urban	1	4	12	male	9	145.2	28.3	13.4231	0	1	1	1	1	0	1	0	1	1	0	0		0	1	0	1	0	0	1	1	0	0	1	0
urban	7	5	74	female	11	145.5	28.5	13.4623	0	0	0	0	0	0	0	0	0	1		1	0	0	1	0	0	0	0	1	0	1	0	0	0
urban	7	5	74	female	11	145.5	39	18.4221	0	1	0	0	0	1	1	0	0	1	0	0	0	0	1	0	0	1	0	0	1	0	0	0	0
urban	7	5	73	female	11	145.5	34	16.0603	0	0	0	0	0	0	0	0	0	1	1	1	0	0	0	0	0	0	0	0	0	1	0	0	0
urban	1	5	15	male	11	146	35	16.4196	0	0	0	0	0	0	0	0	0	1	1	1	0	0	0	0	0	0	0	1	1	0	0	0	0
urban	3	5	33	male	11	146	32.5	15.2468	0	1	0	0	1	0	0	0	0	1	1	0	0	1	0	0	0	0	1	1	1	0	0	1	0
urban	7	5	73	male	11	146	31	14.5431	0	1	0	1	0	0	0	0	0	1	0	1	0	1	1	1	0	0	0	0	0	1	0	0	0
urban	3	5	34	male	11	146	31	14.5431	0	1	0	1	0	0	1	0	0	1	0	0	0	0	0	0	0	0	1	1	1	0	0	0	0
urban	1	5	16	male	11	146	40	18.7652	0	0	0	0	1	0	1	0	0	1	0	0		1	0	0	1	0	0	0	1	0	0	0	0
urban	4	5	46	male	11	146	36	16.8887	0	0	1	0	1	0	1	0	0	1	0	1	0	0	1	0	1	0	0	1	1	0	0	0	0
urban	2	5	24	male	11	146	47	22.0492	0	1	1	1	1	0	1	0	1	1	0	1	0	1	1	0	1	1	1	1	1	0	0	0	0
urban	4	5	48	male	11	146	38	17.827	0	1	1	0	0	0	0	0	0	1	0	0	0	0	1	0	0	0	0	1	1	1	0	0	0
urban	8	5	84	male	11	146	43	20.1726	0	0	1	0	0	0	1	0	0	1	0	0	0	0	1	0	0	0	0	1	1	0	1	0	0
urban	7	5	73	male	11	146	35	16.4196	0	0	1	0	0	1	1	1	1	1		1	0	0	0	0	0	0	0	0	0	1	0	0	0
urban	1	4	14	male	11	146	34.6	16.2319	0	0	0	1	1	1	0	0	0	1	0	1		0	0	1	1	1	0	1	1	0	0	0	0
urban	3	5	33	female	11	146	35	16.4196	0	1	1	0	1	0	0	0	1	1	0	0	0	0	1	1	1	0	0	0	0	1	0	0	0
urban	7	5	73	female	11	146	45	21.1109	0	1	1	0	1	0	1	0	0	1	0	1	0	1	1	1	1	0	0	0	1	0	0	0	0
urban	1	5	15	female	10	146	32	15.0122	0	0	1	0	1	0	0	0	0	1	0	0	0	1	1	1	1	1	0	1	1	0	0	0	0
urban	3	5	34	female	10	146	38	17.827	0	1	1	0	1	0	1	0	0	1	1	1	0	0	1	0	0	0	0	0	1	1	0	0	0
rural	5	5	54	female	10	146	36	16.8887	0	0	1	0	1	0	1	0	0	1	0	0		0	0	1	1	0	0	1	1	0	1	0	0
urban	8	5	84	male	10	146	31	14.5431	0	1	1	0	1	0	0	0	0	1	1	1	0	0	0	0	1	0	0	1	1	0	1	0	0
urban	4	5	48	female	10	146	33	15.4813	0	0	0	0	0	0	0	0	0	1	0	0	0	0	0	0	1	0	0	1	1	0	0	0	0
urban	8	5	83	female	10	146	35	16.4196	0	1	1	1	0	0	1	0	0	1	1	1	0	1	1	0	1	0	0	1	1	0	1	1	0
urban	4	5	46	male	10	146	34	15.9505	0	0	1	0	1	0	0	0	0	1	1	1	0	0	1	1	1	1	1	0	1	0	0	0	0
urban	2	5	24	male	10	146	44	20.6418	0	0	0	0	0	0	0	0	0	1	0	0	0	0	0	0	0	0	0	0	0	1	0	0	0
urban	4	4	41	male	10	146	40	18.7652	0	0	1	1	1	0	1	0	0	1	0	1	0	0	1	0	1	0	0	0	1	1	0	0	0
urban	8	4	82	male	10	146	39	18.2961	0	0	0	0	0	0	1	0	0	1	0	1	0	0	0	0	0	0	0	0	0	1	0	0	0
urban	1	4	11	female	10	146	30	14.0739	0	1	0	0	1	0	1	0	0	1	1	1	0	1	0	0	1	1	0	0	1	0	1	1	0
urban	1	4	13	male	10	146	36	16.8887	0	0	1	0	1	0	1	0	0	1	0	0	0	1	0	0	0	1	0	1	0	1	0	1	0
urban	8	4	82	female	10	146	32	15.0122	0	0	1	0	1	0	0	0	0	1	1	0	0	0	0	1	1	0	0	0	1	0	0	0	0
urban	3	4	32	male	10	146	35	16.4196	0	1	0	1	1	0	1	0	0	1	0	1		1	0	1	1	1	1	1	1	1	1	0	0
urban	8	4	81	female	10	146	25	11.7283	0	1	0	0	1	0	1	0	0	1	1	1	0	0	0	0	1	0	0	0	1	0	0	0	0
urban	2	4	23	female	10	146	34	15.9505	0	1	1	0	1	0	1	0	0	1	0	0	0	1	1	0	0	0	1	1	1	0	1	0	0
urban	2	4	22	male	10	146	36	16.8887	0	1	1	1	1	0	1	0	1	1	1	1	0	0	1	0	1	0	0	1	1	0	1	0	0
urban	2	4	23	female	10	146	23	10.79	0	0	1	0	1	0	0	0	1	0	0	0	0	0	1	0	1	0	0	1	0	1	1	0	0
urban	8	4	82	male	10	146	40	18.7652	0	1	0	0	1	0	0	0	0	1	0	1	0	0	0	0	1	0	0	0	1	0	0	0	0
urban	3	4	32	male	10	146.5	41	19.1033	0	0	1	0	1	0	0	0	0	1	0	0	0	0	1	0	1	0	0	1	1	0		0	0
urban	7	5	74	male	12	147	33	15.2714	0	0	0	0	1	0	0	0	0	1	0	0	0	0	0	0	0	0	1	1	1	0	1	1	0
urban	3	5	34	female	11	147	37	17.1225	0	1	1	0	1	0	1	0	0	1	0	1	0	1	1	1	1	0	0	1	1	0	0	0	0
rural	6	5	63	male	11	147	31	14.3459	0	1	0	0	1	0	1	0	0	1	0		0	1	1	1	1	1	0	1	1	1	0	0	0
urban	3	5	34	male	11	147	45	20.8247	0	1	0	0	1	0	1	1	0	1	0	1	0	0	0	0	1	0	0	0	1	0	0	0	0
urban	3	5	33	female	11	147	35	16.197	0	1	0	0	1	0	1	0	1	1	0	1	0	0	0	0	0	0	0	1	1	0	1	0	0
urban	8	5	83	female	11	147	31	14.3459	0	0	0	0	0	0	0	0	0	1	0	1	0	0	0	1	0	0	0	1	1	1	0	0	0
urban	4	5	48	female	11	147	40	18.5108	0	0	1	0	1	0	1	0	1	1	0	1	0	0	1	0	1	0	0	0	1	0	0	0	0
urban	4	5	48	male	11	147	35.7	16.5209	0	1	1	0	1	0	1	0	0	1	0	0	0	0	1	0	1	0	0	0	0	1	0	0	0
urban	3	5	34	female	11	147	42	19.4363	0	0	1	0	1	0	1	0	0	1	0	0	1	0	1	0	1	0	0	0	0	0	0	0	0
urban	7	5	74	male	11	147	33	15.2714	0	0	1	0	1	0	1	0	0	1	0	1	0	1	0	0	1	0	0	0	0	1	0	0	0
urban	7	5	72	male	11	147	33	15.2714	0	1	1	0	1	1	1	0	0	1	1	1	0	1	0	0	1	0	0	1	1	1	0	0	0
urban	7	5	72	female	11	147	43.2	19.9917	0	0	1	1	1	0	1	0	0	1	1	1	0	1	1	1	1	0	0	1	1	0	1	0	0
urban	8	5	83	female	11	147	49	22.6757	0	0	0	0	0	0	0	0	0	1	1	1	0	0	0	1	1	1	1	1	1	1	0	0	0
urban	7	5	71	male	11	147	44.7	20.6858	0	1	1	1	0	0	0	0	0	1	0	1	0	0	0	0	0	0	0	0	1	0	0	0	0
urban	7	5	74	female	11	147	39	18.048	0	0	1	0	1	0	1	0	0		1	1	0	1	1	0	1	0	0	0	1	0	0	0	0
urban	7	5	72	female	11	147	36	16.6597	0	0	1	0	1	0	0	0	1	1	0	0	0	1	1	0	1	0	0	0	1	0	1	0	0
urban	1	5	14	female	11	147	35	16.197	0	1	1	0	1	0	1	0	0	1	1	0	0	1	1	0	1	0	1	0	1	0	0	0	0
urban	4	5	45	female	11	147	32	14.8086	0	1	0	0	1	0	0	0	0	1	1	1	0	1	0	0	0	0	1	0	1	1	0	0	0
rural	6	5	63	male	11	147	34	15.7342	0	0	1	0	1	0	1	0	0	1	0	0	0	0	1	0	1	0	0	1	1	0	0	0	0
urban	2	5	26	female	10	147	33.5	15.5028	0	0	0	0	0	0	0	0	1	1	0	1	0	0	0	1	0	0	0	1	1	0	0	0	0
rural	6	4	61	male	10	147	42	19.4363	0	0	0	0	0	1	1	0	0	1	1	1	0	1	0	0	0	1	0	0	1	0	0	1	0
urban	7	5	72	male	10	147	46	21.2874	0	0	0	0	1	0	0	0	0	1	0	0	1	0	0	0	1	0	0	1	0	1	0	0	0
urban	4	5	48	female	10	147	42	19.4363	0	0	0	0	0	0	0	0	0	1	0	0	0	0	0	0	0	0	0	0	0	1	1	0	0
rural	6	5	64	female	10	147	29.5	13.6517	0	1	0	0	1	0	1	0	0	1	1	1	1	0	0	0	1	0	0	0	1	0	0	0	0
urban	3	4	31	female	10	147	45	20.8247	0	0	1	0	1	0	0	0	0	1	0		0	0	1	1	1	0	0	0	1	0	0	0	0
urban	1	4	13	female	10	147	45	20.8247	0	1	0	0	1	0	0	0	0	1	0	0	0	0	0	0	0	0	0	1	1	0	1	0	0
urban	4	4	41	female	10	147	38	17.5853	0	0	0	0	0	0	1	0	0	1	0	0	0	0	0	0	1	0	0	1	1	1	0	1	0
urban	8	4	81	female	10	147	45	20.8247	0	0	0	0	1	0	1	0	0	1	0	0	0	0	0	0	1	0	0	0	0	1	0	0	0
urban	4	4	44	female	10	147	40	18.5108	0	0	1	0	1	0	1	0	0	1	0	1	0	0	0	0	0	0	0	1	1	0	0	0	0
rural	5	4	51	male	10	147	45	20.8247	0	0	0	0	1	0	0	0	0	1		1	0	0	1	0	1	1	0	1	1	0	0	0	0
urban	3	4	32	female	10	147	38	17.5853	0	0	1	0	1	0	1	0	0	1		1	0	0	0	1	0	0	0	0	1	0	0	0	0
rural	6	4	61	female	10	147	33	15.2714	0	1	0	1	0	0	0	0	0	1	0	0	0	0	0	0	0	0	0	0	1	0	0	0	0
urban	1	4	13	male	10	147	26	12.032	0	0	0	0	0	0	1	0	0	1	1	1	0	0	0	0	0	0	0	1	1	0	1	0	0
urban	2	4	21	male	10	147	40	18.5108	0	0	0	0	1	0	0	0	0	1	1	1	0	1	0	0	1	0	1	1	1	1	1	0	0
rural	5	4	51	female	10	147	40	18.5108	0	0	1	0	1	0	1	0	1	1	0	1	1	0		1	1	1	1	1	1	0	1	0	0
urban	4	4	41	male	10	147	27	12.4948	0	0	0	0	1	0	1	0	1	1		0	0	0	0	0	0	1	0	0	0	1	0	0	0
urban	4	4	41	male	10	147	36	16.6597	0	0	1	0	0	1	0	0	0	1	1	1	0	0	1	1	1	1	0	0	1	0	1	0	0
urban	4	4	44	male	10	147	40	18.5108	0	1	0	1	1	0	0	0	1	1	0	0	0	0	1	1	0	0	0	0	0	1	0	0	0
urban	2	4	23	male	9	147	37	17.1225	0	0	0	0	0	0	1	0	0	1	1	0	0	1	0	0	0	0	0	0	1	1	0	0	0
urban	4	4	43	male	9	147	35	16.197	0	0	1	0	1	0	1	0	0	1	1	1	0	0	1	0	0	0	0	1	0	1	1	0	0
urban	4	4	42	female	9	147	29	13.4203	0	1	1	1	1	0	1	0	1	1	0	1	0	0	0	0	1	0	0	0	1	0	0	0	0
urban	8	4	81	female	11	147	35	16.197	0	0	0	0	1	0	0	0	0	1	1	1	0	0	0	0	0	0	0	1	1	0	1	0	0
urban	2	5	25	male	11	148	38	17.3484	0	1	0	0	0	1	1	0	0	1	1	0	0	0	0	0	1	0	0	1	1	0	0	0	0
urban	4	5	48	female	11	148	32	14.6092	0	0	0	0	1	1	1	1	0	1	1	1	0	1	1	0	1	0	0	0	1	1	0	0	0
urban	7	5	74	male	11	148	32	14.6092	0	1	0	0	1	0	0	0	0	1	0	0	0	1	0	0	0	0	0	0	0	1	0	1	0
urban	7	5	72	female	11	148	36	16.4354	0	1	0	0	1	1	1	1	0	1	1	1	0	0	1	0	1	0	0	1	1	0	0	0	0
urban	7	5	74	female	11	148	33	15.0657	0	1	0	1	1	0	1	0	1	1	1	1	0	1	0	0	1	0	0	1	0	1	1	0	0
rural	5	5	53	male	11	148	36	16.4354	0	1				0	1	0	0		0	1	0	1	1	0	0	0	0	1	1	0	0	1	0
urban	2	5	24	male	11	148	40	18.2615	0	0	1	0	0	0	0	0	0	1	0	1	0	0	0	0	0	0	1	1	1	0	0	1	0
urban	1	5	14	female	11	148	32	14.6092	0	0	1	0	1	0	1	0	0	1	1	1	0	1	1	1	1	0	0	0	1	0	0	0	0
urban	2	5	24	female	11	148	36	16.4354	0	0	0	1	1	0	1	0	0	1	0	0	0	0	1	1	1	0	0	1	1	1	0	0	0
urban	7	5	72	male	11	148	37	16.8919	0	0	0	0	0	0	0	0	0	1	0	1	0	0	0	0	0	0	0	0	0	1	0	0	0
urban	7	5	71	female	11	148	32	14.6092	0	1	0	1	1	0	1	0	0	1	0	0	0	1	0	1	1	1	0	1	0	1	0	0	0
urban	1	5	15	female	11	148	43.5	19.8594	0	0	0	0	0	0	0	0	0	1	1	0	0	0	0	0	0	0	0	1	1	0	0	1	0
urban	1	5	15	male	11	148	37	16.8919	0	1	0	0	1	0	1	0	0	1	0	1	0	0	0	0	1	0	0	1	0	1	0	0	0
urban	7	5	71	female	11	148	30	13.6961	0	0	1	0	1	0	1	0	0	1	1	0	0	0	0	0	1	0	0	0	1	1	0	0	0
urban	7	5	71	male	11	148	39	17.805	0	1	0	0	1	0	1	0	0	1	0	0	1	1	0	0	1	1	0	0	1	1	0	1	0
urban	1	5	15	male	11	148	35	15.9788	0	1	1	1	0	1	1	1	0	1	1	0	0	0	0	0	0	0	0	1	1	0	1	0	0
urban	2	5	24	female	11	148	36	16.4354	0	1	1	0	1	0	1	0	1	1	0	0	0	1	1	1	1	0	0	0	0	1	0	0	0
urban	2	5	25	female	11	148	38	17.3484	0	0	1	1	1	0	0	0	0	1	0	1	0	0	1	0	1	0	1	1	1	0	0	0	0
rural	6	5	64	male	10	148	45	20.5442	0	0	0	0	0	0	0	0	0	1	0	0	0	0	0	0	0	0	0	0	1	0	0	0	0
rural	5	5	53	female	10	148	25	11.4134	0	1	1	0	1	0	0	0	0	1	0		1	0	1	0	1	0	0	1	1	1	0	0	0
urban	7	5	74	female	10	148	36	16.4354	0	0	1	0	0	0	0	0	1	1	1	1	0	0	1	0	0	0	0	0	1	0	0	0	0
urban	2	5	25	female	10	148	38	17.3484	0	1	1	0	1	0	1	0	1	1	0	1	1	1	1	0	0	0	0	1	0	1	0	0	0
urban	7	5	72	male	10	148	37	16.8919	0	1	1	1	1	1	1	0	1	1	0	0	0	1	1	1	1	1	1	1	1	0	0	0	0
urban	2	5	26	male	10	148	31	14.1527	0	1	0	0	0	0	1	0	0	1	0	0	0	0	0	0	0	0	0	1	1	0	0	0	0
urban	7	5	71	female	10	148	43.5	19.8594	0	1	1	0	1	0	1	0	1	1	0	0	0	1	1	0	1	1	0	0	1	0	1	0	0
urban	4	5	45	male	10	148	34	15.5223	0	1	1	0	1	0	1	0	0	1	0	1	0	1	0	0	1	0	0	0	1	1	0	0	0
urban	3	5	33	male	10	148	40	18.2615	0	0	0	0	0	0	0	0	0	1	0	1	0	0	0	0	0	0	0	0	1	0	0	1	0
urban	8	5	84	female	10	148	41.6	18.992	0	1	1	1	1	0	1	0	0	1	0	1	0	1	1	1	0	1	0	1	1	1	0	0	0
urban	3	4	31	male	10	148	32	14.6092	0	1			1	1	0	0	1	1	1	0	0	1	0	0	1	1	0	1	1	0	1	0	0
urban	8	4	82	female	10	148	36.5	16.6636	0	0	1	0	1	0	1	0	0	1	0	0	0	0	0	1	1	0	0	1	1	0	0	0	0
urban	2	4	21	male	10	148	32	14.6092	0	0	1	0	1	0	1	0	0	1	0	1	0	0	1	0	0	0	0	1	1	0	0	0	0
urban	1	4	12	male	10	148	40	18.2615	0	1	0	0	1	1	1	0	0	1	0	0	0	0	0	0	0	0	0	0			0	0	0
urban	3	4	31	female	10	148	32.5	14.8375	0	0	0	0	0	0	0	0	0	1	0	0	0	1	0	0	0	0	0	1	1	0	0	0	0
urban	8	4	81	male	10	148	40	18.2615	0	0	0	0	0	0	1	0	0	1	1	1	0	0	0	0	0	0	0	1	0	1	0	0	0
urban	3	4	31	male	10	148	37.5	17.1202	0	0	1	1	1	0	1	0	0	1	0	1	0	0	1	1	1	0	0	0	1	0	0	0	0
urban	2	4	23	male	10	148	35	15.9788	0	0	0	0	0	0	0	0	0	1	0	0		0	0	0	0	0	0	1	1	0	0	0	0
urban	4	4	44	female	10	148	38.9	17.7593	0	0	1	0	1	0	1	0	1	1	1	1	0	0	1	0	1	0	0	1	0	1	0	0	0
urban	8	4	81	male	10	148	34	15.5223	0	0	1	0	0	0	1	0	1	1	0	0	0	1	0	0	0	0	0	0	1	1	0	0	0
urban	4	4	42	male	10	148	35	15.9788	0	0	1	0	0	0	1	0	0	1	1	1	0	0	0	0	0	0	0	0	1	1	0	0	0
urban	3	4	32	male	10	148	42	19.1746	0	0	0	0	1	0	1	0	0	1	0	1	0	0	0	0	0	0	0	0	1	0	0	0	0
rural	6	4	62	male	10	148	35	15.9788	0	1	1	0	1	0	0	0	0	1	0	0	0	1	0	0	0	0	0	1	1	0	0	1	0
urban	2	4	21	male	10	148	34	15.5223	0	0	1	0	0	0	0	0	0	1	0	1	0	0	0	0	0	0	0	0	0	1	1	0	0
urban	4	4	43	female	10	148	32.1	14.6549	0	1	1	0	1	0	1	0	0	1	1	0	0	0	0	0	0	0	0	0	1	0	0	0	0
urban	3	4	32	male	10	148	35	15.9788	0	0	1	0	0	0	0	0	0	1	0	1	0	1	0	0	0	0	0	1	0	1	0	0	0
urban	2	4	22	female	9	148	32	14.6092	0	1	0	0	0	0	1	0	0	1	1	0	0	1	1	0	1	1	0	1	1	0	0	0	0
urban	8	4	81	male	9	148	35	15.9788	0	0	1	0	1	0	1	0	0	1	1	1	0	0	1	1	1	1	0	1	1	0	0	0	0
urban	8	4	81	male	9	148	44	20.0877	0	1	1	0	1	0	1	0	0	0	0	1	0	1	1	0	1	0	0	1	1	0	1	0	0
urban	4	4	42	male	9	148	36	16.4354	0	1	1	0	1	0	1	0	0	1	1	1	0	0	1	0	1	0	0	0	1	0	0	0	0
urban	4	4	42	male	9	148	34	15.5223	0	0	1	0	1	0	1	0	0	1	0	0	0	0	1	0	0	0	0	0	1	1	0	0	0
urban	2	4	23	female	9	148	42	19.1746	0	1	0	1	1	0	1	0	0	1	1	1	0	0	0	0	0	0	0	1	1	1	1	0	0
rural	6	4	61	male	9	148	34	15.5223	0	1	0	0	0	0	1	0	0	1		0	1	1	0	0	0	0	0	0	0	1	1	0	0
urban	7	5	71	male	11	148.5	45	20.4061	0	1	0	0	1	0	1	0	1	1	0	1	0	1	1	0	1	0	1	1	1	0	0	0	0
urban	7	5	71	male	11	149	31	13.9633	0	0	0	1	0	0	0	0	0	1	1	1	1	0	0	0	1	0	0	0	0	1	1	0	0
urban	4	5	45	male	11	149	45	20.2694	0	0	0	0	1	0	1	0	0	1	0	0	0	0	0	0	1	0	0	0	0	1	0	0	0
urban	7	5	74	female	11	149	43	19.3685	0	1	1	0	1	0	1	0	1	1	1	1	0	1	1	0	1	0	0	0	1	0	1	0	0
urban	3	5	34	female	11	149	36	16.2155	0	1	0	0	0	0	0	0	0	1	0	0	0	0	0	0	0	0	0	0	0	1	0	0	0
rural	6	5	63	female	11	149	39	17.5668	0	0	1	0	1	0	1	0	0	1	0	0	1	1	1	1	1	0	0	1	1	0	1	0	0
urban	3	5	34	female	11	149	33	14.8642	0	0	1	0	1	0	1	0	0	1	0	1	0	1	1	0	1	1	0	1	1	0	0	1	0
urban	4	5	46	female	11	149	34	15.3146	0	0	0	0	1	0	1	0	0	1	0	1	0	0	0	0	0	0	0	1	0	1	0	0	0
urban	1	5	16	female	11	149	32	14.4138	0	0	1	0	0	0	1	0	1	1	1	1	0	1	1	1	1	0	0	0	0	1	0	0	0
urban	1	5	14	female	11	149	33	14.8642	0	0	1	0	0	0	0	0	1	1	0	0	0	0	0	0	1	0	0	0	1	0	0	0	0
urban	3	5	34	female	11	149	50	22.5215	0	1	0	0	1	0		0	0	1	0	1	0	0	0	0	0	0	0	1	0	1	0	0	0
urban	1	5	15	male	11	149	42	18.9181	0	1	1	1	1	0	1	0	0	1	0	0	0	1	0	1	0	0	0	0	0	1	0	0	0
rural	5	5	53	female	11	149	45	20.2694	0	1	0	0	0	0	1	0	1	1	0	0	0	1	0	0	1	1	0	1	1	0	0	0	0
urban	2	5	25	male	11	149	42	18.9181	0	1	1	1	1	0	1	0	1	1	0	0	0	1	1	0	1	0	0	1	1	0	1	0	0
urban	4	5	47	male	11	149	32.5	14.639	0	1	0	1	1	0	1	1	0	1	1	1	0	1	0	0	1	0	1	0	1	1	0	0	0
urban	1	4	13	female	11	149	40	18.0172	0	1	1	0	0	0	1	0	0	1	0	1	0	1	1	0	1	0	0	1	1	0	1	0	0
urban	8	5	84	female	11	149	40	18.0172	0	1	1	0	0	0	0	0	0	1	0	0	0	1	0	0	0	0	0	0	0	1	1	0	0
rural	6	5	64	female	11	149	39	17.5668	0	0	0	0	1	0	0	0	1	1	1	1	1	0	1	0	1	0	0	0	1	0	0	0	0
rural	5	5	53	male	10	149	36	16.2155	0	0	1	1	1	0	0	0	0	1	0	0	1	0	0	1	0	0	0	0	1	0	1	0	0
urban	8	5	84	female	10	149	35	15.7651	0	0	1	0	0	0	0	0	0	1	0	1	1	0	1	0	0	0	0	1	1	1	1	0	0
urban	8	5	84	male	10	149	33	14.8642	0	1	0	1	1	1	1	0	0	1	0	0	0	1	0	0	1	0	0	0	0	1	0	0	0
urban	4	5	48	male	10	149	39	17.5668	0	1	1	1	1	0	1	0	1	1	0	1	0	1	1	0	1	0	0	1	1	0	0	0	0
urban	1	5	14	male	10	149	43	19.3685	0	0	1	0	1	0	0	0	0	1	1	1	0	0	1	1	1	0	0	1	1	1	0	0	0
urban	4	5	45	female	10	149	31	13.9633	0	1	0	1	1	0	1	0	0	1	0	1	0	0	0	0	0	0	0	1	0	1	0	0	0
urban	3	5	34	female	10	149	37	16.6659	0	1	1	1	0	0	1	0	0	1	0	0	0	0	0	0	0	0	0	1	1	0	0	0	0
urban	7	5	73	female	10	149	35	15.7651	0	0	1	0	0	0	0	0	0	1	1	1	1	0	1	0	1	0	0	1	1	0	0	1	0
urban	4	4	43	male	10	149	46	20.7198	0	1	0	0	1	0	1	0	0	1	0	1	0	0	0	0	0	0	0	0	0	1	0	1	0
urban	1	4	11	male	10	149	35	15.7651	0	1	1	1	1	0	1	0	0	1	0	0	1	0	0	0	0	1	0	0	1	0	0	1	0
urban	8	4	82	male	10	149	32.4	14.5939	0	0	0	0	1	0	1	0	0	1	0	1	0	1	0	0	0	0	0	0	0	1	0	0	0
urban	1	4	11	male	10	149	35	15.7651	0	0	1	0	0	0	0	0	0	1	0	1	0	0	0	0	0	0	0	0	1	0	0	0	0
urban	2	4	21	female	10	149	35	15.7651	0	0	0	1	1	0	1	0	1	1	0	0	0	0	0	0	0	0	0	1	1	0	0	0	0
urban	2	4	22	female	10	149	32	14.4138	0	1	0	1	1	0	1	0	0	1	1	1	0	0	1	0	1	0	0	1	1	0	0	0	0
urban	8	4	82	male	10	149	37	16.6659	0	0	0	1	1	0	0	0	0	1	0	0	0	1	0	0	0	0	0	0	1	1	1	0	0
urban	1	4	12	male	10	149	45	20.2694	0	0	1	0	1	0	1	0	1	1	1	1	0	0	1	0	1	0	0	1	1	0	0	0	0
urban	1	4	12	female	10	149	38	17.1163	0	0	0	0	1	0	0	0	0	1	1	1	0	0	0	0	0	0	0	0	1	0	0	0	0
urban	2	4	21	male	9	149	35	15.7651	0	0	0	0	0	0	0	0	0	1	0	1	0	0	0	0	0	1	0	1	1	0	0	0	0
urban	4	4	42	male	9	149	40	18.0172	0	1	1	1	1	0	1	0	1	1	0	0	0	0	0	0	0	0	0	1	1	0	0	0	0
urban	7	5	73	male	11	149	33.5	15.0894	0	1	1	0	0	0	1	0	1	1	1	0	0	1	0	0	1	0	0	0	1	0	0	0	0
rural	5	5	53	female	12	150	44	19.5556	0	1	0	0	1	0	0	0	0	1	0	1	0	0	0	0	1	0	0	0	0	1	0	0	0
urban	2	5	26	male	12	150	45	20	0	1	0	0	1	0	1	0	1	1	0	1	0	1	0	0	1	0	0	1	1	1	0	1	0
urban	8	5	84	male	11	150	40	17.7778	0	0	0	1	1	0	0	0	0	1	0	0	0	0	0	0	0	1	0	0	0	1	0	0	0
urban	8	5	84	male	11	150	36	16	0	0	0	0	0	0	0	0	0	1	1	0	0	0	0	0	0	0	0	0	1	1	0	0	0
urban	1	5	16	male	11	150	30	13.3333	0	0	0	1	0	0	0	0	0	1	0	0	0	1	0	0	0	0	0	0	0	1	0	0	0
urban	8	5	83	female	11	150	38	16.8889	0	0	0	0	1	0	0	0	0	1	0	1	0	0	0	1	0	0	0	0	0	1	0	0	0
urban	2	5	26	male	11	150	32	14.2222	0	0	1	0	1	0	1	0	0	1	0	1	0	0	0	0	0	0	0	0	0	1	0	0	0
rural	5	5	54	male	11	150	39	17.3333	0	0	1	0	0	0	0	0	1	1	1	1	0	0	1	0	0	1	0	1	1	0	0	0	0
urban	2	5	24	female	11	150	30	13.3333	0	1	0	0	0	0	0	0	1	1	1	1	0	1	0	0	0	1	0	1	1	1	0	0	0
urban	4	5	45	female	11	150	40	17.7778	0	0	1	0	1	0	0	0	0	1	0	0	0	0	0	1	1	0	0	0	1	0	0	0	0
rural	5	5	54	male	11	150	32.5	14.4444	0	1	0	0	0	0	1	0	1	1	0	0	1	0	0	0	0	0	0	1	1	0	0	0	0
urban	2	5	25	female	11	150	45	20	0	1	1	1	1	0	1	0	1	1	0	0	0	1	1	1	1	0	1	1	1	0	0	1	0
urban	7	5	71	male	11	150	23	10.2222	0	0	0	0	0	0	0	0	0	1	0		0	0	0	0	0	0	0	0	0	1	0	0	0
rural	5	5	53	female	11	150	50	22.2222	0	1	1	1	1	0	0	0	0	1	1	1	0	0	0	0	0	0	0	1	0	1	0	1	0
urban	4	5	45	male	11	150	51	22.6667	0	1	0	0	1	0	1	0	1	1	0	0	0	0	0	0	1	0	0	0	0	1	0	0	0
urban	2	5	25	female	11	150	40	17.7778	0	0	0	0	1	0	0	0	0	1	0	0	0	0	0	0	0	0	1	1	1	0	0	0	0
urban	2	5	25	female	11	150	37	16.4444	0	0	0	0	0	0	0	0	1	1	1	0	0	0	0	0	1	0	0	1	1	0	0	1	0
urban	8	5	83	male	11	150	45	20	0	1	0	0	1	0	0	0	0	1	0	1	0	1	0	0	1	0	0	0	1	0	0	1	0
urban	7	5	73	male	11	150	43	19.1111	0	0	1	0	0	0	0	0	0	1	0	1	0	0	1	0	0	0	0	1	0	1	0	0	0
urban	1	5	15	male	11	150	36	16	0	1	1	1	1	0	0	0	0	1	0	1	0	0	1	1	1	0	0	1	0	1	0	0	0
urban	8	5	83	male	11	150	32	14.2222	0	0	1	0	1	0	1	0	1	1	1	1	0	1	0	0	1	0	0	1	0	1	1	0	0
urban	2	5	26	male	11	150	50	22.2222	0	0	0	0	1	0	0	0	0	1	0	0	0	0	0	0	0	0	1	1	1	0	0	0	0
urban	4	5	46	male	11	150	35.2	15.6444	0	0	1	0	0	0	0	0	1	1	0	0	0	0	0	0	0	1	0	0	1	0	0	0	0
urban	3	5	33	male	11	150	31	13.7778	0	0	0	0	1	0	1	0	0	1	1	1	0	0	0	0	0	0	0	0	1	0	0	0	0
urban	7	5	71	female	11	150	30	13.3333	0	0	0	0	1	0	0	0	0	1	0	0	0	0	0	0	0	1	0	0	1	0	0	0	0
urban	8	5	84	female	11	150	40	17.7778	0	0	0	0	0	0	0	0	0	1	0	0	1	0	0	0	0	1	0	1	1	0	0	0	0
urban	2	4	22	female	11	150	40	17.7778	0	1	0	0	0	0	1	0	0	1	0	0	0	0	0	0	0	0	0	1	1	0	1	0	0
rural	5	4	51	male	11	150	40	17.7778	0	1	0	0	0	0	0	0	0	1	0	0	0	0	0	0	0	0	0	1	1	0	0	1	0
urban	8	5	84	male	11	150	36	16	0	1	1	0	1	0	1	0	0	1	0	1	0	1	1	0	1	0	0	1	0	1	0	0	0
urban	2	5	25	male	11	150	43	19.1111	0	1	1	1	0	0	1	0	1	1	0	0	0	0	0	1	1	0	1	1	1	0	1	0	0
urban	7	5	74	female	11	150	30	13.3333	0	0	0	0	0	0	0	0	0	1	1	1	0	0	0	0	0	0	0	0	1	1	0	0	0
urban	7	5	72	male	11	150	45.6	20.2667	0	0	1	0	1	0	0	0	0	1	1	1		0	1	0	1	0	0	0	0	1	0	0	0
urban	1	5	14	female	11	150	30	13.3333	0	0	0	0	0	0	1	0	1	1	0	1	0	0	0	0	0	0	1	1	1	0	0	0	0
urban	3	5	33	female	11	150	39	17.3333	0	1	1	1	1	0	1	0	1	1	0	0	0	1	0	0	1	0	0	1	1	0	0	0	0
urban	7	5	74	male	11	150	33	14.6667	0	0	1	0	1	0	1	0	0	1	0	0	0	0	1	0	1	0	0	0	0	1	0	0	0
urban	1	4	13	female	11	150	30	13.3333	0	1	1	0	1	0	1	0	0	1	1	1	0	0	0	0	1	0	0	0	1	0	1	0	0
urban	3	5	34	male	11	150	45	20	0	1	1	1	1	0	1	1	0	1	0	1	0	1	1	0	1	0	0	0	0	1	1	1	0
urban	4	5	46	female	11	150	30	13.3333	0	0	1	0	1	0	1	0	0	1	1	1	0	1	1	1	1	0	0	1	1	0	0	0	0
urban	2	5	26	female	11	150	37	16.4444	0	0	0	0	1	0	0	0	0	1	1	0	0	0	1	0	1	0	0	1	1	0	0	0	0
urban	4	5	47	male	11	150	40	17.7778	0	0	0	0	0	0	0	0	0	1	0	1	0	0	0	0	0	0	0	1	0	1	0	0	0
urban	4	5	47	male	11	150	35	15.5556	0	1	0	0	0	0	0	0	0	0	0		0	0	0	0	0	0	0	1	1	0	0	0	0
rural	6	5	63	male	11	150	35	15.5556	0	1	1	0	0	1	1	0	0	0	1	0	0	0	0	0	0	0	0	1	1	1	1	0	0
rural	5	5	53	female	11	150	23	10.2222	0	1	1	0	0	0	0	0	1	0	0	0	1	1	1	0	1	0	0	1	1	0	1	0	0
urban	1	5	16	male	11	150	30	13.3333	0	0	0	0	0	0	0	0	0	1	1	1	0	0	0	0	0	0	0	1	0	1	1	0	0
rural	5	5	54	female	11	150	34	15.1111	0	1	0	0	1	0	0	0	0	1	0	1	1	0	0	0	0	0	0	1	1	0	1	0	0
urban	8	5	83	female	11	150	45	20	0	1	1	1	1	0	1	0	1	0	0	1	0	1	1	0	1	0	1	0	1	1	0	0	0
urban	1	5	14	male	10	150	43.1	19.1556	0	0	1	0	1	0	1	0	0	1	1	1	0	0	0	0	1	0	0	0	1	0	0	0	0
urban	2	5	24	male	10	150	35	15.5556	0	0	0	0	0	0	0	0	0	1	0	1		0	1	0	0	0	0	0	0	1	0	0	0
urban	7	5	71	male	10	150	47	20.8889	0	0	0	0	1	0	1	1	0	1	1	1	1	0	0	1	1	1	0	1	1	0	0	0	0
urban	8	5	84	female	11	150	40	17.7778	0	0	1	1	0	0	1	0	0	1	0	1	0	0	1	0	0	0	0	1	1	0	0	0	0
urban	1	5	14	female	10	150	31	13.7778	0	0	1	1	1	0	1	0	0	1	0	1	0	0	1	1	1	0	0	0	0	1	0	0	0
urban	7	5	71	female	10	150	45	20	0	1	0	0	0	0	1	0	0	1	0	1	1	1	0	0	1	0	0	1	0	1	0	0	0
urban	8	5	84	male	10	150	40	17.7778	0	0	1	1	1	0	1	0	0	1	1	1	0	0	1	0	1	0	1	0	1	0	0	1	0
urban	1	5	16	female	10	150	30	13.3333	0	1	1	0	1	0	1	0	0	1	0	0	0	1	1	0	0	0	1	1	1	0	0	1	0
urban	4	5	47	male	10	150	50	22.2222	0	1	0	0	0	0	1	0	0	0	0	0	0	1	1	1	1	1	0	1	0	1	1	0	0
urban	3	5	34	female	10	150	42	18.6667	0	1	0	0	0	0	1	0	0	1	0	1	0	0	0	0	0	1	0	1	1	0	1	0	0
urban	1	5	14	male	10	150	31	13.7778	0	1	1	0	0	0	1	0	1	1	1	1	0	0	0	0	1	0	0	0	0	1	0	0	0
urban	3	5	34	male	10	150	30	13.3333	0	1	1	1	1	0	1	0	0	1		1	0	0	0	1	0	0	0	0	1	0	0	0	0
rural	5	5	54	female	10	150	45	20	0	1	1	0	0	1	0	0	1	1	1		0	0	1	0	1	0	1	0	1	1	0	0	0
urban	8	5	83	male	10	150	39	17.3333	0	0	0	0	0	0	1	0	0	1	1	1	0	0	1	0	0	1	0	0	1	0	0	0	0
rural	5	5	54	male	10	150	25	11.1111	0	1	1	0	1	0	1	0	1	1	0	1	1	1	1	0	1	0	0	1	1	0	0	0	0
urban	2	4	23	female	10	150	34	15.1111	0	0	1	0	1	0	1	0	1	1		1	0	0	1	0	1	0	0	1	1	0	0	0	0
urban	4	5	47	female	10	150	36	16	0	1	1	0	1	0	1	0	0	1	0	1	0	1	0	0	0	0	0	1	0	1	1	0	0
urban	3	5	33	male	10	150	34	15.1111	0	0	1	0	0	0	1	0	0		0	0		0	0	0	0	0	0	1	0	1	0	0	0
urban	7	5	73	male	10	150	31	13.7778	0	0	1	0	0	1	1	0	1	1	0	1	1	1	0	0	1	0	0	0	0	1	0	0	0
urban	1	4	12	male	10	150	37	16.4444	0	0	1	0	1	0	0	0	1	1	1	0	0	0	1	0	1	0	0	0	0	1	0	1	0
urban	4	4	43	female	10	150	35	15.5556	0	1	0	0	0	0	1	0	1	1	1	1	0	0	0	0	0	0	0	1	1	1	0	0	0
urban	7	5	72	female	10	150	45	20	0	0	0	0	1	0	0	0	1	1	0	1	0	0	0	0	0	0	0	0	1	0	0	0	0
rural	6	5	63	female	10	150	37	16.4444	0	1	0	0	1	0	1	0	0		1		0	1	0	0	1	0	1	1	1	0	0	1	0
urban	3	4	31	male	10	150	35	15.5556	0	0	0	0	1	0	0	0	0	1	1	0	0	0	0	0	0	0	0	0	1	0	0	0	0
rural	5	4	51	male	10	150	37	16.4444	0	0	1	1	1	0	0	0	1	1	0	0	0	1	1	0	1	1	0	1	1	0	1	0	0
urban	4	4	43	female	10	150	30	13.3333	0	0	0	0	0	0	1	0	0	1	0	0	0	0	1	0	0	0	0	0	1	1	1	0	0
urban	1	4	12	female	10	150	40	17.7778	0	1	1	0	1	0	1	0	1	1	0	0	1	0	1	1	1	0	0	0	1	0	1	0	0
urban	2	4	21	female	10	150	36.5	16.2222	0	0	0	0	1	0	0	0	1	1	0	1	0	0	0	0	0	0	0	0	0	1	0	0	0
urban	1	4	12	male	10	150	45	20	0	0	0	0	0	0	0	0	0	1	1	0	0	0	0	0	0	0	0	0	1	0	0	1	0
urban	1	5	15	female	10	150	40	17.7778	0	0	1	1	1	0	0	0	1	1	1	1		0	0	0	1	0	1	0	1	1	1	0	0
urban	8	4	81	male	10	150	32	14.2222	0	0	0	0	0	0	0	0	0	1	1		0	0	0	0	0	1	0	0	1	1	0	0	0
urban	2	4	22	male	10	150	40	17.7778	0	1	0	0	0	0	1	0	0	1	0	0	0	0	1	0	0	0	0	0	0	1	0	1	0
rural	5	4	52	female	10	150	40	17.7778	0	1	0	0	0	0	1	0	1	1	0	1		0	0	0	1		0	1	1	0	1	0	0
urban	8	4	82	male	10	150	35	15.5556	0	0	1	0	1	0	0	0	0	1	0	1	0	0	0	0	0	0	0	0	0	1	1	0	0
urban	1	5	14	female	10	150	33	14.6667	0	0	0	1	1	0	0	0	0	1	0	0	0	0	0	0	0	0	0	1	1	0	0	0	0
urban	4	4	41	male	10	150	45	20	0	0	0	0	1	0	1	0	1	1		1	0	0	0	0	0	0	0	0	1	0	0	0	0
urban	4	4	43	female	10	150	31	13.7778	0	0	1	0	0	0	1	0	1	1	0	1	0	0	0	0	1	1	0	0	1	0	1	0	0
urban	1	5	14	male	10	150	47	20.8889	0	0	0	0	0	0	0	0	1	1	0	1	0	0	0	0	0	0	0	1	1	1	0	0	0
urban	8	4	82	female	10	150	21	9.33333	0	0	0	0	1	0	1	0	0	1	0	1	0	1	0	0	1	0	0	0	1	0	0	0	0
urban	4	4	42	male	10	150	43.5	19.3333	0	0	0	0	1		0	0	0	1	1	1	0	0	0	0	1	0	0	0	1	0	0	0	0
urban	4	4	44	male	10	150	43.5	19.3333	0	1	0	0	0	0	1	0	1	1	0	0	0	0	0	0	0	0	0	0	1	0	1	0	0
rural	5	4	51	female	10	150	31.5	14	0	0	0	0	0	0	0	0	0	1	1	1	0	0	0	0	0	0	0	1	1	0	1	1	0
urban	4	4	44	female	10	150	33	14.6667	0	0	0	0	1	0	1	0	0	1	1	1	0	0	0	0	1	0	0	0	1	0	0	0	0
urban	8	5	83	male	10	150	45	20	0	0	1	0	1	0	0	0	1	1	0	1	0	0	1	1	1	0	0	0	0	1	0	0	0
rural	5	4	51	male	9	150	40	17.7778	0	0	0	0	0	0	1	0	0	1	0	1		0	0	0	0	1	0	0	1	0	1	0	0
urban	8	4	81	male	10	150	43	19.1111	0	1	1	0	0	0	1	0	0	1	1	1	0	0	0	1	0	0	0	1	0	1	0	0	0
urban	8	4	82	female	9	150	33	14.6667	0	0	1	0	1	0	0	0	0	1	0	1	0	1	1	0	1	0	0	1	1	1	0	0	0
urban	8	5	84	male	9	150	42	18.6667	0	1	0	0	0	0	0	0	1	1	1	1	0	0	0	1	0	0	0	1	1	0	0	0	0
urban	3	4	32	female	9	150	31.5	14	0	0	0	0	1	0	0	0	0	1	0	1	0	0	0	0	0	1	0	1	1	0	0	0	0
urban	1	4	11	male	9	150	33	14.6667	0	0	0	0	0	0	1	0	0	1	1	0	0	0	1	0	1	0	0	0	1	0	0	0	0
urban	4	4	43	male	9	150	34	15.1111	0	1	1	1	1	0	1	0	1	0	0	0	0	0	1	0	1	0	0	1	1	1	1	1	0
urban	2	4	23	male	9	150	45	20	0	1	1	0	1	0	0	1	0	1	0	0	0	1	0	0	0	0	0	1	1	1	0	1	0
urban	4	5	46	male	11	150	42	18.6667	0	0	1	1	1	0	1	0	0	1	1	1	0	0	1	0	1	0	0	1	1	0	0	0	0
urban	8	4	82	male	10	150	32.5	14.4444	0	0	1	1	1	0	0	0	0	1	0	1	0	0	0	0	1	1	1	1	0	1	1	0	0
rural	6	4	61	male	10	150	40	17.7778	0	1	0	0	1	0	0	0	0	1	1	0	0	0	0	0	1	0	0	1	1	0	1	0	0
urban	1	4	11	male	10	150	49.5	22	0	0	0	1	1	0	0	0	1	1	1	1	0	0	1	0	1	1	0	1	0	1	0	0	0
urban	2	5	25	male	12	151	31	13.5959	0	0	0	0	1	0	0	0	1	1	0	1	0	0	0	0	1	0	0	1	1	0	0	0	0
urban	7	5	73	female	11	151	31.5	13.8152	0	0	1	0	0	0	0	0	0	1	0	0	0	0	0	0	0	0	0	0	1	1	0	1	0
urban	3	5	33	male	11	151	52	22.806	0	1	0	0	0	0	0	0	0	1	1	1	0	0	0	0		0	0	0	0	1	1	0	0
urban	1	5	14	female	11	151	37	16.2274	0	1	0	0	1	0	1	0	0	1	0	1	0	1	0	0	1	0	0	1	1	0	0	0	0
urban	1	5	16	male	11	151	51	22.3674	0	1	1	1	1	0	0	0	0	1	0	1		0	0	0	0	1	0	0	1	1	0	0	0
urban	7	5	73	female	11	151	36	15.7888	0	0	1	0	0	0	1	0	1	1		1	0	0	1	0	0	0	0	1	1	0	0	0	0
urban	4	5	47	male	11	151	39	17.1045	0	0	0	0	0	0	1	0	0	1	0	1	0	0	0	0	0	0	0	0	0	1	0	0	0
urban	4	5	47	male	11	151	41	17.9817	0	0	0	0	1	0	0	0	0	1	1	0	0	0	0	0	1	0	0	1	0	0	0	0	0
urban	2	5	24	female	11	151	43	18.8588	0	1	0	0	1	0	1	0	0	1	0	0		1	0	0	1	1	0	1	1	0	0	0	0
urban	4	5	45	male	11	151	34.6	15.1748	0	0	1	1	0	0	0	0	1	1	0	0	0	1	1	1	0	0	0	1	1	0	0	0	0
urban	1	5	14	female	11	151	35	15.3502	0	0	0	0	1	0	1	0	0	1	1	1	0	0	0	0	0	1	0	0	1	0	1	0	0
urban	4	5	48	male	11	151	30	13.1573	0	1	0	0	0	0	1	0	0	1	0	1	0	0	0	0	0	0	0	0	1	0	1	0	0
urban	2	5	25	female	11	151	40	17.5431	0	0	1	0	0	0	0	0	1	1	0	0	0	0	1	1	1	0	1	1	1	1	0	0	0
urban	8	5	84	male	11	151	43	18.8588	0	0	0	0	1	0	0	0	1	1	0	0	0	0	0	0	1	0	0	1	0	1	0	0	0
urban	2	5	25	male	11	151	42	18.4202	0	0	1	0	1	0	1	0	0	1	0	1	0	1	1	0	1	0	0	1	1	1	0	0	0
urban	1	5	14	female	11	151	35	15.3502	0	1	1	1	1	0	1	0	0	1	1	0	0	1	1	1	1	0	1	0	0	1	1	0	0
urban	8	5	83	male	11	151	38	16.6659	0	0	0	0	0	0	0	0	0	1	0	1	0	0	0	0	0	0	1	1	0	1	0	0	0
urban	4	5	46	male	11	151	41	17.9817	0	0	1	0	1	0	1	0	1	1	1	1	0	1	0	0	1	0	0	1	1	1	0	0	0
urban	4	5	46	male	10	151	35.5	15.5695	0	1	1	0	1	0	1	0	1	1	1	1	0	1	1	0	0	0	0	0	0	1	0	0	0
urban	7	5	72	female	10	151	46	20.1746	0	0	0	0	1	0	1	1	0	1	1	1	0	0	1	0	1	1	0	0	1	0	0	0	0
urban	7	5	71	male	10	151	45	19.736	0	0	0	1	1	0	0	0	0	1		0	0	0	0	0	0	0	0	1	1	1	0	0	0
urban	4	5	47	female	10	151	35	15.3502	0	0	0	1	1	0	1	0	0	1	0	1	0	0	0	0	1	0	0	1	1	1	0	0	0
urban	2	5	25	male	10	151	37	16.2274	0	0	1	1	1	0	1	0	0		1	1	0	1	0	0	1	0	0	1	1	0	0	0	0
urban	4	4	42	female	10	151	50	21.9289	0	0	0	0		0	0	0	0	1	0	1	0	0	0	0	0	0	0	1	1	0	0	0	0
urban	2	4	21	male	10	151	49	21.4903	0	1	1	1	1	1	1	0	0	1	0	0	0	1	1	0	0	1	0	0	1	1	1	0	0
urban	2	5	26	female	10	151	38	16.6659	0	1	1	0	0	0	0	0	1	1	0	0	0	1	1	0	1	0	1	0	1	0	0	0	0
urban	1	4	13	female	10	151	26.5	11.6223	0	1	1	1	1	0	1	0	1	1	0	0		0	0	0	1	0	0	1	1	1	0	0	0
urban	8	4	82	male	10	151	31	13.5959	0	1	1	1	1	0	1	0	0	1	0	1	0	0	0	0	1	0	0	0	0	1	1	0	0
urban	2	4	21	male	10	151	41	17.9817	0	1	1		0	0	1	1	0	1	1	1	0	0	0	0	0	0	0	1	1	1	0	1	0
urban	4	4	43	male	9	151	48	21.0517	0	1	1	0	0	0	0	0	1	1	0	1	0	1	0	0		1	1	1	1	1	0	0	0
urban	4	4	41	male	9	151	42	18.4202	0	1	0	0	1	0	1	0	0	1	0	0	0	1	1	0	1	0	1	0	0	1	0	0	0
urban	2	5	26	male	12	152	45	19.4771	0	0	1	1	1	0	0	0	0	1	0	1	0	0	0	1	0	0	0	1	1	0	0	1	0
rural	5	5	53	male	11	152	52	22.5069	0	0	1	0	1	0	1	0	1	1	1	0	1	1	1	0	1	0	0	1	1	0	1	0	0
urban	8	5	84	female	11	152	32	13.8504	0	0	1	0	1	0	1	0	1	1	0	1	0	0	1	1	1	0	0	0	1	0	0	0	0
urban	8	5	84	female	11	152	39	16.8802	0	1	1	1	1	0	1	0	0	1	1	1	0	1	1	0	1	0	0	0	1	1	0	0	0
rural	5	5	53	female	11	152	39	16.8802	0	1	1	0	1	0	1	0	0	1	0	1	1	1	1	0	1	0	0	1	1	0	1	0	0
urban	4	5	47	female	11	152	49	21.2084	0	0	1	0	0	0	0	0	1	1	1	1	0	1	1	0	0	0	1	1	1	0	0	0	0
rural	6	5	63	female	11	152	52	22.5069	0	1	1	0	1	1	1	1	0	1	0	0	0	0	1	1	1	1	0	0	1	0	1	0	0
urban	2	5	24	male	11	152	36	15.5817	0	1	1	0	1	0	0	0	0	1	0	0	0	0	1	0	1	0	0	0	0	1	1	0	0
urban	4	5	48	male	11	152	50	21.6413	0	0	1	0	1	0	0	0	0	1	1	0		0	0	1	1	0	0	1	1	0	0	0	0
urban	4	5	47	female	11	152	38	16.4474	0	0	1	1	1	1	1	0	0	1	1	1	0	1	1	1	1	0	0	1	0	1	0	0	0
urban	2	5	26	male	11	152	39	16.8802	0	0	0	0	1	0	0	0	0	1	0	0	0	0	0	0	0	0	0	1	0	1	0	0	0
urban	2	5	26	female	11	152	43	18.6115	0	1	1	1	0	0	1	0	0	1	0	1	0	1	0	0	1	0	0	0	1	0	0	0	0
urban	4	5	47	female	11	152	42	18.1787	0	1	1	0	1	0	1	0	0	1	1	1	0	1	0	0	1	1	0	1	0	1	0	0	0
urban	1	5	15	male	11	152	36	15.5817	0	0	1	1	1	0	0	0	0	1	0	1	0	0	0	1	1	0	1	1	1	0	0	0	0
urban	4	5	47	male	11	152	49	21.2084	0	0	1	1	1	0	1	0	0	1	0	1	0	0	1	0	1	0	0	1	0	1	0	0	0
urban	7	5	72	male	11	152	37	16.0145	0	1	1	1	1	0	1	0	0	1	1	1	0	1	0	0	0	0	0	0	0	1	0	0	0
urban	8	5	83	female	11	152	38	16.4474	0	0	0	0	1	0	1	0	0	1	0	1	0	1	0	0	1	0	0	0	1	0	0	0	0
urban	8	5	84	female	11	152	41	17.7458	0	1	1	0	1	0	1	0	0	1	0	1	0	0	1	1	0	0	0	0	1	0	1	0	0
urban	1	5	16	female	11	152	35	15.1489	0	0	1	0	1	0	0	0	1	1	0	1		0	1	0	1	0	0	0	1	0	0	0	0
urban	7	5	74	female	11	152	42	18.1787	0	0	1	0	0	0	0	0	1	1	0	1	0	1	1	0	0	0	0	0	1	0	0	0	0
urban	4	5	47	male	11	152	48	20.7756	0	0	0	1	0	0	1	0	0	1	1	0	0	0	0	0	0	0	0	1	1	0	0	0	0
urban	1	5	16	male	11	152	41	17.7458	0	1	1	0	1	0	1	0	0	1	0	1	0	1	1	1	1	0	0	0	0	1	1	0	0
urban	4	5	47	female	11	152	41	17.7458	0	0	1	0	0	0	0	0	1	1	0	1	0	1	1	0	1	0	0	0	1	0	0	0	0
urban	2	5	26	female	11	152	33	14.2832	0	1	0	0	0	0	0	0	0	1	0	1	0	1	0	0	0	0	0	1	1	0	0	0	0
urban	1	5	16	female	10	152	30	12.9848	0	1	0	0	1	0	1	0	0	1	0	1	0	1	0	0	1	0	0	1	1	0	0	0	0
urban	8	5	84	male	11	152	35	15.1489	0	0	1	0	1	0	1	0	0	1	0	0	0	0	1	0	1	0	0	0	0	1	0	0	0
urban	7	5	74	male	10	152	35	15.1489	0	0	0	1	1	0	0	0	0	1	1	1	1	0	0	0	0	0	0	1	0	1	0	0	0
urban	1	5	15	female	10	152	37.5	16.231	0	0	0	0	0	0	0	0	0	1	0	1	0	1	0	0	0	0	0	0	1	0	0	0	0
urban	1	5	16	male	10	152	32.5	14.0668	0	0	0	0	0	0	0	0	0	1	0	0		0	0	0	0	0	0	0	0	1	0	1	0
urban	1	5	15	female	10	152	35	15.1489	0	0	0	0	0	0	1	0	1	1	0	0	0	0	0	0	0	0	0	1	0	0	0	0	0
urban	2	5	24	female	10	152	36	15.5817	0	0	0	0	1	0	1	0	0	1	0	1	0	0	0	0	1	1	0	0	1	1	0	0	0
urban	8	5	84	female	10	152	30	12.9848	0	1	0	1	1	0	1	0	0	1	0	0	0	0	0	0	0	0	0	0	0	1	0	0	0
rural	5	5	54	male	10	152	42	18.1787	0	0	0	0	0	0	0	0	0	1	1	1	0	0	0	0	0	0	0	0	1	0	1	0	0
urban	3	4	32	male	10	152	43	18.6115	0	1	1	0	0	0	0	0	0	1	1	1	0	1	1	0	1	0	0	1	1	0	0	0	0
urban	4	5	46	male	10	152	39	16.8802	0	1	0	0	1	0	1	0	0	1	0	0	0	0	0	0	1	0	1	1	1	0	0	0	0
urban	8	4	82	female	10	152	43	18.6115	0	0	1	1	1	0	1	0	0	1	0	0	0	0	1	1	0	1	1	0	1	1	0	0	0
urban	3	4	31	female	10	152	30	12.9848	0	1	1	0	1	0	0	0	0	1	0	0	0	1	1	0	1	0	1	0	1	0	0	0	0
urban	2	4	22	male	10	152	49	21.2084	0	1	0	0	1	0	1	0	1	1	0	0	0	1	0	1	1	0	0	0	1	0	1	0	0
urban	4	4	42	male	10	152	50	21.6413	0	1	1	0	1	0	1	0	0	1	0	0	0	0		0	0	0	1	1	0	1	0	0	0
urban	4	4	44	female	10	152	33	14.2832	0	0	0	0	1	0	1	0	0	1	0	0	1	0	0	1	1	0	0	1	0	1	0	0	0
urban	2	4	21	female	10	152	31	13.4176	0	0	1	0	0	0	1	0	0	1	0	0	0	0	0	0	0	1	0	1	0	1	0	0	0
urban	4	4	44	male	9	152	38.4	16.6205	0	1	1	0	1	0	1	0	0	1	0	0	0	0	0	0	1	0	0	0	1	1	0	0	0
urban	3	4	32	female	10	152.2	35	15.1091	0	0	0	0	1	0	1	0	0	1	1	1	0	1	0	0	1	0	0	0	1	0	0	0	0
urban	4	5	48	female	11	152.5	45	19.3496	0	0	0	0	0	0	1	0	0	1	0	1	0	0	0	0	0	0	0	0	1	0	1	0	0
urban	2	5	25	male	12	153	44	18.7962	0	0	1	0	1	0	1	0	1	1	0	1	0	0	1	0	0	0	0	1	1	1	0	0	0
urban	1	5	14	female	11	153	37	15.8059	0	0	0	0	0	0	0	0	0	1	0	0	0	0	0	0	0	1	0	1	1	0	0	0	0
urban	2	5	25	female	11	153	42	17.9418	0	0	1	0	1	0	1	0	0	1	0	1	0	0	0	0	1	0	0	1	1	0	0	0	0
urban	1	5	14	male	11	153	55	23.4952	0	1	1	0	1	0	0	0	0	1	1	1		0	0	0	1	1	0	1	1	0	0	0	0
urban	7	5	74	male	11	153	41	17.5146	0	0	0	0	0	0	0	0	0	1	0	1	0	0	0	0	0	0	0	1	1	1	0	0	0
rural	6	5	63	female	11	153	37	15.8059	0	1	1	0	1	0	1	0	0	1	0	1	1	0	1	0	1	1	0	1	1	0	0	0	0
urban	4	5	47	female	11	153	40	17.0874	0	0	1	0	1	0	1	0	1	1	0	1	0	0	1	0	1	1	0	0	1	1	0	0	0
urban	2	5	24	female	11	153	40	17.0874	0	1	0	0	1	0	1	0	1	1	0	1	1	1	0	0	1	0	0	1	0	1	1	0	0
urban	1	5	16	female	11	153	36	15.3787	0	1	0	0	1	0	1	0	0	1	0	0	0	0	1	0	0	0	0	0	0	1	1	0	0
urban	7	5	71	male	11	153	46	19.6506	0	1	0	0	1	0	1	0	0	1	1	1	0	0	0	0	0	0	0	1	1	1	0	0	0
urban	7	5	73	male	11	153	51	21.7865	0	1	1	0	0	0	0	0	0	1	0	0	0	0	1	1	1	0	0	0	0	1	0	0	0
urban	2	5	26	female	11	153	42.5	18.1554	0	0	1	0	1	0	1	0	1	1	0	1	0	0	0	0	1	0	0	1	0	1	1	0	0
urban	4	5	47	female	11	153	32	13.67	0	0	1	0	1	0	1	0	0	1	0	1	0	0	1	0	1	0	0	1	1	1	0	1	0
urban	7	5	74	female	11	153	37	15.8059	0	0	1	0	0	0	0	0	0	1	0	1	0	1	1	0	1	0	0	1	1	1	1	0	0
urban	4	5	45	female	11	153	50	21.3593	0	0	1	1	1	0	0	0	0	1	0	1		0	1	1	1	0	0	1	1	0	0	0	0
rural	6	5	63	male	11	153	55	23.4952	0	1	1	0	0	0	1	0	1	1	0	1	1	1	1	1	1	0	1	1	1	1	1	0	0
urban	3	5	34	female	11	153	40	17.0874	0	1	0	0	1	0	0	0	0	1	1	1	0	1	0	1	0	0	0	0	0	1	0	0	0
rural	6	5	63	female	11	153	37	15.8059	0	0	0	0	1	0	0	0	0	1	0	1	0	0	0	0	0	0	0	1	1	0	1	0	0
urban	7	5	71	female	11	153	33.5	14.3107	0	1	1	1	1	0	0	0	1	1	0	1	0	0	0	0	1	0	0	0	1	0	0	0	0
rural	5	5	53	female	11	153	36	15.3787	0	0	1	0	1	0	0	0	1	1	0	0	0	0	1	0	1	0	0	1	1	0	1	0	0
rural	5	5	54	female	11	153	40	17.0874	0	0	0	0	1	0	1	0	0	1	0		0	1	0	0	1	0	0	1	1	0	0	0	0
urban	8	5	84	female	11	153	31.3	13.3709	0	1	1	0	1	0	1	0	0	1	0	0	0	1	0	0	1	0	0	0	1	1	0	0	0
urban	1	4	11	male	11	153	44.2	18.8816	0	1	0	0	1	0	1	0	0	1	0	1	0	1	0	0	0	0	0	1	0	1	0	0	0
urban	2	5	26	male	11	153	36	15.3787	0	1	1	0	1	0	0	0	1	1	0	0	0	1	0	0	0	0	1	1	1	0	0	0	0
urban	4	5	47	female	11	153	41	17.5146	0	0	1	0	1	0	1	0	0	1		1	0	1	1	0	1	1	0	0	1	0	0	0	0
rural	6	5	63	female	11	153	37	15.8059	0	1	1	0	1	0	1	0	0	1	1	1	0	1	1	0	1	0	0	1	0	1	0	0	0
urban	1	5	14	female	11	153	26	11.1068	0	0	1	1	1	0	0	0	0	1	1	1	0	0	0	0	1	0	0	0	1	1	0	0	0
rural	6	5	63	female	11	153	35	14.9515	0	1	1	0	1	0	1	0	0	1	0	1	0	1	1	0	1	0	0	1	1	0	0	1	0
urban	1	5	15	female	11	153	45.5	19.437	0	1	1	0	1	0	0	0	0	1	0	0	0	1	1	0	1	0	0	1	1	0	0	0	0
rural	5	5	54	female	11	153	47	20.0777	0	1	1	0	0	0	0	0	0	1	0	0	0	0	1	0	1	0	0	1	1	0	0	0	0
urban	1	5	14	female	10	153	39.5	16.8739	0	0	0	0	1	0	0	0	0	1	0	1	0	1	0	0	1	0	1	0	1	1	0	0	0
urban	1	5	16	female	10	153	35.5	15.1651	0	1	0	0	1	0	0	0	0	1	0	1	0	1	0	0	1	1	1	1	1	1	1	0	0
urban	4	5	47	male	10	153	41	17.5146	0	0	0	0	1	0		0	0	1	1		0	0	0	0	0	0	0	1	1	1	0	0	0
urban	7	5	71	female	10	153	48	20.5049	0	1	1	0	1	0	1	0	1	1	0	0	0	0	1	0	1	0	0	1	1	0	1	0	0
urban	4	5	48	female	10	153	36	15.3787	0	1	1	0	1	0	1	0	0	1	1	1	0	1	0	0	1	0	0	0	1	0	0	0	0
urban	2	5	25	male	10	153	42	17.9418	0	0	1	0	1	0	1	0	0	1	0	1	0	0	0	0	0	0	0	0	0	1	0	0	0
urban	1	5	14	female	10	153	35	14.9515	0	0	1	0	0	0	0	0	0	1	0	0	0	0	1	0	0	0	1	1	1	0	0	0	0
urban	4	4	44	male	10	153	50	21.3593	0	1	0	1	0	1	1	1	0	1	0	1	0	0	0	0	0	0	0	1	0	1	1	0	0
urban	7	5	71	male	10	153	48	20.5049	0	0	0	1	1	0	0	0	0	1	1	1		0	0	0	1	0	0	1	1	0	0	0	0
urban	4	4	44	female	10	153	39	16.6603	0	1	1	0	1	0	1	0	0	1	0	1	0	1	1	0	1	0	0	1	1	0	0	0	0
urban	2	4	22	female	10	153	34	14.5243	0	0	1	0	0	0	0	0	1	1	0	0	0	0	0	0	0	0	0	0			0	0	0
urban	4	4	41	female	10	153	31	13.2428	0	1	1	0	1	0	0	0	1	0	0	1	0	1	0	0	1	0	0	1	1	0	1	0	0
urban	4	5	47	male	10	153	40	17.0874	0	0	0	0	0	0	0	0	0	1	0		0	0	0	0	0	0	0	0	1	0	0	0	0
urban	8	4	82	male	10	153	43.8	18.7108	0	0	0	0	0	0	0	0	0	1	1	1	0	1	1	0	1	0	0	1	0	1	0	0	0
urban	1	4	12	male	10	153	42	17.9418	0	1	0	1	0	0	1	0	0	1	0	0	0	0	0	1	0	0	0	1	1	0	0	0	0
urban	2	4	21	female	9	153	44	18.7962	0	1	1	0	1	0	1	1	0	1	0	1	0	0	1	0	1	1	0	1	1	0	0	1	0
urban	2	5	24	male	10	153	30	12.8156	0	0	0	0	0	0	0	0	0	1	0	1	0	0	0	0	0	0	0	0	1	0	0	0	0
urban	3	5	34	male	11	154	52	21.9261	0	1	1	0	1	0	1	1	0	1	1	1	0	0	0	0	0	1	0	1	0	1	0	0	0
urban	7	5	73	female	11	154	36	15.1796	0	0	0	0	1	0	0	0	0	1	0	1	0	0	0	0	0	0	0	1	1	0	0	0	0
urban	7	5	72	female	11	154	44	18.5529	0	0	0	0	1	0	1	0	1	1	0	1	0	0	0	0	1	0	0	1	1	0	0	0	0
urban	8	5	83	male	11	154	33	13.9147	0	0	0	0	1	0	1	0	0	1	0	1	0	0	0	1	1	0	0	1	0	1	0	0	0
urban	3	5	33	female	11	154	38	16.0229	0	1	0	0	1	0	1	0	0	1	0	0	0	0	1	0	1	0	0	0	0	1	0	0	0
urban	4	5	48	male	11	154	45	18.9745	0	0	1	0	1	0	1	0	0	1	0	0	0	0	1	0	1	0	0	0	1	1	0	0	0
urban	7	5	72	male	11	154	33	13.9147	0	1	0	0	0	0	1	0	0	1		0	0	1	0	0	0	0	0	1	0	1	1	0	0
urban	4	5	46	female	11	154	45	18.9745	0	0	0	0	1	0	0	0	1	1	0	1	0	1	0	0	1	1	0	0	0	0	1	0	0
urban	1	5	15	female	11	154	45.5	19.1854	0	1	1	0	1	0	0	0	0	1	0	0	0	0	0	0	0	0	1	0	0	1	0	0	0
urban	3	5	34	female	11	154	42	17.7096	0	0	1	0	1	0	1	0	1	1	0	0	0	0	1	0	1	0	0	0	1	1	1	0	0
rural	5	5	54	female	11	154	40	16.8663	0	0	0	0	1	0	1	0	0	1	1	1	0	0	0	0	0	0	0	1	1	0	0	0	0
urban	1	5	16	female	11	154	32	13.493	0	0	0	0	1	0	1	0	0	1	0	1	0	0	0	0	0	0	0	0	1	1	0	0	0
urban	7	5	73	female	11	154	31.5	13.2822	0	0	0	0	0	0	0	0	0	1	1	1	0	0	0	0	0	0	0	0	1	0	0	0	0
urban	7	5	73	female	11	154	40	16.8663	0	0	1	0	1	0	0	0	0	1	0	1	0	0	1	0	1	0	0	1	1	0	0	0	0
urban	2	5	26	male	11	154	43	18.1312	0	0	0	0	1	0	0	0	0	1	0	0	0	1	0	0	1	0	0	0	1	0	0	0	0
urban	2	5	24	female	11	154	35	14.758	0	1	0	1	1	0	1	0	0	1	0	0	0	1	0	1	1	0	1	0	0	1	0	0	0
urban	8	5	83	male	11	154	55	23.1911	0	0	0	0	0	0	0	0	1	1	1	0	0	0	1	0	0	0	0	1	0	1	0	0	0
urban	1	5	16	female	11	154	34	14.3363	0	0	0	0	1	0	1	1	0	1	0	0	0	0	0	0	1	0	0	1	1	0	0	0	0
urban	4	5	45	female	11	154	41.6	17.5409	0	0	1	1	0	0	1	0	1	1	0	1	0	1	0	1	1	0	0	1	1	0	0	0	0
urban	8	5	84	female	11	154	35	14.758	0	0	1	0	1	0	1	0	1	1	0	1	0	0	0	1	1	1	1	1	0	1	0	0	0
rural	5	5	54	female	10	154	39	16.4446	0	1	1	0	1	0	1	0	1	1	0	1	1	1	0	0	1	0	0	1	0	1	0	0	0
urban	7	5	71	male	10	154	45	18.9745	0	0	0	1	1	0	1	0	0	1	1	1	0	1	1	0	1	0	0	0	1	1	0	0	0
rural	5	5	53	male	10	154	36	15.1796	0	1	0	0	0	0	1	0	0	1	0		0	0	0	0	0	0	0	1	1	0	0	0	0
urban	4	4	41	male	10	154	52	21.9261	0	1	1	1	1	0	1	0	0	1	0	1	0	0	1	1	1	0	0	0	0	1	0	0	0
urban	1	5	14	male	10	154	53	22.3478	0	1	1	1	1	0	1	0	0	1	0	0	0	1	1	1	1	1	0	1	1	0	0	0	0
urban	2	4	22	female	10	154	38	16.0229	0	1	0	0	1	1	1	0	1	1	1	1	0	0	1	1	1	0	0	0	0	1	0	0	0
urban	4	4	44	female	10	154	30	12.6497	0	0	0	1	0	0	0	0	0	1	0	1	0	0	0	0	0	0	0	0	1	0	1	0	0
urban	3	4	32	male	10	154	40	16.8663	0	0	1	0	1	0	1	1	0	0	0	1	0	0	0	0	1	0	0	1	1	0	1	0	0
urban	4	4	44	male	10	154	48	20.2395	0	0	0	0	0	0	0	0	0	1	0	1	0	0	0	0	0	1	1	1	1	1	0	0	0
urban	8	4	81	female	10	154	48	20.2395	0	1	1	0	0	0	1	0	0	1	0	1	0	0	0	0	1	0	0	0	0	0	0	0	0
urban	4	4	43	female	9	154	41	17.2879	0	0	1	0	0	0	1	0	1	1	0	0	0	0	0	0	0	1	0	0				0	0
urban	2	4	23	male	9	154	36.5	15.3905	0	0	0	0	1	0	0	0	1	1	1	1	0	0	0	0	1	0	0	0	1	0	0	0	0
urban	4	4	44	male	9	154	45.4	19.1432	0	1	1	0	0	0	0	0	0	1	0	0	0	1	1	0	0	1	0	1	1	0	0	0	0
urban	1	5	14	female	12	155	32	13.3195	0	0	0	0	1	0	0	0	0	1	1	1	0	0	0	0	0	0	1	1	1	0	1	0	0
rural	5	5	54	female	12	155	53	22.0604	0	0	1	1	1	0	0	0	1	1	0	0	1	1	1	1	0	1	0	1	1	0	1	0	0
rural	5	5	53	male	12	155	42	17.4818	0	1	1	1	1	0	1	0	1	1	0	0	1	0	0	0	0	0	0	1	1	0	1	0	0
urban	2	5	26	male	11	155	50	20.8117	0	1	1	0	1	0	1	0	0	1	0	0	0	0	0	0	0	0	0	1	1	0	1	0	0
urban	3	5	33	female	11	155	43	17.898	0	1	1	0	1	0	0	0	0	1	1	1	0	1	1	0	1	0	0	0	1	0	0	0	0
urban	4	5	48	female	11	155	39.2	16.3163	0	0	1	1	1	0	1	0	1	1	0	0	0	0	1	1	1	0	0	1	1	0	0	0	0
urban	1	5	15	male	11	155	53	22.0604	0	1	1	0	1	0	1	0	0	1	1	1	0	0	0	0	1	1	0	1	1	1	0	0	0
rural	5	5	53	male	11	155	35	14.5682	0	1	1	1	1	1	0	0	1	1	0	0	1	0	1	1	1	0	1	1	1	1	0	0	0
urban	7	5	71	male	11	155	40	16.6493	0	0	0	0	1	0	1	0	0	1	0	0	0	0	0	1	1	0	0	0	1	0	0	0	0
urban	4	5	46	female	11	155	32	13.3195	0	0	0	0	1	0	1	0	0	1	0	1	0	0	1	0	0	0	0	0	1	0	0	0	0
urban	3	5	33	male	11	155	40	16.6493	0	0	1	1	1	0	1	0	0	1	1	1	0	0	0	1	0	0	0	0	0	1	1	0	0
urban	4	5	48	male	11	155	45	18.7305	0		1	0	1	0	1	0	0	1	1	1	0	1	1	0	1	0	0	0	1	0	0	1	0
urban	7	5	74	male	11	155	48	19.9792	0	1	1	1	1	0	1	0	1	1	0	0	0	1	0	1	0	0	0	1	1	0	1	0	0
urban	7	5	72	female	11	155	38	15.8169	0	1	1	1	1	0	1	0	1		0	0	0	1	1	1	1	0	0	0	1	0	0	0	0
urban	1	5	14	female	11	155	36	14.9844	0	1	0	1	1	0	1	0	1	1	0	1	0	0	1	1	1	0	0	0	0	1	1	0	0
rural	6	5	63	female	11	155	32	13.3195	0	1	1	0	1	0	0	0	0	1	1	0	1	1	0	0	1	0	0	0	0	1	0	0	0
rural	5	5	54	female	11	155	32.5	13.5276	0	0	0	0	0	0	0	0	1	1	0	0	1	0	0	0	0	0	0	1	1	0	1	0	0
rural	6	5	63	male	11	155	36	14.9844	0	1	1	0	1	0	1	0	0	1	0	0	0	0	1	0	1	0	0	1	1	0	0	1	0
rural	5	5	54	female	11	155	49	20.3954	0	0	0	0	0	0	0	0	1	1	0	0	0	0	0	0	0	0	0	1	1	0	0	0	0
urban	2	5	25	male	11	155	36	14.9844	0	0	1	0	1	0	1	0	0	1	0	1	0	0	1	1	1	0	0	0	1	0	0	0	0
urban	2	5	24	male	11	155	38	15.8169	0	0	1	0	1	0	1	0	0	1	0	1	0	1	1	0	1	0	0	0	0	1	0	0	0
urban	7	5	73	female	11	155	48	19.9792	0	1	1	0	0	0	1	0	0	1	1	1	0	0	0	0	0	0	0	0	0	1	0	1	0
urban	7	5	73	male	11	155	45	18.7305	0	1	1	1	1	0	1	0	0	1	0	0	1	1	0	0	1	1	0	0	1	0	0	0	0
urban	2	5	26	male	11	155	54	22.4766	0	0	0	0	1	0	0	0	0	0	0	0	0	0	0	1	1	1	0	1	1	0	0	0	0
urban	7	5	73	male	11	155	43	17.898	0	0	1	1	1	0	1	0	0	1	0	1	0	0	1	1	1	0	0	1	0	1	0	0	0
urban	7	5	73	male	10	155	41	17.0656	0	1	1	0	1	0	0	1	0	1	0	0	1	1	0	0	0	0	0	1	1	0	0	0	0
urban	8	5	83	male	10	155	43	17.898	0	0	1	1	1	0	1	0	1	1	1	1	0	0	1	0	1	0	0	1	1	0	0	0	0
urban	2	5	26	male	10	155	35	14.5682	0	1	0	0	0	0	1	0	0	1	0	0	0	0	0	0	0	1	0	0	1	0	1	0	0
urban	2	5	24	male	10	155	36	14.9844	0	1	1	0	1	0	1	0	0	1	1	1		1	0	0	1	0	0	1	0	1	0	0	0
urban	2	5	24	male	10	155	51	21.2279	0	0	0	0	1	0	0	0	0	1	0	1	0	1	1	0	1	0	1	0	0	1	0	0	0
urban	4	5	48	male	10	155	30	12.487	0	0	1	0	0	0	1	0	0	1	0	1	0	0	1	0	0	0	1	1	1	0		0	0
rural	5	4	51	male	10	155	30	12.487	0	1	0	0	0	0	1	0	1	1	0	1	1	0	0	0	1	0	0	1	1	0	0	0	0
urban	1	4	11	male	10	155	38	15.8169	0	1	1	0	1	0	1	0	1	1	0	0	0	1	1	0	1	0	1	1	1	1	0	1	0
rural	5	4	51	male	10	155	40	16.6493	0	1	0	0	1	0	0	0	0	1	0	0	0	0	0	0	1	0	0	0	1	0	0	1	0
urban	2	4	21	male	10	155	41	17.0656	0	0	1	0	1	0	0	0	0	1	1	1	0	1	1	0	1	0	0	1	0	1	0	0	0
urban	2	4	23	female	10	155	42	17.4818	0	1	1	0	1	0	1	0	0	1	1	0	0	0	1	0	1	0	1	1	1	1	0	0	0
urban	7	5	73	female	11	155.5	53	21.9187	0	0	1	1	1	0	0	0	0	1	0	0	0	0	1	0	1	0	0	0	1	0	0	0	0
urban	1	5	16	male	11	156	30	12.3274	0	0	0	0	0	0	0	0	1	1	0	0	0	0	1	1	1	1	0	1	0	1	0	0	0
urban	2	5	24	male	11	156	50	20.5457	0	1	0	0	0	0	0	0	0	1	0	0	1	0	0	0	0	0	0	0	0	1	0	0	0
urban	3	5	34	female	11	156	40	16.4366	0	0	0	0	1	0	1	0	0	1	0	0	0	0	0	0	1	0	1	1	1	0	0	0	0
urban	7	5	74	male	11	156	49	20.1348	0	0	0	0	0	0	1	0	0	1	0	1	0	1	0	0	0	0	0	1	0	1	0	0	0
rural	5	5	54	male	11	156	38.6	15.8613	0	0	1	0	1	0	0	0	0	1	0	1	0	0	1	0	1	0	0	1	1	0	0	1	0
urban	7	5	71	male	11	156	46	18.902	0	0	0	0	0	0	1	0	0	1	1	1	1	0	0	0	0	0	1	1	1	0	0	0	0
urban	2	5	24	male	11	156	55	22.6003	0	0	1	0	0	0	0	0	0	1	1	1	0	0	0	0	0	0	0	0	0	1	0	0	0
urban	8	5	84	male	11	156	47.6	19.5595	0	0	0	0	1	1	1	0	0	1	1	1		0	0	0	1	0	0	0	1	0	0	0	0
urban	4	5	48	female	11	156	49	20.1348	0	1	1	0	1	0	0	0	1	1	0	0	0	1	0	1	0	0	0	1	1	0	1	0	0
urban	8	5	83	female	11	156	36.5	14.9984	0	0	1	0	0	0	0	0	1	1	1	1	0	0	0	0	0	0	1	0	1	1	0	0	0
urban	7	5	73	male	11	156	49.5	20.3402	0	1	1	0	1	0	1	0	0	1	1	1	0	1	0	0	1	0	0	0	0	1	0	1	0
urban	7	5	73	female	11	156	46	18.902	0	1	0	1	1	0	0	0	1	1	0	1	0	0	0	0	0	0	0	0	1	1	0	0	0
urban	7	5	72	male	11	156	56	23.0112	0	0	0	0	0	0	0	0	0	1	0	0	1	0	0	0	0	0	0	0	0	1	0	0	0
urban	7	5	72	female	11	156	30	12.3274	0	0	0	0	0	0	0	0	1	1	1	1	0	0	0	0	0	0	0	0	1	0	0	0	0
rural	5	5	53	female	10	156	42	17.2584	0	1	0	0	1	0	1	0	0	1	0	0	1	1	0	0	0	0	0	1	0	1	1	0	0
urban	3	5	33	female	10	156	38	15.6147	0	0	0	0	1	0	1	0	0	1	0	0	0	1	1	0	0		0	1	0	1	0	0	0
urban	8	5	83	male	10	156	49.6	20.3813	0	0	1	0	0	1	1	0	0	1	0	0	0	0	0	0	0	0	0	1	0	1	1	1	0
urban	4	5	47	female	10	156	33	13.5602	0	0	1	0	1	0	1	0	0	1	0	1	0	0	0	0	0	0	0	0	1	0	1	0	0
urban	1	4	11	male	10	156	27	11.0947	0	0	1	1	1	0	0	1	0	1	0	0	0	0	1	0	0	0	0	1	1	0	0	0	0
urban	2	4	22	male	10	156	35	14.382	0	1	0	0	0	0	1	0	0	1	0	0	0	0	0	0	0	0	0	0			0	0	0
urban	8	4	81	male	10	156	38.4	15.7791	0	0	1	0	1	0	1	0	0	1	0	1	0	0	0	0	0	0	0	0	1	1	0	0	0
urban	2	4	21	female	10	156	38	15.6147	0	0	0	0	1	0	1	0	1	1	1	1	0	1	1	0	1	1	0	1	1	0	0	0	0
urban	8	4	82	female	10	156	35	14.382	0	0	0	0	1	0	0	0	0	1	0	1	0	0	0	0	0	0	0	0	1	0	0	0	0
urban	1	4	11	female	10	156	36	14.7929	0	1	0	0	1	0	1	1	0	1	1	1	0	0	0	0	0	0	0	1	1	0	0	0	0
urban	1	4	12	male	9	156	50	20.5457	0	1	0	1	1	0	1	0	0	1	0	0	0	0	0	0	0	0	0	0			0	0	0
urban	2	4	23	female	9	156	36	14.7929	0	0	1	0	1	0	1	0	0	1	1	1	0	0	1	0	1	0	0	1	1	0	0	0	0
rural	5	5	54	female	11	157	37	15.0108	0	0	1	0	1	0	1	0	0	1	1	1	0	0	1	0	1	0	0	1	1	0	0	0	0
urban	3	5	34	female	11	157	41	16.6335	0	0	1	0	0	0	0	0	0	1	0	0	0	0	0	0	0	0	0	0	0	1	0	0	0
urban	7	5	71	female	11	157	47	19.0677	0	0	1	0	1	0	1	0	0	1	0	0	0	1	1	1	1	0	0	1	1	1	1	0	0
urban	1	5	15	female	11	157	36	14.6051	0	0	0	0	1	0	0	0	0	1	1	1	0	0	0	0	1	0	0	1	1	1	0	0	0
urban	7	5	72	male	11	157	57	23.1247	0	1	0	1	0	0	0	0	0	1	0	0	0	1	0	1	0	0	0	1	1	0	0	0	0
urban	7	5	73	male	11	157	56.3	22.8407	0	0	1	0	1	0	1	0	0	1	1	1	0	0	1	0	1	0	0	0	0	1	0	0	0
urban	8	5	83	male	11	157	45	18.2563	0	1	1	0	1	0	1	0	0	1	0	1	0	1	1	0	1	0	0	1	0	1	0	0	0
urban	2	5	26	female	11	157	46	18.662	0	1	0	0	1	0	1	0	1	1	1	1	0	1	1	0	1	0	1	0	1	1	0	0	0
urban	7	5	74	female	11	157	41	16.6335	0	0	1	0	1	0	1	0	0	1	0	0	0	0	0	0	1	0	0	0	0	1	0	0	0
urban	7	5	71	male	11	157	50	20.2848	0	0	1	0	0	0	0	0	0	1	1	0	0	0	0	0	0	0	0	1	0	1	0	0	0
urban	2	4	23	male	11	157	48	19.4734	0	0	1	0	1	0	1	0	0	1	0	1	0	1	1	0	1	0	0	1	1	0	0	0	0
urban	4	5	46	female	11	157	40	16.2278	0	0	0	0	0	0	0	0	0	1	1	1	0	0	0	0	0	0	0	0	0	1	0	0	0
urban	8	5	83	female	11	157	43	17.4449	0	1	1	1	1	0	1	0	0	1	1	0	0	1	1	1	1	0	0	0	1	0	0	0	0
urban	1	5	15	female	11	157	46	18.662	0	1	1	0	1	0	0	0	1	1	1	1	0	0	1	0	1	0	0	1	1	0	0	0	0
urban	1	5	14	female	10	157	41	16.6335	0	1	0	0	1	0	1	0	0	1	0	0	0	0	0	1	0	0	0	0	1	0	0	0	0
urban	7	5	74	female	10	157	35	14.1994	0	0	1	0	1	0	0	0	0	1	1	1	0	0	1	0	1	0	0	1	1	0	0	0	0
urban	1	5	16	female	10	157	30	12.1709	0	0	0	0	0	0	0	0	0	1	0	0	0	0	0	0	0	0	0	1	1	0	0	0	0
urban	8	5	84	male	10	157	34.5	13.9965	0	0	1	0	0	0	0	0	0	1	0	1	0	0	1	0	1	0	0	1	1	1	1	0	0
urban	2	4	23	female	10	157	40.5	16.4307	0	1	0	0	1	0	1	0	1	1	1	1	0	1	0	0	0	0	0	0	1	0	0	1	0
urban	2	4	22	female	9	157	46	18.662	0	1	1	1	1	0	1	0	1	1	0	0	0	1	0	0	1	1	1	1	1	0	0	0	0
urban	7	5	73	female	11	157.5	53	21.3656	0	1	0	0	1	0	1	0	0	1	0	1	0	1	0	0	1	0	0	0	0	1	0	0	0
urban	1	5	16	male	11	158	40	16.0231	0	0	1	0	0	0	0	0	0	1	0	0	0	0	0	0	0	0	1	1	1	0	0	0	0
urban	4	5	45	male	11	158	40	16.0231	0	0	0	0	0	0	1	0	0	1	1	0	0	0	0	0	0	0	0	0	1	0	0	0	0
urban	7	5	71	male	11	158	42	16.8242	0	1	1	0	0	0	1	0	1	1	0	1	0	0	0	0	1	1	0	1	1	0	0	0	0
urban	2	5	26	female	11	158	38	15.2219	0	1	1	0	1	0	1	0	1	1	0	0	0	1	1	0	1	1	0	1	1	0	0	1	0
urban	7	5	72	male	11	158	33	13.219	0	0	0	0	0	0	0	0	0	1	0	1	1	0	0	0	0	0	0	0	1	0	0	0	0
urban	4	5	45	female	11	158	40	16.0231	0	0	0	1	0	0	0	0	0	1	0	0	0	0	0	0	1	0	0	0	1	0	0	0	0
urban	8	5	83	male	11	158	48	19.2277	0	0	0	0	1	0	1	0	1	1	1	1	0	0	0	0	0	0	1	1	1	1	1	0	0
urban	8	5	84	female	11	158	38	15.2219	0	0	0	0	1	0	1	0	0	1	0	1	0	1	1	0	1	0	0	0	1	0	0	0	0
urban	3	5	34	female	11	158	46	18.4265	0	1	0	0	0	0	0	0	0	1	0	0	0	0	0	0	0	0	0	0	1	0	0	0	0
urban	3	5	34	female	11	158	56	22.4323	0	1	1	0	1	0	1	0	0	1	0	0	0	1	1	0	1	0	0	0	1	0	0	0	0
urban	7	5	71	male	11	158	52	20.83	0	0	1	0	1	0	0	0	1	1	0	1	0	0	1	0	1	0	0	0	0	1	0	1	0
urban	4	5	48	male	11	158	35	14.0202	0	0	0	0	1	0	0	0	0	1	0	1	0	0	0	0	1	0	1	0	1	0	0	0	0
urban	4	5	46	male	10	158	31	12.4179	0	1	1	1	1	0	0	0	0		1	1	0			0	1	0	0	1	1	0	0	0	0
rural	5	5	54	female	10	158	30	12.0173	0	0	0	0	1	0	0	0	0	1	0	1	1	0	0	0	1	0	0	1	1	0	0	0	0
urban	2	4	22	female	9	158	42.5	17.0245	0	0	0	0	1	0	0	0	0	0	1	1	0	0	0	0	1	0	0	0	1	0	0	0	0
urban	7	5	73	female	11	158	43	17.2248	0	0	1	1	0	0	0	0	1	1	0	0	0	0	1	0	1	0	0	0	1	0	0	0	0
urban	4	5	47	male	11	159	39	15.4266	0	0	1	1	1	0	1	0	0	1	1	1	0	0	1	1	1	1	0	1	1	0	0	0	0
urban	8	5	84	female	11	159	36	14.2399	0	1	0	1	1	0	1	0	0	1	0	1	0	1	0	1	1	0	0	0	1	1	1	0	0
urban	7	5	71	male	11	159	44	17.4044	0	1	1	0	1	0	1	0	0	1	0	1	0	0	0	0	0	0	0	1	0	1	0	0	0
urban	4	5	45	male	11	159	36	14.2399	0	1	1	1	0	0	1	0	0	1	0	1	0	1	0	1	0	0	0	0	1	0	0	0	0
urban	4	5	46	male	10	159	40	15.8222	0	0	0	0	0	0	0	0	0	1	1	1	0	0	0	1	0	0	1	0	0	1	0	0	0
urban	4	4	41	male	10	159	37.5	14.8333	0	1	0	1	0	0	0	0	0	1	0	1	0	0	0	1	0	1	0	1	1	0	1	0	0
urban	4	5	48	male	10	159	40	15.8222	0	1	1	0	0	0	0	0	0	1	1	0	0	0	0	0	0	0	0	0	1	1	0	0	0
rural	6	4	62	female	10	159	33	13.0533	0	1	1	1	0	0	0	0	0	1	0	0	0	0	0	0	0	0	0	1	1	0	1	0	0
urban	4	5	48	female	12	160	41	16.0156	0	0	0	0	1	0	1	0	1	1	0	1	0	0	0	1	0	0	1	1	1	0	0	0	0
rural	5	5	54	female	11	160	40.5	15.8203	0	0	0	0	0	0	0	0	1	1	0	0	0	0	0	1	0	0	0	1	1	0	0	0	0
rural	5	5	54	female	11	160	43	16.7969	0	1	1	0	0	0	0	0	1	1	1	1	0	0	1	0	0	0	0	1	1	0	1	0	0
urban	3	5	33	female	11	160	49	19.1406	0	1	1	0	1	0	1	0	0	1	1	1	0	1	1	0	0	1	0	1	0	1	0	0	0
rural	5	5	54	male	11	160	60	23.4375	0	0	1	0	0	0	0	0	0	1	1	1	0	0	0	0	1	0	0	1	1	1	0	0	0
urban	1	5	14	male	11	160	50	19.5312	0	1	1	0	1	0	0	0	1	1	0	0	0	0	0	0	1	0	0	1	1	0	0	0	0
urban	2	5	25	male	11	160	42	16.4062	0	0	0	0	1	0	1	0	1	0	0	1	1	0	0	0	1	0	0	0	0	1	0	1	0
urban	3	5	33	male	11	160	43	16.7969	0	0	1	0	1	0	1	0	0	1	1	1	0	0	1	0	1	0	0	0	1	0	0	0	0
urban	2	5	25	male	11	160	46	17.9688	0	0	0	0	0	1	1	1	0	1	0	0	0	1	1	0	0	1	0	0	1	0	0	0	0
urban	7	5	74	male	11	160	53	20.7031	0	1	1	0	1	0	1	0	0	1	1	1	0	1	1	1	1	1	1	0	1	1	1	0	0
urban	2	5	26	female	11	160	50	19.5312	0	1	0	0	1	0	1	0	1	1	1	1	0	1	1	0	1	0	1	0	1	0	0	0	0
urban	1	5	15	male	11	160	50	19.5312	0	0	0	0	0	0	0	0	0	1	1	1	1	0	0	0	0	0	0	0	1	0	0	1	0
urban	4	5	46	female	11	160	45	17.5781	0	0	1	0	1	0	0	0	0	1	1	1	0	1	1	0	1	0	0	0	1	0	0	0	0
urban	4	5	45	male	11	160	50	19.5312	0	0	0	0	0	0	0	0	0	1	0	1	0	0	0	0	0	0	0	1	1	0	0	0	0
urban	2	5	25	male	11	160	54	21.0938	0	1	0	0	1	0	1	0	1	1	0	0	1	1	1	0	1	0	0	0	1	0	1	0	0
rural	6	5	63	female	11	160	56	21.875	0	1	0	1	1	0	0	0	0	1	1	1	1	0	0	1	1	0	0	0	1	0	0	0	0
urban	7	5	74	female	11	160	59	23.0469	0	0	1	1	1	0	1	0	0	1	0	0	0	1	1	1	1	1	0	1	0	1	0	1	0
urban	7	5	71	male	11	160	51.5	20.1172	0	0	1	0	0	0	0	0	0	1	1	1	0	0	0	0	0	0	0	1	1	1	0	0	0
urban	2	5	25	female	10	160	40	15.625	0	1	1	0	1	0	1	0	1	1	1	0	0	0	1	0	1	1	0	1	1	0	0	0	0
urban	4	4	41	female	10	160	31	12.1094	0	1	1	0	1	0	1	0	0	1	1	1	0	1	0	0	1	0	0	0	1	1	0	0	0
urban	2	4	21	female	9	160	53	20.7031	0	0	0	0	1	0	0	0	0	1	0	1	0	0	0	0	0	1	1	1	0	1	0	0	0
urban	2	5	26	female	11	161	51	19.6752	0	0	1	0	0	0	1	0	1	1	0	0	1	0	1	0	1	0	0	0	1	0	1	0	0
urban	8	5	83	female	11	161	45	17.3604	0	0	0	0	1	0	0	0	1	1	0	1	0	1	0	0	1	0	1	0	1	0	0	0	0
urban	1	5	16	female	11	161	40	15.4315	0	0	1	0	1	0	1	0	0	1	0	1	0	0	0	0	0	0	0	1	1	1	0	1	0
urban	1	5	14	female	11	161	46	17.7462	0	0	1	0	1	0	1	0	0	1	0	0	0	0	0	0	0	0	0	1	1	0	1	0	0
urban	7	5	73	female	11	161	44	16.9747	0	0	0	1	1	0	1	0	1	1	0	1	0	1	1	0	0	0	0	0	0	1	0	0	0
urban	1	5	15	female	11	161	41	15.8173	0	1	1	1	1	0	1	0	0	1	1	1	0	1	1	1	1	0	0	1	1	0	0	0	0
urban	7	5	71	male	11	161	60	23.1473	0	0	0	1	0	0	0	0	0	1	1	1	0	0	0	0	0	0	0	1	0	1	0	0	0
urban	3	5	33	male	11	161	40	15.4315	0	0	0	0	0	0	0	0	0	1	1	1	0	0	0	0	0	0	0	0	0	1	0	0	0
urban	7	5	73	female	11	161.5	52	19.9369	0	1	0	1	1	0	1	0	0	1	1	1	0	1	1	1	1	0	0	0	1	0	0	0	0
rural	5	5	53	male	11	162	39	14.8605	0	1	0	0	0	0	1	0	0	1	0	1	1	0	0	0	0	0	0	1	1	0	0	0	0
urban	8	5	83	female	11	162	41	15.6226	0	0	1	0	1	0	1	0	0	1	0	0	0	0	1	0	1	0	0	1	0	1	0	0	0
urban	8	5	84	male	11	162	26	9.90703	0	0	0	0	0	0	0	0	0	1	1	1	0	0	0	0	0	0	0	0	1	0	0	0	0
urban	4	5	45	male	11	162	50	19.052	0	0	1	0	1	0	1	0	0	1	1	0	0	0	0	0	1	0	0	1	1	0	1	0	0
urban	4	5	45	female	11	162	40	15.2416	0	0	0	0	1	0	0	0	0	1	1	1	0	0	0	0	0	0	0	0	1	0	0	0	0
urban	7	5	74	female	11	162	48	18.2899	0	1	1	1	1	0	1	0	0	1	0	1	0	0	1	1	1	1	0	1	0	1	0	0	0
urban	3	5	33	female	11	162	43.5	16.5752	0	0	0	0	1	0	1	0	0	1	1	1	0	0		0	1	1	0	1	1	0	0	0	0
urban	7	5	71	female	11	162	40	15.2416	0	0	1	0	1	0	0	0	1	1	1	1	1	1	1	0	1	0	1	1	1	1	0	0	0
urban	7	5	72	male	11	162	44.5	16.9563	0	1	1	0	1	0	1	0	0	1	1	1	0	0	0	0	0	0	0	1	1	0	0	0	0
urban	4	5	45	male	11	162	49	18.6709	0	0	1	0	1	0	0	0	0	1	1	0	0	0	1	0	0	1	0	1	1	1	0	0	0
urban	8	5	84	male	11	162	40	15.2416	0	1	1	0	0	0	1	0	0	1	1	0	0	0	0	0	0	0	0	0	1	0	0	0	0
urban	4	5	46	male	11	163	50	18.8189	0	0	1	1	0	0	1	0	0	1	0	1	0	0	0	0	0	0	1	0	1	0	0	0	0
urban	2	5	26	male	11	163	41	15.4315	0	1	1	0	0	0	0	0	0	1	0	1	0	0	0	0	0	0	0	0	1	0	0	0	0
urban	1	5	16	female	11	163	46	17.3134	0	1	0	0	1	0	0	0	0	1	0	1	0	1	0	0	0	0	0	1	0	1	0	0	0
urban	7	5	71	male	11	163	51	19.1953	0	1	1	0	1	0	1	0	0	1	1	1	0	1	0	0	1	0	0	1	0	1	1	0	0
urban	8	5	83	male	11	163	54	20.3244	0	1	1	1	0	0	1	0	1	1	0	0	0	1	1	1	1	0	0	1	1	1	0	0	0
urban	3	5	34	male	11	163	52	19.5717	0	1	1	0	1	0	1	0	1	1	0	1	0	0	1	1	1	0	0	0	1	0	1	0	0
urban	4	5	48	male	11	163	45	16.937	0	1	0	0	1	0	1	0	1	1	0	0	0	1	1	1	1	0	0	1	1	1	1	0	0
urban	8	5	84	female	11	163	55	20.7008	0	0	0	0	1	0	1	0	0	1	0	1	0	0	0	0	0	0	0	0	0	1	0	0	0
urban	2	5	25	female	10	163	50	18.8189	0	0	0	0	0	0	0	0	0	1	1	1	0	0	0	0	0	0	0	0	0	1	0	0	0
urban	7	5	73	male	11	164	49	18.2183	0	1	0	0	1	0	1	0	1	1	1	1	0	0	1	0	1	0	0	1	1	0	0	0	0
urban	1	5	16	male	11	164	43	15.9875	0	1	1	0	0	0	1	0	0	1	1	1	0	1	0	1	1	0	0	1	1	1	1	0	0
urban	8	5	84	female	11	164	35	13.0131	0	0	0	0	0	0	1	0	0	1	0	0	0	0	0	0	0	1	0	0	0	1	0	0	0
urban	8	5	83	male	11	165	46	16.8962	0	1	1	0	1	0	0	0	0	1	1	0	0	1	1	1	1	0	0	1	1	0	0	0	0
urban	4	5	46	female	10	165	45	16.5289	0	0	1	0	0	0	0	0	0	1	1	1	0	0	0	0	0	0	0	0	0	1	0	0	0
urban	2	5	24	female	11	166	55	19.9594	0	1	1	0	1	0	1	0	0	1	0	1	0	0	0	0	1	0	0	1	0	0	0	0	0
urban	4	5	48	male	11	166	37	13.4272	0	0	1	0	1	0	1	0	0	1	0	1	0	0	1	0	1	0	1	0	1	0	0	0	0
urban	4	5	47	male	11	167	50	17.9282	0	0	1	0	0	0	0	0	1	1	1	1	0	0	0	0	0	0	0	0	1	0	0	0	0
urban	3	5	33	male	11	167	60	21.5139	0	0	0	0	0	0	1	0	1	1	0	0	0	1	0	0	0	1	1	1	1	0	0	0	0
urban	4	5	47	female	11	167	46	16.494	0	1	0	0	0	0	1	0	1	1	0	1	0	0	0	0	0	0	0	0	0	1	0	0	0
urban	4	5	45	female	11	167	45	16.1354	0	0	1	0	1	0	1	0	0	1	0	1	0	0	1	0	1	0	0	0	1	0	0	0	0
urban	4	4	41	female	10	167	51	18.2868	0	1	1	0	1	0	1	0	0	1	0	1	0	1	1	0	1	0	1	0	0	1	1	0	0
urban	7	5	74	female	11	168	55.5	19.6641	0	0	1	0	1	0	1	0	0	1	0	1	0	0	0	1	1	1	0	0	1	0	0	0	0
urban	4	5	45	male	11	169	52	18.2066	0	1	0	0	1	0	1	0	0	1	1	1	0	1	0	0	0	0	0	0	1	0	0	0	0
urban	8	5	83	male	11	169	54	18.9069	0	0	1	1	1	0	1	0	0		1	0	0	0	0	0	1	0	0	1	1	0	0	1	0
urban	3	5	33	male	11	170	50	17.301	0	1	1	1	1	0	1	0	1	1	0	1	0	1	1	0	0	0	0	0	0	1	0	0	0
urban	4	5	48	male	11	170	60	20.7612	0	0	1	0	1	0	1	0	0	1	0	1	0	0	0	0	1	0	0	0	1	1	1	0	0
urban	8	5	83	female	11	170	65	22.4914	0	0	1	0	1	0	1	0	0	1	0	0	0	0	1	0	1	0	0	0	1	0	0	0	0
urban	4	4	44	male	9	172	30	10.1406	0	1	1	0	0	0	1	0	0	1	1	1	0	1	0	0	0	0	0	0	0	1	0	0	0
urban	1	5	16	male	11	180	70	21.6049	0	0	0	0	0	0	0	0	0					0	0	1	0	0	0	0	1	0	1	0	0
urban	2	4	21	male	10	100	45	45	1	0	0	0	0	0	0	0	0		0	1	0	0	0	0	0	0	0	0	0	1	1	0	0
rural	6	4	62	male	10	100	30	30	1	1	0	0	1	0	0	0	0	1	1	1	0	0	0	0	1	0	0	1	1	0	1	0	0
urban	3	4	32	female	10	102	30	28.8351	1	0	0	0	1	0	0	0	0	1	0	1		0	0		1	0		1	1	1	0	0	0
urban	8	4	82	female	10	102	41	39.4079	1	0	0	0	0	0	0	0	0	1	1	1	0	0	0	0	0	0	0	0	1	0	0	0	0
urban	2	4	23	male	10	104	42	38.8314	1	0	1	0	1	1	1	0	0	0	0	0	1	0	1	0	1	1	0	1	1	0	0	1	0
urban	4	4	42	female	9	104	34	31.4349	1	0	1	0	1	0	1	0	0	1	0	0	1	0	1	0	1	0	0	1	0	1	0	0	0
rural	5	4	52	male	10	105	27	24.4898	1	1	1	0	0	0	1	0		1	0	0	1	1	0	0	0	0	0	0	1	0	1	1	0
urban	1	5	16	male	11	107	37.5	32.754	1	0	0	1	1	0	0	0	0	1	1	0	0	0	0	0	1	0	1	1	1	1	0	0	0
urban	4	4	44	female	10	114	32	24.623	1	0	0	1	0	0	1	0	0	0	0	0	0	0	0	0	1	0	0	1	1	1	0	0	0
rural	5	4	52	female	10	125	39	24.96	1	1		0	0	0	0	0	1	1	1	0	1	0	1	0	1	1	1	1	1	0	1	1	0
urban	4	5	48	male	11	130	54	31.9527	1	1	1	1	1	0	1	0	1	1	0	1	0	1	1	0	1	0	0	1	0	1	0	0	0
urban	1	4	11	female	10	130	42	24.8521	1	0	1	0	1	0	1	0	1	1	0	0	0	0	1	0	1	0	0	1	1	0	1	1	0
urban	3	4	32	male	10	130	52	30.7692	1	0	0	0	0	1	0	0	0	1		0	0	0	0	0	0	0	0	1	1	0	0	0	0
rural	5	4	51	female	9	130	40	23.6686	1	0	0	0	0	0	0	0	0	0	0	0	0	0	0	0	0	0	1	0	0	1	0	1	0
urban	3	4	31	male	10	130	39	23.0769	1	1	1	1	1	0	1	0	0	1	0	0	0	1	0	1	1	0	0	1	1	1	0	0	0
urban	2	5	26	male	11	131	61	35.5457	1	0	0	0	0	0	0	0	0	1	0	1	0	0	0	0	0	0	0	0	1	0	0	0	0
urban	1	4	13	female	10	132	40	22.9568	1	0	0	0	1	0	0	0	0	1	1	0	0	0	0	0	0	0	0	1	1	0	0	0	0
urban	2	4	23	male	10	132	41	23.5308	1	1	1	0	1	0	1	0	0	1	0	1	0	1	1	0	0	1	0	0	1	0	0	0	0
urban	1	4	12	female	9	132	40	22.9568	1	0	1	1	1	0	1	0	1	1	0	0	0	1	0	0	1	0	0	1	1	0	0	0	0
rural	6	4	61	female	10	135	53	29.0809	1	0	0	0	1	0	1	0	1	1	0	1	0	0	0	0	1	0	0	0	1	0	0	0	0
rural	6	4	61	male	9	135	45	24.6914	1	1	1	1	0	0	0	0	0	1	0	1	0	0	1	0	0	0	0	1	1	0	0	1	0
rural	6	4	61	male	10	135	45	24.6914	1	0	1	0	1	1	0	1	0	1	0	0	1	0	0	0	0	0	0	1	1	0	1	0	0
urban	1	4	11	male	10	136	54	29.1955	1	0	0	0	0	0	1	0	0	1	0	0	0	0	0	0	0	0	0	1	1	0	0	1	0
urban	2	4	23	male	10	136	56	30.2768	1	0	0	0	0	0	0	0	0	1	0	1	0	0	0	0	0	0	0	1	1	1	1	0	0
rural	6	4	62	male	10	137	50	26.6397	1	1	1	1	0	0	1	0	1	1	0		0	0	0	0	0	0	0	0	1	0	0	0	0
urban	4	4	41	female	9	137	40	21.3117	1	1	1	1		0	1	0	0	1	0	1	0	1	1	1	1	1	1	1	1	1	1	0	0
urban	2	4	23	female	9	137	53	28.2381	1	1	0	0	1	0	1	0	0	1	0	0	0	0	0	0	1	0	0	1	1	0	1	0	0
urban	4	4	41	female	10	138	46.5	24.4171	1	1	0	0	1	0	0	0	0	1	0	0		1	0	1	1	0	0	0	1	1	0	0	0
urban	8	4	82	male	10	138	60	31.506	1	0	0	0	0	0	0	0	1	1	0	1	0	0	0	0	0	0	0	0	0	1	0	0	0
urban	2	4	23	female	9	139	50	25.8786	1	0	0	0	1	0	1	0	1	1	0	0	0	1	0	0	0	0	0	1	1	0	0	1	0
urban	2	4	21	female	9	139	50	25.8786	1	0	0	0	1	0	0	0	0	1	0	1	0	0	0	0	0	0	0	0	0	1	0	0	0
urban	8	5	84	male	11	140	60	30.6122	1	1	0	0	0	0	0	0	1	1	0	1	0	1	0	0	0	0	1	0	1	1	1	1	0
urban	3	5	33	male	10	140	50	25.5102	1	1	0	0	0	0	1	0	0	1	0	0	0	0	0	0	0	0	0	1	1	1	0	0	0
urban	8	4	82	female	10	140	50	25.5102	1	1	0	1	0	1	1	0	0	1	0	0	0	1	0	0	1	0	0	0	1	0	0	0	0
rural	5	4	51	male	10	140	55	28.0612	1	1	0	0	0	0	0	0	0	1	0		1	0	0	0	0	0	0	1	1	0	1	1	0
urban	2	4	21	male	10	140	60	30.6122	1	1	1	1	0	1	1	0	0	1	1	1	0	0	0	0	0	0	0	1	1	0	0	0	0
urban	3	4	31	female	10	140	45	22.9592	1	0	0	0	0	0	0	0	0	0	0	0	0	0	0	0	0	0	0	0	1	0	0	0	0
urban	2	4	21	male	10	140	60	30.6122	1	1	0	0	1	0	1	0	0	1	0	1	0	1	0	0	0	0	0	1	0	1	0	0	0
urban	8	4	82	male	9	140	50	25.5102	1	0	1	0	1	0	1	0	0	1	1	1	0	0	1	0	0	0	0	1	1	0	0	0	0
urban	2	4	21	male	10	141	56	28.1676	1	1	1	0	1	0	1	0	1	1	0	0	0	1	1	1	1	0	0	1	1	0	0	0	0
urban	1	4	11	female	10	142	45	22.317	1	1	0	0	1	0	1	0	0	1	1	0	0	0	0	0	0	0	0	1	1	0	0	0	0
urban	8	5	84	male	11	143	51.5	25.1846	1	0	0	1	1	0	0	0	0	1	0	1	0	0	0	1	1	0	1	0	1	1	0	0	0
urban	8	5	83	female	11	143	56	27.3852	1	0	1	1	0	0	0	0	1	1	0	0	0	0	0	0	0	0	0	0	1	0	0	0	0
rural	5	5	54	female	11	143	50	24.4511	1	0	0	0	0	0	0	0	1	1	0	0	0	0	0	0	0	0	0	1	1	0	0	0	0
urban	1	5	16	female	10	143	53	25.9181	1	0	0	0	1	0	0	0	0	1	1	0	0	1	0	0	1	0	0	1	0	1	1	0	0
urban	3	4	31	male	10	143	48	23.473	1	0	1	0	0	0	1	0	0	1	0	1	0	0	1	0	1	0	0	1	1	0	0	0	0
urban	1	5	14	female	10	144	49	23.6304	1	0	1	0	0	0	0	0	0	1	1	1	0	1	0	0	0	1	1	0	0	0	0	0	0
rural	5	5	53	female	11	145	55	26.1593	1	0	0	0	0	0	0	0	1	1		0	0	1	0	0	0	0	0	1	1	1	1	0	0
rural	5	5	54	male	11	145	50	23.7812	1	1	1	1	1	0	0	0	1	1	0	0	1	1	1	1	1	1	1	1	1	1	1	0	0
urban	4	4	42	male	10	145	52	24.7325	1	1	1	1	0	0	0	0	1	1	0	1	0	1	1	0	0	1	0	1	1	0	0	0	0
rural	5	4	51	female	10	145	51	24.2568	1	1	0	0	1	0	1	0	0	1	0	1	0	1	0	0	1	0	0	1	1	0	0	0	0
urban	8	4	82	male	9	145	60.6	28.8228	1	1	1	0	0	0	1	0	0	1	0	1	0	1	0	0	0	1	0	1	1	1	0	1	0
urban	1	4	12	female	9	145	45.9	21.8312	1	1	0	1	0	0	1	0	0	1	0	0	0	0	0	0	0	0	0	0			0	0	0
urban	2	4	21	male	10	146	62	29.0861	1	1	1	0	1	0	1	0	0	1	1	1	0	0	1	0	1	0	0	0	0	1	0	0	0
urban	1	5	16	male	11	147	53	24.5268	1	0	1	0	0	0	0	0	0		1	1	0	0	1	0	0	0	0	0	0	1	0	0	0
urban	1	4	12	male	10	147	56	25.9151	1	1	1	0	1	1	1	0	0	1	0	1		1	0	0	0	0	1	1	1	0	0	0	0
urban	1	4	11	male	9	147	50	23.1385	1	0	0	0	1	0	0	0	0	1	0	0	0	0	0	0	0	0	0	0			0	1	0
urban	2	5	24	female	9	147	57	26.3779	1	1	0	0	1	0	1	0	0	1	0	0	0	0	1	0	0	0	0	0	1	0	0	0	0
urban	2	4	21	male	10	148	50	22.8269	1	0	1	1	1	0	1	0	0	1	0	0	0	1	1	1	1	1	0	1	0	1	0	0	0
urban	4	4	44	male	9	148	50	22.8269	1	0	0	1	0	0	1	0	0	1	0	1	0	0	0	1	0	0	0	0	1	0	0	0	0
urban	1	5	16	female	11	149	52	23.4224	1	1	0	0	0	0	1	0	0	1	0	1	0	0	0	0	1	0	0	1	0	1	0	0	0
urban	4	5	48	male	10	149	52	23.4224	1	0	1	0	1	0	0	0	0	1	0	0	0	1	0	1	0	1	0	0	1	0	0	0	0
urban	4	5	46	male	10	149	55	24.7737	1	1	0	1	1	0	1	0	1	1	0	1	0	1	1	0	1	1	0	1	1	0	0	0	0
rural	5	5	54	male	14	150	60	26.6667	1	0	0	0	0	0	0	0	0	1	0	0	0	0	0	0	0	0	0	1	1	0	1	0	0
urban	4	5	48	male	11	150	66	29.3333	1	0	0	0	1	0	1	0	0	1	0	0	0	0	1	0	1	0	0	0	1	1	0	0	0
urban	3	5	33	male	11	150	65	28.8889	1	1	1	0	1	0	1	0	0	1	1	1	0	0	1	0	0	0	0	0	1	0	0	0	0
urban	1	5	15	male	11	150	66	29.3333	1	0	1	0	0	0	0	0	0	1	0	1	0	1	0	0	0	0	0	1	0	1	0	0	0
urban	3	5	33	female	11	150	54	24	1	1	1	0	0	0	1	0	0	1	0	0	0	0	0	0	0	0	0	1	1	1	1	0	0
urban	7	5	73	male	11	150	60	26.6667	1	1	0	1	0	0	1	0	0	1	1	1	0	0	0	0	1	0	0	0	0	1	1	0	0
urban	1	4	11	female	9	150	56	24.8889	1	1	1	0	1	0	1	0	0	1	1	1	0	0	1	0	1	0	0	1	1	0	0	1	0
urban	1	4	13	male	9	150	49	21.7778	1	0	0	1	1	0	1	1	0	1	0	0	0	0	0	1	1	0	0	0	0	1	0	1	0
urban	2	5	24	male	11	151	58	25.4375	1	1	0	0	1	0	0	0	1	0	0	1	0	1	0	0	1	0	0	0	0	1	0	0	0
urban	8	5	84	male	10	151	55	24.1217	1	0	0	0	0	0	1	0	0	1	0	0	0	0	1	0	0	0	0	1	1	0	0	0	0
urban	1	5	16	male	11	152	55	23.8054	1	1	1	0	1	0	1	0	0	0	0	0	0	1	0	0	1	0	1	0	1	0	0	1	0
urban	2	5	25	female	10	152	52	22.5069	1	0	1	0	1	0	0	0	1	1	1	0	0	0	1	0	1	0	0	1	1	1	0	0	0
urban	3	5	33	female	11	153	60	25.6312	1	0	0	0	0	0	0	0	0	1	0	0	0	0	1	1	0	1	0	0	0	1	0	0	0
urban	4	5	46	male	10	153	65	27.7671	1	1	1	0	1	1	0	0	0	1	0	1	0	1	1	0	1	1	0	1	0	1	0	0	0
urban	2	5	24	male	10	153	53	22.6409	1	1	1	1	1	0	1	0	0	1	0	0	0	0	0	0	0	0	0	0	0	1	0	0	0
urban	2	4	22	male	10	153	53	22.6409	1	1	0	0	0	1	1	0	0	1	0	1	0	0	0	0	0	0	0	1	1	1	0	0	0
urban	2	5	24	male	11	155	57	23.7253	1	0	0	0	0	0	0	0	0	1	1	1	0	0	0	0	0	0	1	0	1	0	0	0	0
urban	2	5	24	female	10	155	60	24.974	1	0	0	0	1	0	0	0	1	1	0	1	0	0	0	0	0	0	0	0	1	0	1	0	0
urban	1	5	15	female	10	155	66	27.4714	1	0	0	0	0	0	0	0	0	1	0	0		0	0	0	0	1	0	0	1	0	0	0	0
urban	4	5	47	male	11	156	60	24.6548	1	0	0	0	0	0	0	0	0	1	0	1	0	0	0	0	0	0	0	0	0	1	0	0	0
urban	1	4	11	female	10	156	55	22.6003	1	0	0	0	0	0	0	0	0	1	0	0	0	0	0	0	0	0	0	1	1	0	0	0	0
rural	5	4	52	male	8	156	50	20.5457	1			1	0	0	1	1	0	1	0	0	0	0	0	0	0	0	0	1	1	0	0	0	0
urban	4	5	46	male	11	157	60	24.3418	1	0	1	1	1	0	0	0	0	1	1	0	0	0	1	0	0	0	0	0	1	0	0	0	0
urban	2	4	23	female	10	157	61	24.7475	1	0	0	0	1	0	0	0	0	1	0	1	0	0	0	0	0	0	0	0	1	1	0	0	0
urban	7	5	71	male	11	158	60	24.0346	1	1	1	1	1	1	1	0	0	1	0	1	0	1	1	1	1	0	1	1	1	0	0	0	0
urban	2	5	26	female	11	159	60	23.7332	1	0	1	0	1	0	1	0	0	1	0	1	0	0	0	0	1	0	0	0	1	0	0	1	0
urban	1	5	14	male	10	160	60	23.4375	1	1	1	1	1	0	1	0	1	0	0	0	0	1	1	1	1	1	1	1	1	0	0	0	0
urban	1	5	15	female	11	162	66	25.1486	1	1	0	0	0	0	1	0	0	1	1	1	0	1	1	0	1	0	0	1	1	0	0	0	0
urban	4	5	46	male	11	162	67	25.5296	1	0	1	0	1	0	1	0	1	1	0	1	0	0	1	0	1	0	0	0	1	0	0	0	0
urban	1	4	13	male	9	123				0	1	0	0	0	0	0	0	1	0	0	0	0	0	0	0	0		0	1	0	0	0	0
rural	5	4	52	female	9	127				1	1	0	1	0	0	0	0	1	0	0	0	0	0	0	0	0	0	0	1	0	0	0	0
urban	3	4	32	female	10	130				1	0	0	0	0	1	0		1	1	1	0	0	0	0	0	0	0	1	1	0	0	0	0
rural	6	4	62	male	9	130				1	0	0	1	0	0	0	0	1		0	1	1	0	0	1	1	1	1	1	0	1	0	0
urban	2	4	22	female	9	130				0	0	0	0	0	0	0	0	1	0	0	0	0	0	0	0	0	0	1	0	1	0	0	0
rural	6	4	61	male	10	130				0	0	0	0	0	0	0	1	1	0	0	1	0	0	0	0	0	0	0	1	0	1	0	0
urban	2	4	22	female	10	131				1	0	0	0	0	1	1	0	1	0	0	0	0	1	1	0	1	0	0	1	0	0	0	0
urban	4	4	43	female	9	131				0	1	0	0	0	0	0	0	1	1	1	1	0	0	0	1	0	1	0	1	0	1	0	0
urban	2	4	22	male	10	133				1	1	1	1	0	1	0	0	1	0	1	0	1	1	0	1	0	0	1	1	0	0	1	0
urban	2	4	22	female	10	134				0	0	0	0	0	1	1	0	1	0	0	0	0	0	0	0	0	0	0	1	0	0	0	0
rural	6	5	63	female	11	135				1	1	0	1	0	0	0	0	1	0	1	0	1	1	0	1	0	0	0	1	0	1	0	0
rural	6	5	63	male	10	135				0	1	0	1	0	0	0	1	1	0		1	0	0	0	1	1	0	1	0	1	1	0	0
urban	8	4	82	female	10	135				1	0	0	1	0	1	0	0	1	1	0	0	1	0	0	0	0	0	0	0	1	0	0	0
urban	1	4	11	male	10	135				0	1	0	1	0	0	0	1	1	0	1	0	0	0	0	0	1	0	1	1	0	1	1	0
urban	4	4	43	female	10	135				0	1	0	1	0	1	0	0	1	0	1	0	0	0	0	1	0	0	1	1	0	0	0	0
urban	2	5	25	female	10	137				0	1	0	1	0	1	0	0	1	0	0	0	0	1	0	1	0	0	1	1	0	0	0	0
urban	8	4	81	male	10	137				0	0	0	1	0	1	0	0	1	0	1	0	1	0	0	1	0	0	0	0	1	0	0	0
urban	1	4	11	male	9	137				0	0	0	0	0	0	0	0	1	1	1	0	0	0	0	0	0	0	0	1	0	0	0	0
rural	6	4	62	female	9	137				1	1	0	1	0	0	0	1	1	0	0	0	0	0	0	0	0	0	1	1	0	1	1	0
urban	8	4	81	female	10	138				0	0	0	1	0	1	0	0	1	0	1	0	0	0	0	1	0	0	0	1	0	0	0	0
rural	5	4	52	male	9	138				1	0	0	0	0	0	0	0	1		0	0	0	0		0	0	0	1	1	0	0	0	0
urban	2	4	22	female	10	139				1	1	0	1	0	1	0	0	1	0	1	0	0	0	0	0	0	0	0	0	1	0	0	0
urban	1	4	11	female	10	140				1	0	1	0	0	1	1	1	1	0	0	0	0	0	0	0	0	0	0	1	0	1	0	0
urban	3	4	32	female	10	140				0	0	0	0	0	0	0	1	1	1	1	0	0	0	0	0	0	0	1	1	0	0	0	0
urban	1	4	13	male	10	140				1	0	0	1	0	0	0	0	1	0	1	0	1	0	0	1	0	0	1	1	0	0	0	0
rural	6	4	61	male	10	140				1	1	1	1	1	1	1	0	1	1	1	0	1	0	1	1	1	1	1	1	0	1	0	0
urban	1	4	12	male	10	140				1	1	0	0	0	1	0	1	1	0	1	0	1	1	0	0	1	0	1	0	1	1	0	0
urban	8	4	81	female	10	140				0	0	0	0	0	0	0	0	1	0	1	0	0	0	0	0	0	0	1	1	1	0	0	0
rural	6	4	62	male	9	140				0	0	0	0	0	0	0	0	0		0	0	0	0	0	0	0	0	1	0	1	1	0	0
urban	3	4	31	female	9	140				0	0	0	0	0	0	0	0	1	0	0	0	0	0	0	0	0		0	1	1	1	0	0
urban	7	5	73	male	11	141				1	1	1	1	0	0	0	0	1	0	1	1	1	1	0	0	1	0	0	0	1	0	1	0
urban	1	4	13	female	10	141				0	0	0	1	0	0	0	0	1	0	1		0	0	0	1	0	0	1	1	0	0	1	0
urban	8	5	83	male	10	142				0	1	1	0	0	0	0	0	1	1	1	0	0	1	0	0	0	0	0	0	1	0	1	0
urban	1	5	15	female	10	143				1	1	0	0	0	0	0	0	1	0	0	0	1	1	0	1	0	0	0	1	0	0	0	0
rural	5	4	52	male	10	143				1	0	0	0	0	0	0	0		0	1	0	0	0	0	0	1	0	0	1	0	0	0	0
rural	5	4	52	female	10	143				1	0	0	1	0	0	0	0	1	0	0	1	0	0	0	1	1	0	1	1	0	1	0	0
urban	1	4	13	male	9	143				0	0	1	0	0	1	0	0	1	0	1	0	0	0	0	0	0	0	0	0	1	0	1	0
urban	2	5	26	male	10	144				1	1	1	1	0	0	0	0	1	1	1	0	1	1	1	1	0	0	1	1	0	0	0	0
urban	4	4	43	male	10	144				0	0	0	0	0	0	0	0	1	0	1	0	0	1	0	0	0	0	0	0	1	0	0	0
urban	3	4	32	female	11	144				1	0	0	1	0	1	0	0	1	0	0	0	0	0	0	0	0	0	1	1	0	0	0	0
rural	6	5	64	male	11	145				0	0	0	0	0	0	0	0	1	0	1	0	0	0	0	0	0	0	1	1	0	0	0	0
urban	4	5	45	male	11	145				1	1	1	0	0	1	0	0	1	1	0	0	0	0	1	0	0	0	0	0	1	1	0	0
rural	6	5	64	male	11	145				0	0	0	0	0	0	0	1	1	0	0	1	0	0	0	0	0	0	1	0	0	1	0	0
urban	2	5	25	male	10	145				0	0	0	0	0	0	0	0	1	0	0	0	0	0	0	0	0	0	1	0	1	0	0	0
rural	5	4	51	female	10	145				0	0	0	1	0	0	0	1	1	1		1	0	0	0	1	0	0	1	1	0	0	0	0
urban	1	4	13	female	10	145				1	1	1	1	0	1	0	1	1	0	0	0	1	0	1	1	1	0	1	0	1	0	0	0
rural	6	4	62	male	10	145				1	0	0	1	0	0	0	0	1	0	0	1	0	0	0	1	0	0	1	1	0	1	0	0
rural	5	4	51	male	10	145				1	0	0	0	0	1	0	0	1	1	1	0	0	0	0	0	0	0	0	0	1	1	1	0
urban	8	4	81	male	10	145				1	1	0	1	0	1	0	0	1	1	0	0	1	1	0	1	0	0	1	0	1	0	0	0
rural	6	5	64	female	11	147				1	1	0	1	0	0	0	0	1	0	1	1	1	1	1	1	1	0	1	1	0	0	0	0
urban	3	5	34	female	11	148				0	0	0	1	0	1	0	0	1	0	1	0	1	1	0	1	0	0	1	1	0	1	0	0
urban	4	4	42	male	10	148				0	1	0	0	1	1	0	0	1	0	0	0	0	0	0	0	0	0	0	1	1	0	0	0
rural	5	4	52	female	10	148				0	1	0	0	0	0	0	0	1	0	0	0	0	0	0	1	0	0	1	1	0	0	0	0
urban	4	4	41	male	9	148				0	1	0	1	0	0	0	0	1	0	1	0	0	1	0	1	0	0	0	1	0	0	0	0
urban	2	4	22	male	9	148				1	1	0	0	0	1	0	1	1	1	0	0	0	0	0	0	0	0	0			0	0	0
urban	4	4	43	male	10	148				0	1	1	1	0	1	0	0	0	0	0	0	0	0	0	1	1	0	0				0	0
rural	6	5	64	male	11	150				0	0	0	1	0	0	0	0	1	1	1	1	0	1	0	0	0	0	1	1	0	0	0	0
rural	5	5	54	female	11	150				1	1	0	1	0	0	0	0	1	1	1	0	1	1	0	1	0	0	0	1	0	0	0	0
urban	2	4	23	female	11	150				0	0	0	0	0	0	0	0	1	0	0	0	0	0	0	0	0	0	1	1	1	1	0	0
urban	4	5	47	female	11	150				1	0	0	1	0	1	0	0	1		0	0	1	0	0	1	0	0	0	1	0	0	0	0
rural	6	5	64	male	11	150				0	0	0	1	0	0	0	1	1	1	1	0	0	0	1	1	0	0	1	1	0	1	0	0
rural	6	5	64	female	10	150				1	0	0	1	0	1	0	0	1	0	1	0	1	0	0	1	0	0	1	1	0	1	0	0
urban	1	4	13	male	10	150				1	1	0	0	0	0	0	0	1	1	0		1	0	0	0	1	1	1	1	1	1	1	0
urban	7	5	73	male	12	150				1	1	1	1	1	1	1	0	1	0	0	0	0	0	1	1	0	0	0	1	0	0	1	0
urban	4	5	48	female	11	151				0	1	0	0	0	0	0	1	1	0	0	0	1	1	1	1	1	1	0	1	0	1	0	0
urban	1	4	13	female	10	151				0	0	0	1	0	0	0	0	1	0	0		1	1	0	1	0	0	1	1	0	0	1	0
urban	1	5	15	female	10	152				0	0	0	1	0	1	0	0	1	0	1	0	1	1	0	1	0	0	1	1	0	0	0	0
urban	7	5	71	female	10	152				0	1	1	0	0	0	0	0	1	1	1	0	0	1	1	1	0	0	0	1	0	0	0	0
urban	1	4	11	male	10	152				0	0	0	0	0	0	0	0	1	0	0	0	0	0	1	1	0	0	0	1	0	1	1	0
urban	7	5	73	male	11	153				1	1	1	1	0	0	0	0	1	1	1	0	0	1	1	1	0	0	0	0	1	0	0	0
urban	3	5	33	female	10	153				0	1	0	0	0	0	0	0	1	0	1	0	0	0	0	0	0	0	1	1	0	1	0	0
urban	2	4	21	female	10	153				0	0	0	0	0	0	0	0	1	1	1	0	0	0	0	0	0	0	0	1	1	0	0	0
urban	1	5	15	male	10	155				0	1	0	1	0	0	0	0	1	0	1	0	1	1	0	1	0	0	1	0	1	0	0	0
urban	2	4	22	male	10	155				0	0	0	0	0	0	0	0	1	0	0	0	0	0	0	0	0	0	0			0	0	0
urban	4	5	48	male	11	158				1	1	1	0	0	1	0	0	1	0	1	0	0	1	0	0	0	0	0	0	1	0	0	0
urban	8	5	84	female	11	159				0	1	0	0	0	0	0	1	1	0	1	0	0	0	0	1	1	0	1	1	1	0	0	0
urban	8	5	84	male	11	160				0	0	0	1	0	0	0	0	1	0	1	0	0	0	0	1	0	1	0	1	1	0	0	0
urban	4	4	43	male	10	160				1	1	0	1	1	1	0	0	1	0	0	0	0	1	0	1	1	1	0	0	1	0	0	0
urban	1	5	15	female	10	162				0	1	0	1	0	1	0	0	1	1	1	0	0	0	0	1	0	1	1	1	0	0	0	0
urban	1	5	15	male	10	163				0	1	0	1	0	1	0	1	1	0	0	0	0	0	0	0	0	0	0			0	0	0
urban	4	4	43	female	10	163				0	1	0	1	0	1	0	1	1	0	0	0	0	1	0	1	0	0	1	1	0	0	0	0
urban	1	5	16	male	12					0	1	0	0	0	0	0	1	1	0	0	0	1	0	1	0	0	0	0	1	0	0	0	0
rural	6	5	64	male	11					1	0	0	1	0	1	0	1	1	1	1	0	0	0	0	1	0	1	1	1	0	0	0	0
urban	1	5	15	male	11					1	1	0	1	0	1	0	0	1	0	0	0	1	0	0	1	0	0	1	1	0	0	0	0
urban	1	5	14	male	11					1	1	0	1	0	1	0	0	1	0	0	0	0	0	0	1	0	0	0	1	0	1	0	0
rural	6	5	64	female	11					1	1	0	1	0	1	0	1	1	1	1	0	1	1	0	1	0	1	1	1	0	1	1	0
rural	6	5	64	female	11					0	0	0	1	0	0	0	0	1	0	0	1	0	0	0	1	0	0	1	1	0	1	0	0
urban	4	5	45	female	11					1	1	1	1	0	1	0	1	1	0	0	0	0	0	0	0	0	0	0	1	0	0	0	0
urban	1	5	14	male	11					0	0	0	1	0	1	0	1	1	0	0	0	1	1	0	1	0	0	1	1	0	0	0	0
urban	3	5	34	male	11					1	0	0	1	0	1	0	0	1	0	0	0	1	1	0	1	0	0	1	1	0	0	0	0
rural	6	5	64	female	11					1	1	1	1	0	1	0	0	1	0	0	0	1	0	1	1	0	0	1	1	0	1	0	0
urban	3	5	33	female	11		50			1	0	0	0	0	0	0	0		0		0	0	0	0	0	0	0	1	0	1	0	0	0
urban	7	5	71	male	11					0	1	0	1	0	0	0	1	1	0	1	0	0	0	0	1	0	0	0	0	1	0	0	0
urban	2	5	25	male	11		30			0	0	1	0	0	1	0	1	1	0	0		0	0	0	0	0	0	0	1	1	0	0	0
rural	6	5	64	male	11					0	0	0	0	0	0	0	0	1	0	1	1	0	0	0	0	0	0	0	1	0	0	0	0
urban	4	5	47	male	11					0	1	0	1	0	1	0	1	1		0	0	0	1	0	1	0	0	0	1	0	1	0	0
urban	4	5	46	male	11		39			0	0	0	0	0	1	0	0	1	0		0	0	0	0	0	0	1	1	0	1	0	0	0
rural	6	5	64	female	11					0	0	0	0	0	0	0	0	1	0	0	1	0	0	0	0	0	0	0	1	0	0	0	0
urban	1	5	16	male	11					1	1	0	1	0	1	1	1	1	0	0	0	1	0	0	1	0	0	1	1	0	0	0	0
urban	1	5	14	male	11					1	1	0	1	0	0	0	0	1	0	1	0	0	1	1	0	0	1	1	1	0	0	0	0
urban	1	5	14	female	11					1	1	0	1	0	1	0	1	1	0	0	0	1	1	0	1	1	0	1	1	0	1	0	0
urban	2	5	25	male	11		48			0	0	0	0	0	0	0	0	1	0	0	0	0	0	0	0	1	0	0	1	0	1	0	0
urban	8	5	84	male	11					0	1	1	1	0	0	0	0	1	1	1	0	1	1	1	1	0	0	1	1	0	1	0	0
urban	1	5	14	female	11					0	0	0	1	0	0	0	0	1	0	0	0	0	0	0	0	0	0	0	1	0	0	0	0
rural	6	5	64	male	11					1	0	0	0	0	0	0	0	1		1	0	0	0	0	0	0	0	1	1	0	0	0	0
urban	4	5	45	male	11					0	1	0	0	0	0	0	0	1	0	1	0	0	1	0	0	0	0	1	1	0	0	0	0
urban	1	5	15	female	11					0	0	0	1	0	1	0	0	1	0	0	0	0	0	0	0	0	0	1	1	0	0	1	0
rural	6	5	64	male	11					0	0	1	1	0	0	0	0		0		1	0	0	0	1	0	0	1	1	0	0	0	0
urban	8	4	82	male	11					1	1	0	1	0	1	0	0	1	0	0	0	1	1	0	0	0	0	1	1	0	0	0	0
urban	1	5	15	female	11					1	1	1	1	0	1	0	1	1	0	0	0	1	1	0	1	0	0	1	1	0	1	0	0
rural	6	5	64	male	11					0	0	0	1	0	1	0	0	1	0	0	1	1	1	0	1	0	0	1	1	0	1	0	0
urban	4	5	48	female	10					1	1	0	0	0	1	0	0	1	0	1	0	1	1	0	0	1	0	0	1	0	1	0	0
urban	1	5	14	male	10		25			0	1	0	0	0	0	0	0	1	1	0	0	0	0	0	0	0	0	1	0	1	0	1	0
urban	2	5	26	female	10					1	0	0	0	0	1	1	0	1	0	1	0	0	0	0	0	0	0	1	1	0	1	0	0
urban	1	5	14	female	10					0	1	1	0	0	0	0	0	1	1	1	0	0	0	0	1	0	0	1	1	0	0	1	0
urban	4	5	47	male	10					1	1	0	1	1	1	0	0	1	0	1	0	0	0	1	0	0	0	1	1	0	1	0	0
urban	3	5	33	male	10		27			1	1	1	1	0	1	0	1	1	0	0	0	0	0	1	1	0	0	1	1	0	1	1	0
urban	4	4	42	male	10					1	0	0	1	0	1	0	1	1	0	0	0	1	0	0	0	0	0	1	1	0	0	0	0
urban	1	4	11	female	10					1	0	1	1	0	1	0	1	1	0	0	0	0	0	1	1	0	1	1	1	0	0	1	0
urban	2	5	25	female	10					0	1	0	0	0	0	0	0		1	0	0	0	1	0	0	0	0	1	1	0	1	0	0
urban	4	5	47	male	10					0	0	0	0	0	0	0	0	1	0	1	0	0	0	0	0	0	0	0	0	1	0	0	0
rural	6	5	64	male	10					0	0	0	0	0	0	0	0	1	1	1	0	1	1	0	1	0	0	1	1	0	0	0	0
rural	6	5	64	female	10					1	0	0	0	1	0	1	0	1	1	0	0	0	0	1	1	1	0	1	1	0	1	0	0
urban	1	4	11	female	10					0	0	0	0	0	0	0	0	1	1	1	0	0	0	0	0	0	0	1	1	0	0	0	0
rural	6	5	64	female	10					0	0	0	1	0	0	0	0	1		1	1	0	0	0	1	0	0	0	1	0	1	0	0
urban	1	4	12	male	10					0	1	0	0	0	0	0	0	1	0	0	0	0	0	0	0	0	0	1	1	0	0	1	0
urban	2	5	25	male	10					0	0	0	1	0	0	0	0	1	0	0	0	0	1	0	1	0	1	0	1	0	0	0	0
urban	4	4	41	male	10					1	1	0	1	1	1	1	1	1	1	0	0	0	0	0	1		0	0	1	0	0	0	0
urban	2	4	22	male	10					1	1	0	1	0	1	0	1	1	0	0	0	0	0	0	0	0	0	0		1	0	0	0
urban	2	5	25	female	10					0	1	1	0	0	0	0	1	0	0	1	0	0	1	1	0	0	0	1	1	0	0	0	0
urban	1	4	11	female	10					1	1	1	0	0	1	0	0	1	0	0	0	0	1	1	0	0	0	1	1	0	0	1	0
urban	1	4	13	female	10					0	1	0	1	0	1	0	1	1	0	0	0	0	0	0	0	0	0	1	1	0	1	0	0
urban	8	4	82	female	10					1	0	0	1	0	1	0	0	1	0	0	0	0	0	0	0	0	1	0	1	0	0	1	0
urban	4	4	43	male	10					0	0	0	1	1	1	0	0	1		1	0	0	0	0	0	0	0	0	0	1	0	0	0
urban	1	4	12	female	10					0	0	0	1	0	1	0	1	1	0	0	0	0	0	0	1	0	0	1	1	0	0	0	0
urban	3	4	31	male	10		30			0	1	0	1	0	0	0	0	1	0	0	0	0	1	0	1	0	0	1	1	0	1	0	0
urban	1	4	13	male	10					1	1	1	1	1	1	0	0	1	0	1	0	0	0	0	1	1	0	0	1	0	0	0	0
urban	1	4	11	female	10					1	1	0	1	0	1	0	0	1	1	0	0	1	1	0	0	0	0	1	1	0	0	0	0
urban	4	4	43	male	10					0	0	0	0	1	1	1	1	1	0	0		0	0	0	0	1	1	1	1	1	0	0	0
urban	1	4	13	female	10					1	1	1	1	0	0	0	1	1	0	0	0	1	1	1	1	0	0	1	1	1	0	0	0
urban	4	4	43	male	10					1	0	0	0	0	0	0	0	1	0	1	0	0	0	0	1	0	0	0	1	0	1	0	0
urban	8	4	82	female	10					0	0	0	1	0	1	0	0	1	0	1	0	0	0	0	0	0	0	1	1	0	0	0	0
urban	4	4	43	female	10					1	0	0	0	0	1	0	0	1	0	1	0	0	0	0	0	0	1	1	0	1	0	0	0
urban	4	4	41	male	10					1	0	0	1	0	0	0	0	1	0	0	1	0	0	0	0	1	0	1	1	0	0	0	0
urban	1	4	13	female	10					0	0	0	0	0	0	0	0	0	0	0	0	0	0	0	0	0	0	1	1	0	0	0	0
urban	2	4	21	female	10					1	0	1	1	0	1	0	0	1	0	0	0	1	1	0	1	1	0	0	0	1	1	0	0
urban	4	4	43	male	10					1	0	0	1	0	1	1	0	0	0	1	0	0	0	0	0	0	0	0	1	1	0	0	0
urban	2	4	22	male	10					0	0	0	0	0	0	0	1	0		1	0	0	0	0	0	0	0	0			0	0	0
urban	1	4	11	male	9					0	0	0	0	0	0	0	0	1			0	0	0	1	1	0	0	0	1	0	0	0	0
urban	3	4	32	female	10					0	0	0	0	0	0	0	0	1	1	0	0	1	0	1	1	0	0	1	1	0	0	0	0
urban	8	4	81	male	10					1	1	1	0	0	0	0	0	1		0	0	0	0	1	0	0	0	0	0	1	0	0	0
urban	4	4	43	female	9					0	1	1	1	0	1	0	1	1	0	0	0	0	1	0	1	1	0	1	0	1	0	0	0
urban	4	4	43	male	9		29			0	1	0	1	0	1	0	0	1	0	1	0	0	0	0	1	0	1	0	1	0	0	0	0
urban	1	4	11	male	9		50			1	0	1	1	0	1	0	1	0	0	0	0	1	0	0	0	0	0	0	1	0	0	1	0
urban	3	4	32	male	9					1	0	0	1	0	1	0	0	1		1	0	0	0	0	0	0	0	1	1	0	0	0	0
urban	2	4	22	male	9		40			0	0	0	1	0	1	0	0	1	0	0	0	0	0	0	1	0	0	1	1	0	0	0	0
rural	5	4	51	female	9					1	0	1	1	0	0	0	0	1		0	1	0	0	0	0	1	1	1	1	0	1	0	0
urban	1	4	13	female	9					1	1	0	1	0	1	0	1	1	0	0	0	1	1	0	1	0	0	1	1	0	1	0	0
urban	8	4	81	male	9					1	1	0	1	0	1	0	0	1	1	1		0	0	0	0	1	0	1	1	0	0	0	0
urban	2	4	22	female	9					0	0	0	0	0	0	0	0	1	0	0	0	0	0	0	0	0	0	1	0	1	0	0	0
rural	5	4	52	male	9					1	1	0	0	0	0	0	0	1	0	0	0		0	0	0	0	0	0	1	0	0	0	0
urban	8	4	81	female	9					0	0	0	0	0	1	0	0	1		1	0	0	0	0	0	0	0	0	1	0	0	0	0
urban	1	4	13	female	9					0	0	0	0	0	0	0	0	1	0	0	0	0	0	0	0	0	0	0	1	0	0	0	0
urban	1	4	13	female	9					0	0	0	0	0	0	0	0	1	0	1		0	0	0	0	0	0	1	1	0	0	0	0
urban	1	4	13	female	9					0	0	0	0	0	0	0	0	0	0	0	0	0	0	0	0	0	0	1	1	0	0	1	0
urban	2	5	25	female	9					1	1	0	0	1	1	0	0		1	1	0	1	1	1	1	0	0	0	1	1	0	1	0
urban	1	4	13	female	9					1	1	1	1	0	0	0	1	1	0	1	0	1	1	1	1	1	0	1	1	0	0	0	0
urban	1	4	13	female	9					1	0	0	1	0	1	0	0	1	1	0	0	0	0	0	0	0	0	0	0	1	0	0	0
urban	1	4	13	female	9					1	0	1	1	0	1	0	0	1	1	0	0	0	0	0	1	0	0	0	1	0	0	1	0
urban	1	5	16	female	9					1	0	1	1	0	1	0	1	1	0	0	0	0	0	0	1	0	0	1	1	0	0	0	0
rural	6	4	61	male	9					0	0	1	0	1	0	1	1	1	0	0	1	1	1	0	1	0	0	1	1	1	0	0	0
urban	1	4	12	female	9					0	0	1	0	0	0	0	0	1	0	0	0	0	0	0	0	0	0	1	1	1	0	0	0
urban	1	4	13	female	9					0	1	0	1	0	0	0	1	1	0	1	0	0	0	0	1	1	0	1	1	0	0	0	0
urban	3	4	31	male	9					0	0	0	1	0	0	0	0	1	0	1	0	0	0	0	0	0	0	0	1	1	0	0	0
urban	4	4	43	male	10					0	1	0	1	1	1	0	1	1	0	1	0	0	0	0	1	0	0	1	0	1	0	0	0
rural	5	4	52	female	10					0	0	1	1	0	0	0	0	1	0	0	1	1	1	0	0	1	0	1	0	0	0	0	0
rural	5	4	51	male	13					1	1	0	0	0	0	0	0	1	0	0	0	0	0	1	0	0	0	1	0	0	1	0	0
rural	5	4	51	male	13					1	0	0	0	0	0	0	0		0	0	1	0	0	0	0	0	0	0	1	0	0	0	0
rural	6	4	62	male	10					1	0	0	0	0	0	0	0	1	0	1	0	0	1	0	0	0	1	1	1	0	0	0	0
rural	5	4	51	male	10	126	26	16.3769	0	0	0	0	0	0	0	0	0	1	0	1	0	0	0	0	0	0	0	1	1	1	0	1	1	0	0	1	0	1	0	0	0	0	0	0	1	0	0	0	0
urban	1	4	12	male	9	127	20	12.4	0	1	1	0	1	0	1	0	0	1	0	0		0	0	0	1	1	0	0	1	1	0	1	1	0	1	1	0	1	1	0	1	0	1	1	1	0	0	1	0
urban	1	4	13	male	10	130	30	17.7515	0	1	1	1	1	0	1	0	0	1	0	0	0	0	1	0	1	0	0	1	1	0	1	1	1	0	0	1	1	1	1	0	0	0	0	0	1	0	1	0	0
rural	5	4	51	male	10	130	25	14.7929	0	1	0	0	0	0	0	0	0	0	0	0	1	0	0	0	0	0	0	1	1	0	1	1	1	0	1	1	0	1	1	1	0	0	1	1	1	0	0	0	0
rural	6	4	62	male	10	130	24	14.2012	0	1	1	0	0	0	0	0	0	1	1	0	0	1	1	0	0	0	0	1	1	0	1	1	1	0	1	1	0	1	1	0	0	0	1	1	1	0	0	0	1
urban	1	4	12	male	9	130	25	14.7929	0	1	1	0	1	0	1	0	1		0	0	0	1	0	0	1	0	0	1	1	0	0	1	1	0	1	1	0	0	1	0	0	0	1	1	1	0	0	0	0
urban	2	5	26	female	10	131	25	14.5679	0	0	0	0	1	0	0	0	0	1	0	1	0	1	0	0	1	0	0	0	1	0	1	1	1	0	0	1	0	0	0	0	0	0	1	1	1	0	0	0	0
urban	4	5	46	female	11	132	35	20.0872	0	0	1	0	1	0	1	0	0	1	0	0	0	0	1	0	1	0	0	1	1	0	1	1	1	0	0	1	0	1	0	0	0	0	0	0	0	0	0	0	0
urban	1	5	14	male	10	132	30	17.2176	0	1	0	0	1	1	1	0	0	1	0	1	0	1	0	0	1	0	0	0	1	0	0	1	1	0	0	1	0	0	0	1	0	1	0	0	0	0	0	0	0
urban	1	4	11	male	9	132	25	14.348	0	0	1	1	1	0	0	0	0	1	0	1	0	0	0	0	0	1	1	1	1	0	0	1	1	0	1	1	0	1	1	0	1	0	1	1	1	0	0	0	0
rural	6	5	63	female	10	133	28	15.829	0	0	1	0	1	0	1	0	0	1	0	0	0	0	1	0	1	0	0	1	0	0	1	1	1	0	0	1	0	0	1	0	0	0	0	0	1	0	0	0	0
urban	4	4	41	male	10	133	25.5	14.4157	0	0	1	0	1	0	1	0	0	1	0	1	0	0	1	0	1	0	0	0	0	1	0	1	1	0	1	1	0	1	1	0	1	1	1	1	1	0	0	0	0
urban	4	4	41	male	10	133	23	13.0024	0	1	0	0	0	0	0	0	1	1	0	1	0	1	0	0	1	1	0	0	1	1	0	1	1	0	1	1	0	1	1	1	1	0	1	1	1	0	1	0	0
urban	2	4	22	female	10	133	26	14.6984	0	0	1	0	0	0	0	0	0	1	0	1	0	0	0	0	0	0	0	1	1	0	0	1	1	0	0	1	0	1	1	0	0	0	0	1	1	0	1	0	0
urban	1	5	14	male	10	135	29.5	16.1866	0	1	1	1	0	0	0	0	0	1	1	0	0	0	0	0	1	0	0	0	0	1	0	1	1	0	0	1	1	1	1	1	1	0	0	1	0	0	0	0	0
urban	8	4	82	male	10	135	30	16.4609	0	0	1	0	1	0	0	0	0	1	0	0	1	0	0	0	0	0	1	0	1	0	0	1	1	0	0	1	0	1	0	0	0	0	0	1	1	0	0	0	0
urban	4	4	42	male	10	135	25	13.7174	0	0	0	0	0	0	1	0	1	1	1	1	0	0	0	0	0	0	0	0	0	1	0	1	1	0	1	1	0	1	1	1	0	1	1	1	1	0	1	0	0
urban	4	4	43	male	10	135	26	14.2661	0	1	1	0	0	1	1	1	0	1		0	0	1	0	0	0	0	0	1	1	0	0	1	1	0	0	1	0	1	1	0	0	0	0	0	1	0	0	0	0
urban	1	4	12	female	9	135	25	13.7174	0	1	1	0	1	1	1	0	0	1	1	1	0	1	0	0	0	1	0	1	1	1	1	1	1	0	1	1	0	1	1	0	0	0	1	1	1	0	0	1	0
rural	6	4	62	male	9	137	24.5	13.0534	0	1	0	0	1	0	0	0	1	1	0	1	0	0	0	0	1	0	1	1	1	0	1	1	1	0	1	1	0	1	1	0	1	0	1	1	1	0	0	0	0
urban	2	4	21	female	9	137	24.2	12.8936	0	1	0	0	1	0	1	0	0	1	0	1	0	1	0	0	1	1	0	1	1	0	1	1	1	0	0	1	0	0	1	0	0	0	1	0	1	0	0	0	0
urban	4	4	41	female	10	138	30	15.753	0	0	1	0	1	0	1	0	0	1	0	1	0	0	0	0	0	0	0	1	1	1	0	1	1	0	1	1	0	1	1	0	0	0	1	1	1	0	0	0	0
urban	1	4	13	male	10	138	25	13.1275	0	1	1	1	1	0	1	0	1	1	1	0	1	1	1	0	0	0	0	1	1	0	1	1	1	0	0	1	0	1	1	0	1	0	0	1	0	0	0	0	0
urban	4	4	41	female	10	138	26	13.6526	0	1	0	1	1	0	1	0	1	1	1	0	0	1	0	1	1	0	0	1	0	1	1	1	1	0	1	1	0	1	1	1	1	1	1	1	1	0	0	0	0
urban	4	4	43	female	9	138	25	13.1275	0	1	1	0	0	0	1	0	1	1	1	1	0	0	0	0	0	0	0	0	0	1	1	1	1	0	0	1	0	1	0	0	0	0	0	0	0	0	0	0	0
urban	3	4	32	male	9	138	29	15.2279	0	0	0	0	1	0	1	0	0	1	0	0		0	0	0	0	0	0	1	1	0	1	1	1	0	1	1	0	1	1	0	0	1	1	1	1	0	0	0	0
urban	8	5	84	male	11	139	34.5	17.8562	0	0	1	1	1	0	0	0	1	1	0	1	0	0	1	1	1	0	0	1	1	0	1	1	1	0	0	1	0	1	1	0	0	0	0	0	1	0	0	0	0
rural	5	5	54	male	11	140	27	13.7755	0	0	0	0	0	0	0	0	1	1	0	0	0	0	0	0	0	0	0	1	1	0	0	1	1	0	1	1	0	1	1	1	1	0	1	1	1	0	0	0	0
urban	1	5	16	male	11	140	43	21.9388	0	0	0	1	1	0	1	0	0	1	0	1	0	0	0	0	0	0	0	1	0	1	0	1	1	0	0	1	0	1	1	0	0	0	0	0	1	0	0	0	0
urban	3	5	33	male	11	140	36	18.3673	0	1	1	1		1	1	0	0	1	0	0	0	0	1	0	0	0	0	1	1	0	1	1	1	0	1	1	0	1	1	0	0	0	1	1	1	0	0	0	0
urban	1	4	12	female	10	140	34	17.3469	0	0	1	0	1	0	1	0	1	1	0	1	0	0	1	0	1	0	0	0	1	1	0	1	1	0	0	1	1	0	0	0	1	0	1	1	0	0	0	0	0
urban	1	4	12	male	10	140	36	18.3673	0	1	0	1	1	0	0	0	0	1	0	1	0	0	1	0	0	0	0	1	0	1	0	1	1	0	0	1	0	1	1	0	0	1	1	0	1	0	1	0	0
urban	1	4	12	male	10	140	36	18.3673	0	1	0	1	1	1	1	0	1	1	0	1	0	1	0	1	1	0	0	0	1	1	0	1	1	0	1	1	0	1	1	1	1	0	1	1	1	0	0	0	0
urban	4	4	41	male	10	140	21	10.7143	0	0	1	1	0	0	1	0	1	1	1	1	0	0	0	0	0	0	0	0	1	0	1	1	1	0	1	1	0	1	1	0	0	1	1	1	1	0	0	0	0
urban	4	4	44	male	10	140	25	12.7551	0	0	0	0	1	0	1	0	0	1	0	1	0	0	1	0	1	0	0	0	0	1	0	1	1	0	0	1	0	0	1	0	0	0	0	0	1	0	0	0	0
urban	1	4	13	female	10	140	28	14.2857	0	0	0	0	1	0	0	0	0	1	0	1	0	1	0	0	1	0	0	0	1	0	0	1	1	0	0	1	0	1	1	0	0	0	0	0	0	0	0	0	0
urban	1	4	13	female	10	140	25	12.7551	0	0	0	1	0	0	1	0	0	1	0	0		0	0	0	0	0	0	1	1	0	0	1	1	0	0	1	0	0	1	0	0	0	1	1	1	0	1	0	0
urban	2	4	23	male	10	140	30	15.3061	0	0	0	0	1	0	1	0	1	0	0	0	0	0	1	0	1	0	0	0	1	1	0	1	1	0	1	1	1	0	1	0	0	0	0	1	1	0	0	0	0
rural	5	4	52	male	10	140	25	12.7551	0	1	0	0	1	0	0	0	0	1	0	0	0	0	0	0	1	1	0	0	1	0	1	1	1	0	1	1	0	1	1	0	0	0	1	1	1	0	0	0	0
urban	1	4	11	female	10	140	30	15.3061	0	1	0	0	1	0	1	0	0	1	0	1	0	1	0	0	1	0	0	1	1	0	0	1	1	0	1	1	0	1	1	1	1	0	1	1	1	0	0	0	0
urban	2	4	22	female	10	140	25	12.7551	0	1	1	0	0	0	1	0	1	1	1	1	0	1	0	1	1	0	0	1	1	0	0	1	1	0	0	1	0	1	0	0	0	0	1	1	0	0	0	0	0
urban	1	4	12	female	9	140	25	12.7551	0	1	0	0	1	0	1	0	1	1	1	0	0	0	0	0	1	0	0	1	1	0	0	1	1	0	0	1	0	0	0	0	0	0	0	0	1	0	0	0	0
urban	4	4	44	female	9	140	34	17.3469	0	0	1	0	1	0	1	0	0	1	1	1	0	1	1	0	1	1	0	1	1	0	1	1	1	0	0	1	0	1	1	0	0	0	0	0	1	0	0	0	0
urban	2	4	23	female	9	140	29	14.7959	0	0	1	0	0	0	0	0	1	1	0	1	0	0	0	0	0	1	0	1	1	0	0	1	1	0	1	1	0	1	1	0	0	0	1	1	1	0	0	0	0
urban	1	5	14	male	11	141	40	20.1197	0	1	0	0	1	0	1	0	0	1	1	1	0	1	0	0	0	0	0	0	1	0	0	1	1	0	0	1	1	0	1	1	1	0	1	1	1	0	0	0	0
urban	4	5	46	female	10	141	25	12.5748	0	1	0	0	1	0	1	0	1	1	0	1	0	1	0	1	1	0	0	0	0	1	0	1	1	0	0	1	0	1	0	0	0	0	0	0	0	0	0	0	0
rural	6	5	63	male	10	141	30	15.0898	0	0	0	1	1	0	0	0	0	1	0	0	1	0	0	0	1	0	0	1	1	0	1	1	1	0	0	1	0	1	1	0	0	0	0	0	1	0	1	0	1
urban	4	4	41	male	9	141	28	14.0838	0	1	1	0	0	0	1	0	0	0	0	0	0	0	0	0	0	0	0	0	0	1	1	1	1	0	1	1	0	1	1	0	0	1	1	1	1	0	0	0	0
urban	4	4	44	female	9	141	36	18.1077	0	1	1	0	0	0	0	0	1	1	0	0	0	1	1	1	1	1	0	1	1	0	1	1	1	0	0	1	0	0	1	1	0	0	0	0	0	0	0	0	1
urban	2	5	24	male	11	142	32	15.8699	0	0	1	0	1	0	1	0	0	1	0	1	0	0	1	1	1	1	0	1	1	1	1	1	1	0	0	1	0	1	1	0	0	1	1	0	1	0	0	0	1
urban	1	5	16	female	11	142	32.5	16.1178	0	1	1	1	1	0	1	0	0	1	0	0	0	0	1	0	1	0	0	1	1	0	0	1	1	0	0	1	0	1	1	0	0	0	0	1	1	0	0	0	0
urban	8	4	81	male	10	142	30	14.878	0	0	0	0	1	0	0	0	0	1	0	1	0	0	0	0	0	0	0	1	1	0	0	1	1	0	0	1	0	1	1	0	0	0	0	0	1	0	0	0	0
rural	5	5	54	male	10	142	32	15.8699	0	0	0	0	0	0	1	0	1	1	1	1	0	1	0	0	0	0	0	1	1	0	0	1	1	0	1	1	0	1	1	0	1	1	1	1	1	0	1	0	0
urban	2	4	23	female	10	142	38	18.8455	0	1	1	1	1	0	0	0	0	1	0	1	0	0	0	0	0	0	0	0	1	0	0	1	1	0	0	1	0	1	1	0	1	0	0	1	1	1	0	0	0
urban	2	5	24	male	11	142	38	18.8455	0	1	0	1	1	0	1	0	0	1	0	0	0	0	0	0	1	1	0	0	1	0	0	1	1	0	1	1	0	1	1	0	1	0	1	1	1	0	1	0	1
urban	1	5	15	female	10	143	37	18.0938	0	0	1	1	1	0	1	0	1	1	1	1	0	1	0	1	1	0	0	1	1	0	0	1	1	0	1	1	0	1	1	0	0	0	1	1	1	0	0	0	0
rural	6	4	62	female	10	143	30	14.6706	0	1	0	0	0	0	0	0	0	1	1	0	0	0	0	0	0	0	0	1	1	1	1	1	1	0	1	1	0	1	1	1	0	1	1	1	1	0	0	0	1
rural	5	5	54	female	10	143	29	14.1816	0	0	1	0	1	0	0	0	0	1	0	0	0	0	1	0	1	0	0	0	1	0	0	1	1	0	1	1	0	1	1	0	0	0	1	1	1	0	1	0	0
urban	1	4	13	male	10	143	31	15.1597	0	1	1	1	1	0	1	0	0	1	0	0	0	0	0	0	1	0	0	0	0	1	0	1	1	0	0	1	0	0	1	0	1	0	1	1	1	0	1	0	0
urban	2	4	21	male	9	143	25	12.2255	0	1	0	0	1	0	1	0	0	1	1	1	0	0	0	0	0	0	0	0	0	1	0	1	1	0	0	1	0	0	1	0	0	0	1	0	0	0	0	0	0
urban	8	5	84	male	10	144	35	16.8789	0	0	1	0	1	0	1	0	0	1	1	1	0	0	0	0	1	1	0	0	1	1	0	1	1	0	0	1	0	1	0	0	0	0	0	0	0	0	0	0	0
urban	4	5	47	female	11	145	29	13.7931	0	0	1	0	0	0	1	0	1	1	0	0	0	0	1	0	1	1	1	1	1	1	1	1	1	0	0	1	0	1	1	0	0	0	0	1	1	0	0	0	0
urban	1	5	14	male	11	145	36	17.1225	0	0	0	0	1	1	1	1	0	1	0	0	0	1	1	0	1	1	0	1	1	0	0	1	1	0	0	1	0	1	1	0	0	0	0	0	1	0	1	0	0
urban	4	5	46	female	11	145	45	21.4031	0	1	0	0	0	0	1	0	0	1	0	1	0	0	0	1	1	0	0	0	0	1	0	1	1	0	0	1	0	0	0	0	0	0	0	0	1	0	0	0	0
urban	1	5	16	male	11	145	41	19.5006	0	0	0	1	0	0	1	0	0	1	1	1	0	0	0	0	0	0	0	0	1	0	0	1	1	0	0	1	0	1	0	0	0	0	1	0	0	0	0	0	0
urban	1	5	14	male	10	145	32	15.22	0	1	0	0	0	0	1	0	0	1	0	0	0	0	0	0	0	0	0	0	1	1	0	1	1	0	0	1	0	1	1	0	0	0	0	0	1	0	1	0	0
urban	1	5	15	female	10	145	31	14.7444	0	1	0	0	1	0	0	0	0	1	1	0	0	0	1	1	1	0	0	1	1	0	0	1	1	0	0	1	0	1	1	0	1	0	1	1	1	0	0	0	0
urban	1	5	14	male	10	145	41.5	19.7384	0	1	0	0	1	0	1	0	0	1	1	1	0	0	1	0	1	1	0	1	1	1	1	1	1	0	0	1	1	1	1	0	1	0	0	1	1	0	0	0	0
urban	4	5	45	male	10	145	32	15.22	0	1	1	0	1	0	1	0	0	1	0	1	0	1	1	0	0	1	0	1	1	0	0	1	1	0	0	1	0	1	0	0	0	0	1	1	0	0	0	0	0
urban	1	5	14	male	10	145	36	17.1225	0	0	1	1	1	0	0	0	0	1	0	1	0	0	1	1	0	0	0	1	1	0	0	1	1	0	0	1	0	1	1	1	1	0	1	1	1	0	0	0	0
urban	4	5	46	male	10	145	36	17.1225	0	1	0	1	1	0	1	0	0	1	0	1	0	1	1	0	0	0	0	1	1	0	0	1	1	0	0	1	0	1	0	0	0	0	1	0	1	0	1	0	0
urban	1	5	15	male	10	145	34	16.1712	0	1	1	0	1	0	1	0	0	1	0	1	0	0	1	0	1	0	0	1	1	0	1	1	1	0	0	1	0	1	0	0	0	0	1	0	0	0	0	0	0
rural	5	4	52	male	10	145	32	15.22	0	0	1	0	0	0	0	0	0	1	0			0	0	0	0	0	0	1	1	0	1	1	1	0	1	1	0	1	1	0	0	0	1	1	1	0	0	0	1
urban	3	4	32	male	10	145	32	15.22	0	0	1	0	0	0	1	0	0	1	1	1	1	0	1	0	0	0	0	1	1	0	0	1	1	0	1	1	0	1	1	0	0	0	1	1	1	0	1	0	0
urban	4	4	43	male	10	145	32	15.22	0	0	1	0	1	0	1	0	0	1	0	1	1	0	1	0	1	0	0	0	0	1	0	1	1	0	0	1	0	1	1	0	0	0	0	0	1	0	0	0	0
urban	2	4	23	male	10	145	30	14.2687	0	0	0	0	0	0	0	0	0	1	0	0	0	0	0	0	1	1	0	0	1	1	0	1	1	0	0	1	1	1	1	1	1	0	0	1	1	0	0	0	0
urban	4	4	44	female	10	145	33	15.6956	0	0	0	0	0	0	1	0	0	1	0	0	0	0	0	0	0	0	0	1	0	1	0	1	1	0	0	1	0	1	1	0	0	0	0	0	1	0	1	0	0
urban	2	4	21	female	9	145	33	15.6956	0	0	0	0	0	0	1	0	0	1	1	1	0	0	0	0	0	0	1	0	0	1	0	1	1	0	0	1	0	0	0	0	0	0	0	0	1	0	0	0	0
urban	7	5	72	male	11	146	34	15.9505	0	1	1	0	1	0	1	0	0	1	0	0	0	0	0	0	1	0	0	0	0	1	0	1	1	0	1	1	0	1	1	0	1	0	1	1	1	0	0	0	1
urban	1	5	16	female	11	146	30	14.0739	0	0	1	1	0	0	0	0	0	1	1	1	0	0	0	0	1	0	1	1	0	1	1	1	1	0	0	1	1	1	1	1	0	1	0	0	1	0	0	0	0
urban	7	5	71	male	11	146	38	17.827	0	1	0	0	1	0	1	0	0	1	0	1	0	1	1	1	1	1	0	0	1	0	0	1	1	0	1	1	0	0	0	0	0	0	0	0	1	0	0	0	0
urban	2	4	23	female	10	146	28	13.1357	0	1	1	1	1	0	1	0	0	1	0	0	0	0	0	0	0	0	0	1	1	1	0	1	1	0	0	1	1	1	1	1	1	1	0	1	1	0	0	0	0
urban	7	5	71	female	11	146.5	33	15.3758	0	0	1	0	1	0	0	0	0	1	0	1	0	0	1	0	0	0	0	1	1	0	1	1	1	0	1	1	0	1	1	0	0	0	1	1	1	0	0	0	0
rural	5	4	51	male	11	147	30	13.8831	0	0	0	0	0	0	0	0	0	1	0	1	0	0	0	0	0	0	0	0	1	0	0	1	1	0	1	1	0	1	1	0	0	0	1	1	1	0	0	0	0
urban	2	5	26	male	10	147	33	15.2714	0	0	1	0	0	0	0	0	0	1	0	1	0	0	0	0	0	0	0	0	1	0	0	1	1	0	0	1	0	1	1	0	0	0	0	0	0	0	0	0	0
urban	4	5	45	female	10	147	33	15.2714	0	1	0	1	1	0	1	0	0	1	0	1	0	0	0	0	0	0	0	1	1	0	0	1	1	0	0	0	0	1	0	0	0	0	0	0	0	0	1	0	0
urban	1	5	15	female	11	148	30	13.6961	0	1	0	1	1	0	1	0	0	1	0	1	0	1	1	0	0	0	0	1	1	0	0	1	1	0	0	1	1	1	1	1	1	1	0	0	1	0	1	0	0
urban	8	4	82	female	9	148	42	19.1746	0	1	1	0	1	0	1	0	0	1	1	1	0	0	1	0	1	0	0	0	1	1	0	1	1	0	1	1	0	1	1	0	0	0	1	1	1	0	0	0	0
urban	4	5	45	male	11	149	38	17.1163	0	1	0	1	1	0	1	0	0	1	1	1	0	0	0	0	1	0	0	0	1	0	0	1	1	0	1	1	0	1	1	0	1	1	1	1	1	0	0	0	0
urban	3	5	34	female	11	149	31.5	14.1885	0	0	1	0	1	0	1	0	0	1	0	0	0	0	1	0	1	0	0	0	1	0	1	1	1	0	1	1	1	1	1	0	1	1	0	1	1	0	0	0	0
urban	4	5	48	female	11	149	35	15.7651	0	0	0	0	0	0	1	0	0	1	1	1	0	0	0	0	1	0	0	0	1	0	0	1	1	0	0	1	0	1	1	0	0	0	1	1	1	0	0	0	0
urban	3	4	31	female	10	149	37	16.6659	0	1	1	0	1	0	1	0	0	1	1	1	0	1	1	0	1	0	0	0	1	0	0	1	1	0	1	1	0	1	1	0	1	0	1	1	1	0	0	0	0
urban	4	4	43	male	9	149	41	18.4676	0	0	1	0	0	0	0	0	1	1	0	0	0	0	0	0	0	0	0	0	1	0	0	1	1	0	0	1	0	0	1	0	0	0	0	0	1	0	0	0	0
urban	1	5	15	male	10	149.1	37	16.6436	0	1	0	1	1	0	1	0	0	1	0	0	1	1	0	0	0	1	0	0	1	0	0	1	1	0	0	1	0	1	1	0	0	0	0	0	1	0	1	0	0
urban	1	5	14	male	11	149.9	36	16.0214	0	1	1	0	1	0	1	0	0	1	0	1	0	1	0	0	1	0	0	0	0	1	0	1	1	0	0	1	0	1	1	0	1	0	0	1	1	0	0	0	0
urban	8	5	83	female	12	150	37.5	16.6667	0	0	0	0	1	0	0	0	0	1	1	0	1	0	0	0	1	1	0	1	1	0	1	1	1	0	0	1	0	0	1	0	0	0	1	0	1	0	0	0	0
urban	7	5	71	male	11	150	40	17.7778	0	1	0	0	1	0	1	0	0	1	0	0	0	1	0	0	1	0	0	0	1	0	0	1	1	0	1	1	0	1	1	0	0	0	1	1	1	0	0	0	0
urban	1	5	15	male	11	150	36	16	0	0	0	0	1	0	0	0	0	1	1	1	0	0	0	0	1	0	0	0	0	1	0	1	1	0	0	1	0	1	1	0	0	0	0	0	1	0	1	0	0
urban	1	5	16	male	11	150	40	17.7778	0	1	0	0	0	0	1	0	0	1	1	1	0	0	0	0	0	0	0	0	1	1	1	1	1	0	1	1	0	1	1	0	0	0	1	1	1	0	0	0	0
urban	4	5	46	male	11	150	28	12.4444	0	0	0	1	1	0	0	0	0	1		1	0	0	0	1	0	0	1	0	0	1	1	1	1	0	0	1	0	1	1	1	0	0	1	0	0	0	0	0	1
urban	8	5	83	female	11	150	30	13.3333	0	1	1	0	0	1	1	0	0	1	1	1	1	1	0	0	0	1	0	1	1	0	0	1	1	0	1	1	0	1	1	0	0	1	1	1	1	0	0	0	0
urban	1	4	13	male	10	150	32.5	14.4444	0	0	1	1	1	0	0	0	1	1	0	0	1	0	0	1	1	0	0	1	0	1	1	1	1	0	0	1	0	1	1	0	0	0	1	1	0	0	0	0	1
urban	8	4	82	female	10	150	41	18.2222	0	1	1	0	1	0	1	0	0		1	1	0	1	1	1	1	1	0	0	1	1	1	1	1	0	0	1	0	1	1	0	0	0	0	0	0	0	0	0	0
urban	1	4	12	female	10	150	30	13.3333	0	0	0	0	0	0	0	0	1	1	0	1	0	0	0	0	1	0	0	0	1	0	0	1	1	0	1	1	0	1	1	0	1	1	1	0	1	0	0	0	1
urban	7	5	74	female	10	150	45	20	0	0	0	1	0	0	0	0	0	1	0	0	0	0	0	1	0	0	0	1	1	0	0	1	1	0	1	1	0	1	1	0	1	0	1	1	1	0	0	0	0
urban	2	4	23	male	10	150	35	15.5556	0	1	0	0	1	0	1	0	1	1	0	0	0	1	1	0	1	0	1	0			0	1	1	0	1	1	1	1	1	1	0	0	1	1	1	0	1	0	0
urban	2	4	22	male	10	150	40	17.7778	0	0	0	0	0	0	0	0	0	1	0	1	0	0	0	0	0	0	0	0	1	0	0	1	1	0	1	1	0	1	1	0	0	0	1	1	1	0	0	0	1
rural	5	4	51	male	10	150	30	13.3333	0	1	0	0	0	0	0	0	1	1	0	1	1	0	0	0	0	0	0	1	1	0	0	1	1	0	1	1	0	1	1	0	0	0	1	1	1	0	0	0	0
urban	1	5	16	male	11	151	40	17.5431	0	0	1	0	1	0	0	0	0	1	1	1	0	0	1	0	0	0	0	1	1	0	0	1	1	0	1	1	0	1	1	0	0	0	1	1	1	0	1	0	0
urban	8	5	83	female	11	151	40	17.5431	0	0	0	1	0	0	1	0	0	1	0	0	0	0	0	0	0	0	0	0	0	1	0	1	1	0	1	1	0	1	1	0	0	1	1	1	1	0	0	0	0
urban	4	5	48	male	11	152	46	19.91	0	0	1	0	0	0	0	0	0	1	1	0	0	0	0	0	0	0	0	0	0	1	0	1	1	0	1	1	0	1	1	0	0	0	1	1	1	0	0	0	0
urban	1	5	14	male	11	152	50	21.6413	0	0	0	1	1	0	1	0	0	1	0	0	0	0	0	1	1	0	0	0	0	1	0	1	1	0	0	1	0	1	1	0	0	0	0	0	1	0	1	0	0
urban	8	5	83	male	10	152	45	19.4771	0	0	1	1	1	0	1	0	0	1	1	1	0	0	0	0	0	1	0	0	1	0	0	1	1	0	0	1	1	1	1	1	0	0	1	0	1	0	0	0	0
urban	4	5	47	male	10	152	35	15.1489	0	1	0	1	0	0	1	1	0	1	1	1	1	0	0	0	1	1	0	0	0	1	1	1	1	0	0	1	0	1	1	0	0	0	0	0	1	0	0	0	0
urban	2	4	21	female	9	152	32	13.8504	0	0	0	0	0	0	0	0	1	1	0	1	0	0	0	0	0	0	0	0	1	0	0	1	1	0	1	1	0	1	1	0	0	0	1	1	1	0	0	0	0
urban	7	5	71	female	11	152.5	41	17.6297	0	0	1	0	1	0	1	0	0	1	0	1	0	1	1	0	1	0	0	1	1	0	0	1	1	0	1	1	0	1	1	0	0	1	1	1	1	0	0	0	0
urban	1	5	16	female	11	153	33.5	14.3107	0	1	0	0	1	0	1	0	0	1	1	1	0	0	0	0	1	0	0	1	0	1	0	1	1	0	1	1	0	1	1	1	0	0	1	0	1	0	1	0	0
urban	1	5	16	male	11	153	38	16.2331	0	0	0	0	1	0	1	0	1	1	0	0	0	0	0	0	1	0	0	0	1	0	1	1	1	0	1	1	0	1	1	0	0	0	1	1	1	0	0	0	0
urban	1	5	14	male	11	153	40	17.0874	0	1	1	0	1	0	0	0	0	0	1	1	0	1	1	0	1	0	0	0	0	1	0	1	1	0	0	1	0	1	1	0	0	0	0	0	0	0	0	0	0
urban	8	5	84	female	11	153	38	16.2331	0	1	1	0	1	0	1	0	1	1	0	1	0	1	1	0	1	0	0	1	0	1	1	1	1	0	0	1	0	1	1	0	0	0	1	0	1	0	0	0	0
urban	4	5	48	male	11	154	40	16.8663	0	1	1	0	1	0	1	1	0	1	0	0	0	0	1	0	1	0	0	1	1	0	0	1	1	0	0	1	0	1	1	0	0	0	0	0	0	0	0	0	0
urban	4	5	45	male	11	154	48	20.2395	0	0	1	0	0	0	0	0	0	1	0	1	0	0	0	0	0	0	0	0	0	1	0	1	1	0	0	1	0	0	1	0	0	0	0	0	1	0	1	0	0
urban	8	5	83	male	11	155	47	19.563	0	0	1	1	1	0	1	0	0	1	1	1	0	0	1	1	1	0	0	0	1	0	0	1	1	0	1	1	0	1	1	0	0	0	1	1	1	0	0	1	0
rural	5	5	54	female	11	155	49	20.3954	0	0	0	0	0	0	0	0	0	1	0	0	0	0	0	0	0	0	0	1	1	0	0	1	1	0	0	1	0	1	1	0	0	0	1	1	1	0	0	0	0
urban	2	5	24	male	11	155	36.3	15.1093	0	1	0	0	1	0	1	0	0	1	1	1	0	1	1	0	0	0	0	1	1	1	0	1	1	0	1	1	0	1	1	0	1	0	1	1	1	0	1	0	0
rural	5	5	53	male	11	155	35	14.5682	0	1	0	1	0	0	0	0	1	1	0	0	1	0	0	1	0	0	0	1	1	0	0	1	1	0	1	1	0	1	1	0	0	0	1	1	1	0	0	0	1
urban	1	5	15	male	10	155	36	14.9844	0	0	1	0	1	0	0	0	0	1	1	1	0	0	1	0	1	0	0	1	0	1	1	1	1	0	0	1	0	1	1	0	0	0	1	1	1	0	0	0	0
urban	1	5	15	male	10	155	44	18.3143	0	0	0	1	0	0	0	0	0	1	0	1	0	0	0	0	0	0	0	1	1	0	0	1	1	0	0	1	0	1	1	0	0	0	0	0	1	0	0	0	0
urban	1	4	12	male	10	155	46	19.1467	0	0	0	0	1	0	0	0	0	1	1	1	0	0	0	0	1	0	0	1	0	1	0	1	1	0	1	1	0	1	1	0	0	0	1	1	1	0	1	1	1
urban	1	5	15	male	11	156	52	21.3675	0	1	0	1	1	0	1	0	0	1	1	0	0	0	0	0	0	0	0	0			0	1	1	0	0	1	1	1	1	0	1	1	0	1	1	0	0	0	0
urban	4	5	46	male	11	156	40	16.4366	0	1	1	0	1	0	0	0	1	1	0	0	0	0	0	0	0	0	0	0	1	0	0	1	1	0	0	1	0	1	1	1	0	0	0	0	0	0	0	0	1
urban	1	4	13	male	10	156	47	19.313	0	1	1	1	1	0	1	0	1	1	0	0	0	0	0	0	1	1	0	0	0	1	0	1	1	0	0	1	0	1	1	0	0	0	1	1	1	0	1	0	0
urban	4	5	48	female	11	157	45	18.2563	0	1	1	1	1	0	1	0	0	1	0	1	0	1	1	0	1	0	0	0	0	1	0	1	1	0	0	1	0	1	1	0	0	0	1	0	1	0	0	0	0
urban	8	5	83	male	11	157	33	13.388	0	1	0	1	1	0	1	0	0	1	0	0	0	0	1	1	1	0	0	0	1	0	0	1	1	0	1	1	0	1	1	0	0	1	1	1	1	0	0	0	0
urban	3	5	33	male	11	157	52	21.0962	0	0	1	0	0	0	1	0	0	1	1		0	0	0	0	1	1	0	0	1	0	0	1	1	0	1	1	0	1	1	0	0	1	1	1	1	0	0	0	0
urban	1	5	16	male	11	158	47	18.8271	0	1	1	0	1	0	0	0	1	1	1	1	0	1	1	0	1	0	0	1	1	0	0	1	1	0	1	1	0	1	1	0	0	0	0	0	1	0	0	0	0
urban	4	5	48	female	11	159	40	15.8222	0	1	1	1	1	0	0	0	0	1	0	1	0	1	1	0	0	1	0	0	0	1	0	1	1	0	0	1	0	1	1	0	0	0	0	0	1	0	0	0	0
urban	4	5	45	male	11	160	37.5	14.6484	0	0	1	1	1	0	1	1	0	1	0	0	0	1	0	0	0	0	0	0	0	1	1	1	1	0	0	1	1	1	1	1	0	0	0	0	1	0	0	0	0
urban	1	5	15	female	10	160	41	16.0156	0	0	0	0	0	0	0	0	0	1	0	1	0	1	0	1	0	0	0	1	1	0	0	1	1	0	0	1	0	1	1	0	0	0	1	1	1	0	0	0	0
urban	3	5	33	female	12	162	40	15.2416	0	0	1	0	0	0	1	0	1	1	0	1	0	0	1	0	1	1	0	1	1	1	0	1	1	0	1	1	0	1	1	0	0	0	1	1	1	0	0	0	0
urban	1	5	16	female	11	162	50	19.052	0	0	1	1	1	0	0	0	1	1	1	0	0	1	1	1	1	0	0	1	1	0	0	1	1	0	1	1	0	1	1	0	0	0	0	1	1	0	0	0	0
urban	4	5	48	female	11	162	49	18.6709	0	1	0	0	0	0	0	0	0	1	0	0	0	1	1	0	1	0	0	0	1	0	0	1	1	0	0	1	0	1	1	0	0	0	0	0	1	0	1	0	0
urban	4	4	41	male	11	164	55	20.4491	0	1	1	0	0	0	1	0	1	1	0	1	0	0	0	0	0	0	0	0	0	1	0	1	1	0	1	1	0	1	1	0	1	0	1	1	1	0	0	0	0
urban	4	5	47	male	11	165	50	18.3655	0	1	0	0	0	0	1	0	0	1	1	1	0	0	0	0	0	0	1	0	1	0	0	1	1	0	1	1	0	1	1	1	0	0	1	1	1	0	0	0	0
urban	1	5	14	male	11	165	49	17.9982	0	0	0	0	1	0	0	0	1	1	0	0	0	0	0	0	0	0	0	1	0	1	0	1	1	0	1	1	0	1	1	0	1	0	0	1	1	0	0	0	0
urban	1	4	12	female	11	120	37.5	26.0417	1	0	0	1	0	0	0	0	0	1	1	1	0	0	1	1	0	0	0	0	1	0	0	1	1	0	1	1	1	1	1	0	0	0	1	1	1	0	0	1	0
urban	1	4	12	female	9	126	41	25.8251	1	1	1	1	1	0	0	0	0	1	0	1	0	0	1	0	1	0	0	0	0	1	0	1	1	0	0	1	0	1	0	0	0	0	1	0	0	0	1	0	0
urban	4	5	46	male	11	130	51	30.1775	1	1	1	0	1	0	1	0	0	1	0	0	1	0	1	0	1	0	0	1	0	1	0	1	1	0	0	1	0	1	0	0	0	0	0	0	0	0	0	0	0
urban	4	5	46	male	11	130	40	23.6686	1	0	0	0	0	0	0	0	1	1	0	1	0	0	0	0	0	0	0	1	1	0	1	1	1	0	0	1	0	0	1	0	0	0	0	1	1	0	1	0	0
urban	1	4	12	male	10	130	40	23.6686	1	0	0	0	0	0	0	0	0	1	0	0		0	0	0	0	1	0	1	0	1	0	1	1	0	1	1	0	1	1	1	1	0	1	1	1	0	1	0	0
urban	2	4	23	female	10	130	40	23.6686	1	1	0	1	1	0	1	0	0	1	1	1	0	1	0	0	0	0	0	0	1	0	1	1	1	0	0	1	1	0	1	1	1	0	0	1	1	0	1	0	0
urban	4	5	47	female	10	132	50	28.6961	1	1	1	0	1	0	1	0	1	1	0	0	0	1	0	1	0	0	0	0	0	1	0	1	1	0	1	1	0	1	1	0	0	0	1	1	1	0	1	0	0
urban	2	5	25	male	11	133	51	28.8315	1	1	1	1	1	1	1	0	1	1	1	0	0	1	1	0	1	0	0	1	1	0	0	1	1	0	1	1	0	1	1	0	1	0	1	1	1	0	0	0	0
rural	6	4	62	male	10	134	42	23.3905	1	1	1	0	0	0	0	0	1	1	0	0	1	0	0	0	0	0	0	1	1	1	1	1	1	0	0	1	0	1	1	1	0	0	0	0	0	0	0	1	0
urban	1	4	12	male	9	136	50	27.0329	1	0	0	1	0	0	0	0	0	1	0	0	0	0	0	0	0	0	0	0	1	0	0	1	1	0	0	1	1	1	1	1	0	0	1	0	1	0	0	0	0
urban	2	4	22	male	9	136	44	23.7889	1	1	0	0	0	0	1	0	1	1	0	0	0	1	1	0	0	0	0	0	1	0	0	1	1	0	0	1	1	1	1	1	0	0	0	0	1	0	0	0	0
urban	2	4	22	male	9	138	48	25.2048	1	1	0	0	0	0	1	0	1	1	0	0	0	1	0	0	0	0	0	1	1	0	0	1	1	0	0	1	0	1	1	0	0	0	0	1	1	0	0	0	0
urban	2	4	21	female	9	138	52	27.3052	1	1	1	0	1	1	1	0	0	1	0	0	0	0	0	0	0	1	0	1	1	0	0	1	1	0	1	1	0	1	1	0	0	0	0	0	1	0	0	0	0
urban	1	5	16	male	11	140	60	30.6122	1	0	1	1	1	0	1	0	1	1	0	0	0	0	1	0	1	0	1	1	0	1	1	1	1	0	0	1	1	0	1	1	0	0	0	0	1	0	0	0	0
urban	3	5	33	male	11	140	50	25.5102	1	1	0	0	1	0	1	0	0	1	0	1	0	0	0	0	0	1	0	1	1	1	0	1	1	0	1	1	0	1	1	0	0	1	1	1	1	0	0	0	0
urban	4	4	44	male	9	143	50	24.4511	1	1	1	1	1	0	1	0	0	1	1	1	0	0	1	0	0	0	0	0	0	1	0	1	1	0	0	1	0	0	1	0	0	0	0	0	1	0	1	0	1
rural	5	5	54	male	11	146	55	25.8022	1	1	1	0	1	0	0	0	0	1	1	1	0	0	0	0	1	0	0	1	1	0	0	1	1	0	1	1	0	1	1	0	0	0	1	1	1	0	1	0	0
rural	6	4	62	female	10	149	50	22.5215	1	1	0	0	1	0	1	0	0	1	0	1	0	0	0	0	1	0	0	1	1	0	0	1	1	0	1	1	0	1	1	0	0	0	1	1	1	0	0	0	0
urban	2	5	24	female	11	150	64	28.4444	1	1	0	0	1	0	1	0	0	1	0	1	0	0	1	0	0	0	0	0	1	1	0	1	1	0	0	1	0	1	1	0	0	0	1	1	0	0	1	0	0
urban	4	4	43	male	10	150	53	23.5556	1	0	0	0	0	0	0	0	0	1	0	0	0	0	0	0	0	0	0	0	1	0	0	1	1	0	0	1	1	1	1	0	0	0	0	0	1	0	0	0	0
urban	2	4	22	male	10	154	63	26.5643	1	1	1	0	1	0	1	0	0	1	1	1	0	0	1	0	1	0	0	1	0	1	0	1	1	0	0	0	0	1	1	0	0	0	0	0	1	0	0	0	0
urban	1	5	14	male	12	156	66	27.1203	1	0	0	0	0	0	1	0	1	1	0	0	0	1	0	0	0	0	0	1	1	0	0	1	1	0	0	1	1	0	1	1	0	0	0	0	1	0	1	0	0
rural	6	4	62	male	10	130				1	0	1	1	0	1	0	0	1	0	0	1	0	0	0	1	1	1	1	1	0	0	1	1	0	1	1	0	1	1	0	0	1	1	1	1	0	0	0	0
urban	8	4	81	female	11	132				0	1	0	1	0	1	0	0	1	1	1	0	1	1	0	1	1	0	0	1	0	0	1	1	0	0	1	0	1	1	0	0	1	1	0	0	0	0	0	0
urban	1	4	13	female	10	132				0	0	0	0	0	0	0	0	1	1	0	0	1	0	0	0	0	0	1	0	1	0	1	1	0	0	1	0	1	1	0	0	0	1	1	0	0	1	0	0
urban	2	4	21	female	9	136				0	0	0	0	0	0	0	0	1	0	1	0	0	0	0	0	0	0	0	0	1	0	1	1	0	0	1	0	1	1	0	0	0	1	1	1	0	0	0	0
urban	1	5	16	male	11	138				1	0	1	1	0	0	0	0	1	0	0	0	0	1	0	1	0	0	0	0	1	0	1	1	0	0	1	0	1	1	0	1	0	1	0	1	0	0	0	0
urban	4	5	47	male	9	138				1	0	1	1	0	1	0	0	1	0	1	0	0	0	0	0	0	0	0	0	0	1	1	1	0	0	1	0	1	1	0	0	1	0	0	1	0	0	0	0
urban	4	4	43	female	10	140				0	1	0	1	1	1	1	0	0	0	1	0	1	0	0	0	0	0	1	0	1	0	1	1	0	0	1	1	1	1	1	0	0	0	0	1	0	0	0	0
urban	2	5	25	female	10	142				1	0	0	0	0	1	0	0	1	0	1	0	1	0	0	0	0	0	0	1	0	0	1	1	0	1	1	0	1	1	0	1	0	1	1	1	0	1	0	0
rural	6	5	64	female	11	150				0	1	0	1	0	0	0	0	1	0	1	0	1	1	1	1	0	0	1	1	0	0	1	1	0	0	1	0	1	1	0	0	0	1	0	0	0	0	0	0
urban	1	4	13	male	10	150				1	1	1	1	1	1	0	0	1	0	0	0	1	1	0	1	0	0	1	1	1	0	1	1	0	0	1	0	1	1	0	0	0	1	1	0	0	1	0	0
urban	4	5	46	female	11	152.5					0	0	1	0	1	0	0	1	1	1	0	0	1	0	1	0	0	1	1	0	1	1	1	0	0	1	0	1	1	0	0	0	0	0	1	0	1	0	0
urban	1	5	15	female	10	153				1	1	0	0	0	1	0	0	1	0	1	0	1	1	0	1	0	0	1	0	1	0	1	1	0	0	1	0	0	0	1	0	0	0	0	0	0	1	0	0
urban	1	5	16	male	11	155				1	0	0	0	0	1	0	0	1	0	0	0	0	0	0	0	0	0	0	1	0	0	1	1	0	1	1	0	1	1	1	1	0	1	1	1	0	0	0	0
urban	2	5	24	male	11	165				1	0	0	0	0	1	0	0	1	0	0	0	1	0	0	1	0	0	0	1	0	0	1	1	0	0	1	0	0	1	0	0	0	0	1	1	0	1	0	1
urban	3	5	33	male	11					0	0	1	0	0	0	0	0	1	0	0								0	1	0	1	1	1	0	1	1	1	1	1	0	1	0	1	1	1	0	0	0	0
urban	1	5	15	female	11					1	1	1	1	0	1	0	0	1	0	1		1	1	0	0	0	0	1	0	1	0	1	1	0	0	1	1	1	1	1	1	0	1	1	1	0	1	0	0
urban	8	5	84	male	11					1	0	0	1	1	1	0	0	1	1	0	0	1	1	0	1	0	0	0	1	0	0	1	1	0	0	1	0	1	0	0	0	0	0	0	0	0	0	0	0
urban	1	5	15	male	11					1	0	0	1	0	1	0	0	1	0	0	0	1	0	0	0	0	0	1	1	0	0	1	1	0	1	1	0	1	1	0	0	0	1	1	1	0	1	0	0
urban	4	5	47	male	10		28.5			0	1	0	1	0	1	0	0	1	0	1	0	0	1	1	0	0	0	0	0	1	0	1	1	0	0	1	0	1	0	0	0	0	0	0	0	0	0	0	1
urban	4	5	47	male	10		40			0	1	1	0	0	1	0	1		1	1	0	0	1	0	1	0	0	1	1	0	0	1	1	0	0	1	1	1	1	0	1	0	0	1	1	0	1	0	0
urban	2	5	25	male	10		32			0	0	0	0	0	0	0	0	1	1	1	0	0	0	0	0	0	0	1	1	1	0	1	1	0	1	1	0	1	1	0	0	0	1	1	1	0	0	0	0
urban	4	4	43	male	10					1	0	0	0	0	0	0	0	1	1	1	0	0	1	0	1	0	0	0			0	1	1	0	0	1	0	1	1	0	0	0	1	0	1	0	0	0	1
urban	1	4	13	male	10					1	0	0	1	0	1	0	1	1	0	0	0	1	0	0	1	0	0	0	1	0	0	1	1	0	0	1	0	1	1	0	0	0	0	1	1	0	1	0	1
urban	1	4	13	female	9					0	0	0	1	0	0	0	0	1	1	1		0	0	0	0	0	0	1	1	0	0	1	1	0	0	1	0	1	1	0	0	0	0	0	1	0	1	0	1
urban	4	4	43	male	9					0	0	0	0	0	0	0	0	1	0	1		0	0	0	0	0	0	0	1	1	0	1	1	0	0	1	0	1	1	1	0	0	1	0	0	0	0	0	0
urban	4	4	42	male	9					1	1	1	1	0	1	0	0	1	0	0	0	1	1	1	1	1	0	1	1	0	0	1	1	0	0	1	0	1	1	0	0	0	0	0	1	0	0	0	1
urban	1	4	13	female	9		24.5			0	1	0	1	0	0	0	0	1	0	0	0	1	1	0	1	1	0	0	1	1	0	1	1	0	0	1	0	1	1	0	0	0	1	0	1	0	1	0	0
urban	2	4	21	female	9					1	1	0	0	0	1	0	0	0	1	0	0	1	1	0	1	0	0	1	1	0	1	1	1	0	1	1	0	1	1	0	0	0	1	1	1	1	0	0	0
[truncated: 7 more columns]

## Sheet: Data_Environment
school	room	region	grade	place	location	sa	mssa	fox	lzd	p	cn	tec	e	sxt	c	mxf	rd	te	da	pvl	eta	tst	etb	mdr	st	cc
3	32	urban	4	toilet	toilet flush handle	0	0
1	14	urban	5	toilet	toilet flush handle	0	0
4	41	urban	4	toilet	toilet flush handle	0	0
2	21	urban	4	toilet	toilet flush handle	0	0
8	83	urban	5	toilet	toilet flush handle	0	0
1	12	urban	4	toilet	toilet flush handle	0	0
4	41	urban	4	toilet	toilet flush handle	0	0
3	31	urban	4	toilet	toilet flush handle	0	0
3	31	urban	4	toilet	toilet flush handle	0	0
2	25	urban	5	toilet	toilet flush handle	0	0
4	44	urban	4	toilet	toilet flush handle	0	0
4	43	urban	4	toilet	toilet flush handle	0	0
1	15	urban	5	toilet	toilet flush handle	0	0
2	23	urban	4	toilet	toilet flush handle	0	0
8	82	urban	4	toilet	toilet flush handle	0	0
8	83	urban	5	toilet	toilet flush handle	0	0
4	48	urban	5	toilet	toilet flush handle	0	0
3	34	urban	5	toilet	toilet flush handle	0	0
2	26	urban	5	toilet	toilet flush handle	0	0
4	42	urban	4	toilet	toilet flush handle	0	0
7	74	urban	5	toilet	toilet flush handle	0	0
1	12	urban	4	toilet	toilet flush handle	0	0
4	45	urban	5	toilet	toilet flush handle	0	0
4	44	urban	4	toilet	toilet flush handle	0	0
8	81	urban	4	toilet	toilet flush handle	0	0
2	23	urban	4	toilet	toilet flush handle	0	0
4	43	urban	4	toilet	toilet flush handle	0	0
2	22	urban	4	toilet	toilet flush handle	0	0
1	15	urban	5	toilet	toilet flush handle	0	0
1	13	urban	4	toilet	toilet flush handle	0	0
7	71	urban	5	toilet	toilet flush handle	0	0
1	16	urban	5	toilet	toilet flush handle	1	0
4	46	urban	5	toilet	toilet flush handle	0	0
1	13	urban	4	toilet	toilet flush handle	0	0
3	33	urban	5	toilet	toilet flush handle	0	0
4	47	urban	5	toilet	toilet flush handle	0	0
3	34	urban	5	toilet	toilet flush handle	0	0
8	81	urban	4	toilet	toilet flush handle	0	0
4	46	urban	5	toilet	toilet flush handle	0	0
4	42	urban	4	toilet	toilet flush handle	0	0
7	73	urban	5	toilet	toilet flush handle	0	0
2	26	urban	5	toilet	toilet flush handle	0	0
4	48	urban	5	toilet	toilet flush handle	0	0
2	25	urban	5	toilet	toilet flush handle	0	0
8	84	urban	5	toilet	toilet flush handle	0	0
8	84	urban	5	toilet	toilet flush handle	0	0
7	72	urban	5	toilet	toilet flush handle	0	0
2	24	urban	5	toilet	toilet flush handle	0	0
1	14	urban	5	toilet	toilet flush handle	0	0
8	82	urban	4	toilet	toilet flush handle	0	0
7	73	urban	5	toilet	toilet flush handle	0	0
3	33	urban	5	toilet	toilet flush handle	0	0
1	11	urban	4	toilet	toilet flush handle	0	0
2	24	urban	5	toilet	toilet flush handle	0	0
1	16	urban	5	toilet	toilet flush handle	0	0
4	45	urban	5	toilet	toilet flush handle	0	0
3	32	urban	4	toilet	toilet flush handle	0	0
4	47	urban	5	toilet	toilet flush handle	0	0
1	11	urban	4	toilet	toilet flush handle	0	0
7	72	urban	5	toilet	toilet flush handle	0	0
2	22	urban	4	toilet	toilet flush handle	0	0
2	21	urban	4	toilet	toilet flush handle	0	0
1	16	urban	5	toilet	toilet floor	0	0
3	34	urban	5	toilet	toilet floor	0	0
7	71	urban	5	toilet	toilet floor	0	0
8	81	urban	4	toilet	toilet floor	0	0
7	72	urban	5	toilet	toilet floor	0	0
2	26	urban	5	toilet	toilet floor	0	0
2	22	urban	4	toilet	toilet floor	0	0
1	13	urban	4	toilet	toilet floor	0	0
4	48	urban	5	toilet	toilet floor	0	0
7	74	urban	5	toilet	toilet floor	0	0
2	25	urban	5	toilet	toilet floor	0	0
2	21	urban	4	toilet	toilet floor	0	0
8	82	urban	4	toilet	toilet floor	0	0
4	46	urban	5	toilet	toilet floor	0	0
4	41	urban	4	toilet	toilet floor	0	0
1	14	urban	5	toilet	toilet floor	0	0
2	23	urban	4	toilet	toilet floor	0	0
3	32	urban	4	toilet	toilet floor	0	0
4	47	urban	5	toilet	toilet floor	0	0
7	73	urban	5	toilet	toilet floor	0	0
3	33	urban	5	toilet	toilet floor	0	0
8	84	urban	5	toilet	toilet floor	0	0
1	11	urban	4	toilet	toilet floor	0	0
4	42	urban	4	toilet	toilet floor	0	0
1	15	urban	5	toilet	toilet floor	0	0
3	31	urban	4	toilet	toilet floor	0	0
8	83	urban	5	toilet	toilet floor	0	0
4	41	urban	4	toilet	toilet light switch	0	0
1	12	urban	4	toilet	toilet light switch	0	0
1	13	urban	4	toilet	toilet light switch	0	0
8	82	urban	4	toilet	toilet light switch	0	0
3	31	urban	4	toilet	toilet light switch	0	0
1	14	urban	5	toilet	toilet light switch	0	0
4	44	urban	4	toilet	toilet light switch	0	0
8	83	urban	5	toilet	toilet light switch	0	0
7	72	urban	5	toilet	toilet light switch	0	0
1	13	urban	4	toilet	toilet light switch	0	0
2	24	urban	5	toilet	toilet light switch	0	0
8	81	urban	4	toilet	toilet light switch	0	0
2	24	urban	5	toilet	toilet light switch	0	0
4	47	urban	5	toilet	toilet light switch	0	0
1	16	urban	5	toilet	toilet light switch	0	0
4	45	urban	5	toilet	toilet light switch	0	0
2	26	urban	5	toilet	toilet light switch	0	0
3	31	urban	4	toilet	toilet light switch	0	0
7	71	urban	5	toilet	toilet light switch	0	0
4	44	urban	4	toilet	toilet light switch	0	0
3	33	urban	5	toilet	toilet light switch	0	0
2	25	urban	5	toilet	toilet light switch	0	0
2	22	urban	4	toilet	toilet light switch	0	0
1	15	urban	5	toilet	toilet light switch	0	0
1	16	urban	5	toilet	toilet light switch	0	0
3	32	urban	4	toilet	toilet light switch	0	0
4	41	urban	4	toilet	toilet light switch	0	0
1	12	urban	4	toilet	toilet light switch	0	0
7	74	urban	5	toilet	toilet light switch	0	0
4	45	urban	5	toilet	toilet light switch	0	0
4	47	urban	5	toilet	toilet light switch	0	0
1	11	urban	4	toilet	toilet light switch	0	0
8	83	urban	5	toilet	toilet light switch	0	0
3	34	urban	5	toilet	toilet light switch	0	0
4	42	urban	4	toilet	toilet light switch	0	0
4	46	urban	5	toilet	toilet light switch	0	0
2	25	urban	5	toilet	toilet light switch	0	0
4	48	urban	5	toilet	toilet light switch	0	0
8	84	urban	5	toilet	toilet light switch	0	0
1	15	urban	5	toilet	toilet light switch	0	0
7	71	urban	5	toilet	toilet light switch	0	0
7	73	urban	5	toilet	toilet light switch	0	0
2	22	urban	4	toilet	toilet light switch	0	0
7	74	urban	5	toilet	toilet light switch	0	0
4	48	urban	5	toilet	toilet light switch	0	0
4	43	urban	4	toilet	toilet light switch	0	0
4	42	urban	4	toilet	toilet light switch	0	0
3	33	urban	5	toilet	toilet light switch	0	0
8	84	urban	5	toilet	toilet light switch	0	0
3	32	urban	4	toilet	toilet light switch	0	0
4	43	urban	4	toilet	toilet light switch	0	0
4	46	urban	5	toilet	toilet light switch	0	0
3	34	urban	5	toilet	toilet light switch	0	0
1	14	urban	5	toilet	toilet light switch	0	0
2	26	urban	5	toilet	toilet light switch	0	0
2	23	urban	4	toilet	toilet light switch	0	0
1	11	urban	4	toilet	toilet light switch	0	0
2	23	urban	4	toilet	toilet light switch	0	0
7	73	urban	5	toilet	toilet light switch	0	0
2	21	urban	4	toilet	toilet light switch	0	0
8	81	urban	4	toilet	toilet light switch	0	0
7	72	urban	5	toilet	toilet light switch	0	0
2	21	urban	4	toilet	toilet light switch	0	0
8	82	urban	4	toilet	toilet light switch	0	0
3	32	urban	4	toilet	toilet door handle	0	0
8	81	urban	4	toilet	toilet door handle	0	0
3	33	urban	5	toilet	toilet door handle	0	0
4	42	urban	4	toilet	toilet door handle	0	0
7	72	urban	5	toilet	toilet door handle	0	0
4	41	urban	4	toilet	toilet door handle	0	0
2	23	urban	4	toilet	toilet door handle	0	0
2	25	urban	5	toilet	toilet door handle	0	0
2	22	urban	4	toilet	toilet door handle	0	0
4	43	urban	4	toilet	toilet door handle	0	0
2	24	urban	5	toilet	toilet door handle	0	0
8	82	urban	4	toilet	toilet door handle	0	0
1	13	urban	4	toilet	toilet door handle	0	0
4	44	urban	4	toilet	toilet door handle	0	0
4	48	urban	5	toilet	toilet door handle	0	0
1	14	urban	5	toilet	toilet door handle	0	0
2	26	urban	5	toilet	toilet door handle	0	0
2	21	urban	4	toilet	toilet door handle	1	0
7	74	urban	5	toilet	toilet door handle	0	0
1	16	urban	5	toilet	toilet door handle	0	0
4	47	urban	5	toilet	toilet door handle	0	0
3	34	urban	5	toilet	toilet door handle	0	0
1	12	urban	4	toilet	toilet door handle	0	0
4	46	urban	5	toilet	toilet door handle	0	0
7	73	urban	5	toilet	toilet door handle	0	0
8	83	urban	5	toilet	toilet door handle	0	0
7	71	urban	5	toilet	toilet door handle	0	0
3	31	urban	4	toilet	toilet door handle	0	0
1	11	urban	4	toilet	toilet door handle	0	0
4	45	urban	5	toilet	toilet door handle	0	0
8	84	urban	5	toilet	toilet door handle	0	0
1	15	urban	5	toilet	toilet door handle	0	0
7	73	urban	5	toilet	toilet faucet	0	0
4	45	urban	5	toilet	toilet faucet	0	0
1	16	urban	5	toilet	toilet faucet	0	0
4	43	urban	4	toilet	toilet faucet	0	0
7	71	urban	5	toilet	toilet faucet	0	0
3	31	urban	4	toilet	toilet faucet	0	0
4	47	urban	5	toilet	toilet faucet	0	0
2	23	urban	4	toilet	toilet faucet	0	0
1	12	urban	4	toilet	toilet faucet	0	0
1	15	urban	5	toilet	toilet faucet	0	0
4	42	urban	4	toilet	toilet faucet	0	0
7	74	urban	5	toilet	toilet faucet	0	0
4	48	urban	5	toilet	toilet faucet	0	0
1	14	urban	5	toilet	toilet faucet	0	0
1	11	urban	4	toilet	toilet faucet	0	0
3	34	urban	5	toilet	toilet faucet	0	0
4	43	urban	4	toilet	toilet faucet	0	0
8	81	urban	4	toilet	toilet faucet	0	0
3	33	urban	5	toilet	toilet faucet	0	0
7	71	urban	5	toilet	toilet faucet	0	0
2	21	urban	4	toilet	toilet faucet	0	0
4	42	urban	4	toilet	toilet faucet	0	0
2	25	urban	5	toilet	toilet faucet	0	0
3	33	urban	5	toilet	toilet faucet	0	0
4	46	urban	5	toilet	toilet faucet	0	0
8	82	urban	4	toilet	toilet faucet	0	0
2	22	urban	4	toilet	toilet faucet	0	0
8	84	urban	5	toilet	toilet faucet	0	0
3	32	urban	4	toilet	toilet faucet	0	0
2	25	urban	5	toilet	toilet faucet	0	0
3	32	urban	4	toilet	toilet faucet	0	0
2	26	urban	5	toilet	toilet faucet	1	0
1	16	urban	5	toilet	toilet faucet	1	0
8	83	urban	5	toilet	toilet faucet	0	0
4	47	urban	5	toilet	toilet faucet	0	0
7	73	urban	5	toilet	toilet faucet	0	0
1	12	urban	4	toilet	toilet faucet	0	0
3	34	urban	5	toilet	toilet faucet	0	0
4	48	urban	5	toilet	toilet faucet	0	0
4	41	urban	4	toilet	toilet faucet	0	0
2	22	urban	4	toilet	toilet faucet	0	0
2	24	urban	5	toilet	toilet faucet	0	0
3	31	urban	4	toilet	toilet faucet	0	0
2	23	urban	4	toilet	toilet faucet	0	0
7	72	urban	5	toilet	toilet faucet	0	0
7	72	urban	5	toilet	toilet faucet	0	0
4	46	urban	5	toilet	toilet faucet	0	0
4	45	urban	5	toilet	toilet faucet	0	0
8	84	urban	5	toilet	toilet faucet	0	0
1	13	urban	4	toilet	toilet faucet	0	0
8	82	urban	4	toilet	toilet faucet	0	0
1	15	urban	5	toilet	toilet faucet	1	0
2	24	urban	5	toilet	toilet faucet	0	0
7	74	urban	5	toilet	toilet faucet	0	0
8	83	urban	5	toilet	toilet faucet	0	0
4	41	urban	4	toilet	toilet faucet	1	0
4	44	urban	4	toilet	toilet faucet	0	0
8	81	urban	4	toilet	toilet faucet	0	0
4	44	urban	4	toilet	toilet faucet	0	0
2	21	urban	4	toilet	toilet faucet	0	0
2	26	urban	5	toilet	toilet faucet	0	0
2	24	urban	5	public place	handle of stairs	0	0
1	14	urban	5	public place	handle of stairs	0	0
2	25	urban	5	public place	handle of stairs	0	0
1	14	urban	5	public place	handle of stairs	0	0
1	13	urban	4	public place	handle of stairs	0	0
2	21	urban	4	public place	handle of stairs	1	0
3	31	urban	4	public place	handle of stairs	0	0
7	74	urban	5	public place	handle of stairs	0	0
1	11	urban	4	public place	handle of stairs	0	0
8	84	urban	5	public place	handle of stairs	0	0
7	74	urban	5	public place	handle of stairs	0	0
2	26	urban	5	public place	handle of stairs	0	0
3	32	urban	4	public place	handle of stairs	0	0
1	12	urban	4	public place	handle of stairs	0	0
4	44	urban	4	public place	handle of stairs	0	0
4	44	urban	4	public place	handle of stairs	0	0
3	34	urban	5	public place	handle of stairs	0	0
2	26	urban	5	public place	handle of stairs	0	0
4	45	urban	5	public place	handle of stairs	0	0
8	83	urban	5	public place	handle of stairs	0	0
4	41	urban	4	public place	handle of stairs	0	0
2	23	urban	4	public place	handle of stairs	0	0
4	46	urban	5	public place	handle of stairs	1	0
4	43	urban	4	public place	handle of stairs	0	0
4	48	urban	5	public place	handle of stairs	0	0
4	42	urban	4	public place	handle of stairs	0	0
4	43	urban	4	public place	handle of stairs	0	0
3	33	urban	5	public place	handle of stairs	0	0
3	34	urban	5	public place	handle of stairs	0	0
3	31	urban	4	public place	handle of stairs	0	0
1	15	urban	5	public place	handle of stairs	0	0
2	22	urban	4	public place	handle of stairs	0	0
8	82	urban	4	public place	handle of stairs	0	0
8	83	urban	5	public place	handle of stairs	0	0
8	84	urban	5	public place	handle of stairs	0	0
3	32	urban	4	public place	handle of stairs	0	0
7	72	urban	5	public place	handle of stairs	0	0
7	71	urban	5	public place	handle of stairs	0	0
4	48	urban	5	public place	handle of stairs	0	0
2	25	urban	5	public place	handle of stairs	0	0
3	33	urban	5	public place	handle of stairs	0	0
2	22	urban	4	public place	handle of stairs	0	0
4	47	urban	5	public place	handle of stairs	0	0
1	15	urban	5	public place	handle of stairs	0	0
1	16	urban	5	public place	handle of stairs	0	0
2	21	urban	4	public place	handle of stairs	0	0
1	12	urban	4	public place	handle of stairs	0	0
1	16	urban	5	public place	handle of stairs	0	0
7	73	urban	5	public place	handle of stairs	0	0
7	71	urban	5	public place	handle of stairs	0	0
7	72	urban	5	public place	handle of stairs	0	0
1	11	urban	4	public place	handle of stairs	0	0
8	82	urban	4	public place	handle of stairs	0	0
4	46	urban	5	public place	handle of stairs	0	0
4	41	urban	4	public place	handle of stairs	0	0
4	45	urban	5	public place	handle of stairs	0	0
7	73	urban	5	public place	handle of stairs	0	0
2	22	urban	4	public place	floor of stairs	0	0
4	47	urban	5	public place	floor of stairs	1	0
1	13	urban	4	public place	floor of stairs	0	0
7	73	urban	5	public place	floor of stairs	0	0
4	45	urban	5	public place	floor of stairs	0	0
4	41	urban	4	public place	floor of stairs	0	0
4	48	urban	5	public place	floor of stairs	0	0
7	71	urban	5	public place	floor of stairs	0	0
4	42	urban	4	public place	floor of stairs	0	0
2	25	urban	5	public place	floor of stairs	0	0
3	31	urban	4	public place	floor of stairs	0	0
1	14	urban	5	public place	floor of stairs	0	0
1	11	urban	4	public place	floor of stairs	0	0
8	81	urban	4	public place	floor of stairs	0	0
2	21	urban	4	public place	floor of stairs	0	0
8	82	urban	4	public place	floor of stairs	0	0
8	83	urban	5	public place	floor of stairs	0	0
1	12	urban	4	public place	floor of stairs	0	0
3	32	urban	4	public place	floor of stairs	0	0
7	72	urban	5	public place	floor of stairs	0	0
3	34	urban	5	public place	floor of stairs	0	0
2	26	urban	5	public place	floor of stairs	0	0
2	24	urban	5	public place	floor of stairs	0	0
4	44	urban	4	public place	floor of stairs	0	0
1	15	urban	5	public place	floor of stairs	0	0
2	23	urban	4	public place	floor of stairs	0	0
4	43	urban	4	public place	floor of stairs	0	0
1	16	urban	5	public place	floor of stairs	0	0
7	74	urban	5	public place	floor of stairs	0	0
3	33	urban	5	public place	floor of stairs	0	0
8	82	urban	4	public place	floor of corridor	0	0
3	34	urban	5	public place	floor of corridor	0	0
2	24	urban	5	public place	floor of corridor	0	0
3	33	urban	5	public place	floor of corridor	0	0
8	81	urban	4	public place	floor of corridor	0	0
1	16	urban	5	public place	floor of corridor	0	0
3	32	urban	4	public place	floor of corridor	0	0
4	41	urban	4	public place	floor of corridor	0	0
1	11	urban	4	public place	floor of corridor	0	0
7	74	urban	5	public place	floor of corridor	0	0
4	47	urban	5	public place	floor of corridor	1	0
4	46	urban	5	public place	floor of corridor	0	0
4	45	urban	5	public place	floor of corridor	0	0
2	26	urban	5	public place	floor of corridor	0	0
8	84	urban	5	public place	floor of corridor	0	0
2	23	urban	4	public place	floor of corridor	0	0
4	42	urban	4	public place	floor of corridor	0	0
4	44	urban	4	public place	floor of corridor	0	0
2	22	urban	4	public place	floor of corridor	0	0
7	72	urban	5	public place	floor of corridor	0	0
8	83	urban	5	public place	floor of corridor	0	0
2	25	urban	5	public place	floor of corridor	0	0
1	15	urban	5	public place	floor of corridor	1	0
4	43	urban	4	public place	floor of corridor	0	0
1	13	urban	4	public place	floor of corridor	0	0
3	31	urban	4	public place	floor of corridor	0	0
7	73	urban	5	public place	floor of corridor	0	0
1	12	urban	4	public place	floor of corridor	0	0
4	48	urban	5	public place	floor of corridor	0	0
7	71	urban	5	public place	floor of corridor	0	0
8	81	urban	4	classroom	classroom floor	0	0
3	32	urban	4	classroom	classroom floor	0	0
4	41	urban	4	classroom	classroom floor	0	0
7	71	urban	5	classroom	classroom floor	0	0
4	46	urban	5	classroom	classroom floor	0	0
3	33	urban	5	classroom	classroom floor	0	0
7	73	urban	5	classroom	classroom floor	0	0
1	15	urban	5	classroom	classroom floor	1	0
4	47	urban	5	classroom	classroom floor	0	0
1	11	urban	4	classroom	classroom floor	0	0
2	24	urban	5	classroom	classroom floor	0	0
2	21	urban	4	classroom	classroom floor	0	0
8	83	urban	5	classroom	classroom floor	0	0
4	45	urban	5	classroom	classroom floor	0	0
1	16	urban	5	classroom	classroom floor	1	0
2	26	urban	5	classroom	classroom floor	0	0
1	12	urban	4	classroom	classroom floor	1	0
4	44	urban	4	classroom	classroom floor	0	0
7	72	urban	5	classroom	classroom floor	0	0
2	23	urban	4	classroom	classroom floor	0	0
8	84	urban	5	classroom	classroom floor	0	0
4	42	urban	4	classroom	classroom floor	0	0
1	13	urban	4	classroom	classroom floor	0	0
3	34	urban	5	classroom	classroom floor	0	0
8	82	urban	4	classroom	classroom floor	0	0
3	31	urban	4	classroom	classroom floor	0	0
2	25	urban	5	classroom	classroom floor	0	0
4	43	urban	4	classroom	classroom floor	0	0
3	33	urban	5	classroom	classroom light switch	0	0
4	43	urban	4	classroom	classroom light switch	1	0
4	45	urban	5	classroom	classroom light switch	0	0
3	34	urban	5	classroom	classroom light switch	0	0
4	41	urban	4	classroom	classroom light switch	0	0
7	73	urban	5	classroom	classroom light switch	0	0
1	15	urban	5	classroom	classroom light switch	0	0
8	81	urban	4	classroom	classroom light switch	0	0
8	84	urban	5	classroom	classroom light switch	0	0
4	47	urban	5	classroom	classroom light switch	0	0
8	83	urban	5	classroom	classroom light switch	0	0
1	16	urban	5	classroom	classroom light switch	1	0
8	82	urban	4	classroom	classroom light switch	0	0
1	13	urban	4	classroom	classroom light switch	0	0
4	41	urban	4	classroom	classroom light switch	0	0
4	42	urban	4	classroom	classroom light switch	0	0
2	23	urban	4	classroom	classroom light switch	0	0
7	74	urban	5	classroom	classroom light switch	0	0
1	16	urban	5	classroom	classroom light switch	1	0
1	11	urban	4	classroom	classroom light switch	1	0
2	21	urban	4	classroom	classroom light switch	0	0
2	25	urban	5	classroom	classroom light switch	0	0
4	46	urban	5	classroom	classroom light switch	0	0
1	14	urban	5	classroom	classroom light switch	0	0
4	47	urban	5	classroom	classroom light switch	0	0
2	25	urban	5	classroom	classroom light switch	0	0
8	82	urban	4	classroom	classroom light switch	0	0
3	32	urban	4	classroom	classroom light switch	0	0
1	11	urban	4	classroom	classroom light switch	0	0
2	22	urban	4	classroom	classroom light switch	0	0
4	48	urban	5	classroom	classroom light switch	0	0
1	12	urban	4	classroom	classroom light switch	1	0
3	34	urban	5	classroom	classroom light switch	0	0
8	83	urban	5	classroom	classroom light switch	0	0
4	44	urban	4	classroom	classroom light switch	0	0
3	31	urban	4	classroom	classroom light switch	0	0
4	46	urban	5	classroom	classroom light switch	0	0
2	22	urban	4	classroom	classroom light switch	0	0
1	14	urban	5	classroom	classroom light switch	0	0
2	26	urban	5	classroom	classroom light switch	0	0
1	15	urban	5	classroom	classroom light switch	0	0
8	81	urban	4	classroom	classroom light switch	0	0
7	71	urban	5	classroom	classroom light switch	0	0
4	43	urban	4	classroom	classroom light switch	0	0
7	71	urban	5	classroom	classroom light switch	0	0
4	45	urban	5	classroom	classroom light switch	0	0
1	13	urban	4	classroom	classroom light switch	0	0
2	23	urban	4	classroom	classroom light switch	0	0
2	26	urban	5	classroom	classroom light switch	0	0
1	12	urban	4	classroom	classroom light switch	0	0
7	72	urban	5	classroom	classroom light switch	0	0
4	44	urban	4	classroom	classroom light switch	0	0
4	42	urban	4	classroom	classroom light switch	0	0
7	73	urban	5	classroom	classroom light switch	0	0
2	21	urban	4	classroom	classroom light switch	1	0
3	33	urban	5	classroom	classroom light switch	0	0
7	72	urban	5	classroom	classroom light switch	0	0
3	31	urban	4	classroom	classroom light switch	0	0
2	24	urban	5	classroom	classroom light switch	0	0
8	84	urban	5	classroom	classroom light switch	0	0
2	24	urban	5	classroom	classroom light switch	0	0
3	32	urban	4	classroom	classroom light switch	0	0
2	26	urban	5	classroom	classroom air	0	0
3	34	urban	5	classroom	classroom air	0	0
8	84	urban	5	classroom	classroom air	0	0
7	72	urban	5	classroom	classroom air	0	0
8	84	urban	5	classroom	classroom air	0	0
4	42	urban	4	classroom	classroom air	0	0
3	32	urban	4	classroom	classroom air	0	0
1	16	urban	5	classroom	classroom air	0	0
2	26	urban	5	classroom	classroom air	0	0
7	71	urban	5	classroom	classroom air	0	0
7	71	urban	5	classroom	classroom air	0	0
7	73	urban	5	classroom	classroom air	0	0
7	71	urban	5	classroom	classroom air	0	0
4	48	urban	5	classroom	classroom air	0	0
1	11	urban	4	classroom	classroom air	1	0
1	13	urban	4	classroom	classroom air	0	0
2	22	urban	4	classroom	classroom air	0	0
4	44	urban	4	classroom	classroom air	0	0
1	11	urban	4	classroom	classroom air	0	0
3	33	urban	5	classroom	classroom air	0	0
4	42	urban	4	classroom	classroom air	0	0
4	47	urban	5	classroom	classroom air	0	0
2	21	urban	4	classroom	classroom air	0	0
4	46	urban	5	classroom	classroom air	0	0
1	15	urban	5	classroom	classroom air	0	0
2	25	urban	5	classroom	classroom air	0	0
4	46	urban	5	classroom	classroom air	0	0
1	13	urban	4	classroom	classroom air	0	0
2	21	urban	4	classroom	classroom air	0	0
2	24	urban	5	classroom	classroom air	0	0
4	44	urban	4	classroom	classroom air	0	0
4	43	urban	4	classroom	classroom air	0	0
2	24	urban	5	classroom	classroom air	0	0
2	26	urban	5	classroom	classroom air	0	0
4	47	urban	5	classroom	classroom air	0	0
2	23	urban	4	classroom	classroom air	0	0
1	12	urban	4	classroom	classroom air	0	0
8	83	urban	5	classroom	classroom air	0	0
3	31	urban	4	classroom	classroom air	0	0
7	72	urban	5	classroom	classroom air	0	0
3	34	urban	5	classroom	classroom air	0	0
7	72	urban	5	classroom	classroom air	0	0
8	82	urban	4	classroom	classroom air	0	0
4	45	urban	5	classroom	classroom air	0	0
3	34	urban	5	classroom	classroom air	0	0
2	26	urban	5	classroom	classroom air	0	0
7	74	urban	5	classroom	classroom air	0	0
1	13	urban	4	classroom	classroom air	0	0
4	44	urban	4	classroom	classroom air	0	0
3	34	urban	5	classroom	classroom air	0	0
3	34	urban	5	classroom	classroom air	0	0
4	46	urban	5	classroom	classroom air	0	0
2	22	urban	4	classroom	classroom air	0	0
3	32	urban	4	classroom	classroom air	0	0
3	33	urban	5	classroom	classroom air	0	0
4	48	urban	5	classroom	classroom air	0	0
4	43	urban	4	classroom	classroom air	0	0
7	74	urban	5	classroom	classroom air	0	0
1	11	urban	4	classroom	classroom air	0	0
1	16	urban	5	classroom	classroom air	0	0
2	22	urban	4	classroom	classroom air	0	0
2	23	urban	4	classroom	classroom air	0	0
1	12	urban	4	classroom	classroom air	0	0
2	25	urban	5	classroom	classroom air	0	0
4	46	urban	5	classroom	classroom air	0	0
7	73	urban	5	classroom	classroom air	0	0
2	24	urban	5	classroom	classroom air	0	0
8	81	urban	4	classroom	classroom air	0	0
1	12	urban	4	classroom	classroom air	1	0
8	83	urban	5	classroom	classroom air	0	0
1	11	urban	4	classroom	classroom air	0	0
8	84	urban	5	classroom	classroom air	0	0
2	24	urban	5	classroom	classroom air	0	0
1	15	urban	5	classroom	classroom air	0	0
8	82	urban	4	classroom	classroom air	0	0
2	24	urban	5	classroom	classroom air	0	0
7	74	urban	5	classroom	classroom air	0	0
4	48	urban	5	classroom	classroom air	0	0
4	45	urban	5	classroom	classroom air	0	0
4	41	urban	4	classroom	classroom air	0	0
1	12	urban	4	classroom	classroom air	0	0
2	23	urban	4	classroom	classroom air	0	0
4	42	urban	4	classroom	classroom air	0	0
1	11	urban	4	classroom	classroom air	0	0
1	14	urban	5	classroom	classroom air	0	0
8	83	urban	5	classroom	classroom air	0	0
8	81	urban	4	classroom	classroom air	0	0
8	82	urban	4	classroom	classroom air	0	0
4	45	urban	5	classroom	classroom air	0	0
2	21	urban	4	classroom	classroom air	0	0
2	26	urban	5	classroom	classroom air	0	0
4	42	urban	4	classroom	classroom air	0	0
3	33	urban	5	classroom	classroom air	0	0
7	72	urban	5	classroom	classroom air	0	0
2	21	urban	4	classroom	classroom air	0	0
4	45	urban	5	classroom	classroom air	0	0
8	83	urban	5	classroom	classroom air	0	0
4	44	urban	4	classroom	classroom air	0	0
3	31	urban	4	classroom	classroom air	0	0
7	71	urban	5	classroom	classroom air	0	0
3	31	urban	4	classroom	classroom air	0	0
3	32	urban	4	classroom	classroom air	0	0
8	83	urban	5	classroom	classroom air	0	0
2	25	urban	5	classroom	classroom air	0	0
7	73	urban	5	classroom	classroom air	0	0
1	15	urban	5	classroom	classroom air	0	0
2	25	urban	5	classroom	classroom air	0	0
4	43	urban	4	classroom	classroom air	0	0
4	47	urban	5	classroom	classroom air	0	0
7	73	urban	5	classroom	classroom air	0	0
8	84	urban	5	classroom	classroom air	0	0
1	15	urban	5	classroom	classroom air	0	0
4	45	urban	5	classroom	classroom air	0	0
2	22	urban	4	classroom	classroom air	0	0
8	84	urban	5	classroom	classroom air	0	0
1	14	urban	5	classroom	classroom air	1	0
4	46	urban	5	classroom	classroom air	0	0
8	81	urban	4	classroom	classroom air	0	0
8	82	urban	4	classroom	classroom air	0	0
4	44	urban	4	classroom	classroom air	0	0
4	41	urban	4	classroom	classroom air	0	0
3	31	urban	4	classroom	classroom air	0	0
4	43	urban	4	classroom	classroom air	0	0
4	43	urban	4	classroom	classroom air	0	0
4	42	urban	4	classroom	classroom air	0	0
3	32	urban	4	classroom	classroom air	0	0
4	41	urban	4	classroom	classroom air	0	0
2	23	urban	4	classroom	classroom air	0	0
1	13	urban	4	classroom	classroom air	0	0
1	15	urban	5	classroom	classroom air	0	0
7	73	urban	5	classroom	classroom air	0	0
2	23	urban	4	classroom	classroom air	0	0
1	14	urban	5	classroom	classroom air	0	0
8	81	urban	4	classroom	classroom air	0	0
7	72	urban	5	classroom	classroom air	0	0
4	48	urban	5	classroom	classroom air	0	0
1	16	urban	5	classroom	classroom air	0	0
3	33	urban	5	classroom	classroom air	0	0
4	47	urban	5	classroom	classroom air	0	0
2	22	urban	4	classroom	classroom air	0	0
3	33	urban	5	classroom	classroom air	0	0
4	41	urban	4	classroom	classroom air	0	0
3	32	urban	4	classroom	classroom air	0	0
8	81	urban	4	classroom	classroom air	0	0
4	48	urban	5	classroom	classroom air	0	0
1	16	urban	5	classroom	classroom air	0	0
7	74	urban	5	classroom	classroom air	0	0
1	16	urban	5	classroom	classroom air	0	0
8	82	urban	4	classroom	classroom air	0	0
4	47	urban	5	classroom	classroom air	0	0
2	25	urban	5	classroom	classroom air	0	0
1	13	urban	4	classroom	classroom air	0	0
7	74	urban	5	classroom	classroom air	0	0
3	31	urban	4	classroom	classroom air	0	0
1	12	urban	4	classroom	classroom air	0	0
4	41	urban	4	classroom	classroom air	0	0
2	21	urban	4	classroom	classroom air	0	0
8	81	urban	4	classroom	classroom door handle	0	0
1	11	urban	4	classroom	classroom door handle	1	0
1	13	urban	4	classroom	classroom door handle	0	0
3	33	urban	5	classroom	classroom door handle	0	0
8	82	urban	4	classroom	classroom door handle	0	0
4	45	urban	5	classroom	classroom door handle	0	0
3	32	urban	4	classroom	classroom door handle	0	0
4	46	urban	5	classroom	classroom door handle	0	0
2	26	urban	5	classroom	classroom door handle	0	0
1	15	urban	5	classroom	classroom door handle	0	0
4	47	urban	5	classroom	classroom door handle	0	0
2	21	urban	4	classroom	classroom door handle	0	0
4	43	urban	4	classroom	classroom door handle	0	0
2	23	urban	4	classroom	classroom door handle	0	0
3	31	urban	4	classroom	classroom door handle	0	0
4	41	urban	4	classroom	classroom door handle	0	0
7	72	urban	5	classroom	classroom door handle	0	0
1	16	urban	5	classroom	classroom door handle	0	0
7	71	urban	5	classroom	classroom door handle	0	0
8	84	urban	5	classroom	classroom door handle	0	0
4	42	urban	4	classroom	classroom door handle	0	0
3	34	urban	5	classroom	classroom door handle	0	0
2	24	urban	5	classroom	classroom door handle	0	0
8	83	urban	5	classroom	classroom door handle	0	0
4	44	urban	4	classroom	classroom door handle	0	0
1	12	urban	4	classroom	classroom door handle	0	0
2	22	urban	4	classroom	classroom door handle	0	0
2	25	urban	5	classroom	classroom door handle	0	0
7	73	urban	5	classroom	classroom door handle	0	0
1	14	urban	5	classroom	classroom door handle	0	0
8	84	urban	5	classroom	classroom chair	0	0
4	46	urban	5	classroom	classroom chair	0	0
3	34	urban	5	classroom	classroom chair	0	0
3	33	urban	5	classroom	classroom chair	0	0
4	48	urban	5	classroom	classroom chair	0	0
4	47	urban	5	classroom	classroom chair	0	0
4	46	urban	5	classroom	classroom chair	0	0
1	11	urban	4	classroom	classroom chair	0	0
7	71	urban	5	classroom	classroom chair	0	0
4	45	urban	5	classroom	classroom chair	0	0
4	43	urban	4	classroom	classroom chair	0	0
2	23	urban	4	classroom	classroom chair	0	0
1	13	urban	4	classroom	classroom chair	0	0
8	83	urban	5	classroom	classroom chair	0	0
2	22	urban	4	classroom	classroom chair	0	0
1	13	urban	4	classroom	classroom chair	0	0
4	44	urban	4	classroom	classroom chair	0	0
8	83	urban	5	classroom	classroom chair	0	0
8	82	urban	4	classroom	classroom chair	0	0
1	11	urban	4	classroom	classroom chair	0	0
4	44	urban	4	classroom	classroom chair	0	0
7	72	urban	5	classroom	classroom chair	0	0
2	21	urban	4	classroom	classroom chair	1	0
8	83	urban	5	classroom	classroom chair	0	0
4	44	urban	4	classroom	classroom chair	0	0
1	15	urban	5	classroom	classroom chair	0	0
4	47	urban	5	classroom	classroom chair	0	0
2	21	urban	4	classroom	classroom chair	0	0
3	32	urban	4	classroom	classroom chair	0	0
4	46	urban	5	classroom	classroom chair	0	0
4	42	urban	4	classroom	classroom chair	0	0
4	42	urban	4	classroom	classroom chair	0	0
2	26	urban	5	classroom	classroom chair	0	0
2	25	urban	5	classroom	classroom chair	0	0
2	26	urban	5	classroom	classroom chair	0	0
7	74	urban	5	classroom	classroom chair	0	0
1	13	urban	4	classroom	classroom chair	0	0
2	25	urban	5	classroom	classroom chair	0	0
1	13	urban	4	classroom	classroom chair	0	0
3	31	urban	4	classroom	classroom chair	0	0
3	31	urban	4	classroom	classroom chair	0	0
8	84	urban	5	classroom	classroom chair	0	0
7	72	urban	5	classroom	classroom chair	0	0
3	31	urban	4	classroom	classroom chair	0	0
4	47	urban	5	classroom	classroom chair	0	0
4	41	urban	4	classroom	classroom chair	0	0
7	73	urban	5	classroom	classroom chair	0	0
3	33	urban	5	classroom	classroom chair	0	0
3	34	urban	5	classroom	classroom chair	0	0
3	32	urban	4	classroom	classroom chair	0	0
7	73	urban	5	classroom	classroom chair	0	0
4	43	urban	4	classroom	classroom chair	0	0
2	26	urban	5	classroom	classroom chair	0	0
1	15	urban	5	classroom	classroom chair	0	0
8	81	urban	4	classroom	classroom chair	0	0
2	24	urban	5	classroom	classroom chair	0	0
7	74	urban	5	classroom	classroom chair	0	0
7	72	urban	5	classroom	classroom chair	0	0
1	15	urban	5	classroom	classroom chair	0	0
3	33	urban	5	classroom	classroom chair	0	0
3	34	urban	5	classroom	classroom chair	0	0
8	81	urban	4	classroom	classroom chair	0	0
2	24	urban	5	classroom	classroom chair	0	0
4	48	urban	5	classroom	classroom chair	0	0
1	12	urban	4	classroom	classroom chair	0	0
4	41	urban	4	classroom	classroom chair	0	0
8	83	urban	5	classroom	classroom chair	0	0
2	21	urban	4	classroom	classroom chair	0	0
4	42	urban	4	classroom	classroom chair	0	0
1	16	urban	5	classroom	classroom chair	1	0
4	41	urban	4	classroom	classroom chair	0	0
1	12	urban	4	classroom	classroom chair	0	0
4	48	urban	5	classroom	classroom chair	0	0
8	82	urban	4	classroom	classroom chair	0	0
1	15	urban	5	classroom	classroom chair	0	0
1	14	urban	5	classroom	classroom chair	0	0
4	41	urban	4	classroom	classroom chair	0	0
4	45	urban	5	classroom	classroom chair	0	0
8	84	urban	5	classroom	classroom chair	0	0
1	12	urban	4	classroom	classroom chair	0	0
1	11	urban	4	classroom	classroom chair	0	0
7	71	urban	5	classroom	classroom chair	0	0
2	22	urban	4	classroom	classroom chair	0	0
2	21	urban	4	classroom	classroom chair	0	0
4	47	urban	5	classroom	classroom chair	0	0
4	45	urban	5	classroom	classroom chair	0	0
4	42	urban	4	classroom	classroom chair	0	0
4	42	urban	4	classroom	classroom chair	0	0
2	23	urban	4	classroom	classroom chair	0	0
3	32	urban	4	classroom	classroom chair	0	0
2	25	urban	5	classroom	classroom chair	0	0
8	82	urban	4	classroom	classroom chair	0	0
3	31	urban	4	classroom	classroom chair	0	0
2	24	urban	5	classroom	classroom chair	0	0
8	84	urban	5	classroom	classroom chair	0	0
8	82	urban	4	classroom	classroom chair	0	0
2	23	urban	4	classroom	classroom chair	0	0
3	32	urban	4	classroom	classroom chair	0	0
8	81	urban	4	classroom	classroom chair	0	0
7	73	urban	5	classroom	classroom chair	0	0
1	16	urban	5	classroom	classroom chair	0	0
3	31	urban	4	classroom	classroom chair	0	0
3	33	urban	5	classroom	classroom chair	0	0
4	47	urban	5	classroom	classroom chair	0	0
2	23	urban	4	classroom	classroom chair	0	0
4	48	urban	5	classroom	classroom chair	0	0
1	14	urban	5	classroom	classroom chair	0	0
3	34	urban	5	classroom	classroom chair	0	0
2	24	urban	5	classroom	classroom chair	0	0
1	16	urban	5	classroom	classroom chair	0	0
8	84	urban	5	classroom	classroom chair	0	0
7	74	urban	5	classroom	classroom chair	1	0
2	26	urban	5	classroom	classroom chair	0	0
1	15	urban	5	classroom	classroom chair	0	0
1	13	urban	4	classroom	classroom chair	0	0
4	44	urban	4	classroom	classroom chair	0	0
8	83	urban	5	classroom	classroom chair	0	0
2	25	urban	5	classroom	classroom chair	0	0
8	82	urban	4	classroom	classroom chair	0	0
7	72	urban	5	classroom	classroom chair	0	0
4	43	urban	4	classroom	classroom chair	1	0
8	81	urban	4	classroom	classroom chair	0	0
7	73	urban	5	classroom	classroom chair	0	0
2	26	urban	5	classroom	classroom chair	0	0
1	16	urban	5	classroom	classroom chair	1	0
2	22	urban	4	classroom	classroom chair	0	0
1	14	urban	5	classroom	classroom chair	0	0
4	48	urban	5	classroom	classroom chair	0	0
1	12	urban	4	classroom	classroom chair	0	0
2	25	urban	5	classroom	classroom chair	0	0
3	34	urban	5	classroom	classroom chair	0	0
1	11	urban	4	classroom	classroom chair	0	0
8	81	urban	4	classroom	classroom chair	0	0
1	11	urban	4	classroom	classroom chair	0	0
7	71	urban	5	classroom	classroom chair	0	0
4	43	urban	4	classroom	classroom chair	0	0
1	12	urban	4	classroom	classroom chair	0	0
3	32	urban	4	classroom	classroom chair	0	0
4	41	urban	4	classroom	classroom chair	0	0
1	16	urban	5	classroom	classroom chair	0	0
4	46	urban	5	classroom	classroom chair	0	0
7	71	urban	5	classroom	classroom chair	0	0
7	72	urban	5	classroom	classroom chair	0	0
2	22	urban	4	classroom	classroom chair	0	0
1	14	urban	5	classroom	classroom chair	0	0
7	74	urban	5	classroom	classroom chair	0	0
4	45	urban	5	classroom	classroom chair	0	0
7	71	urban	5	classroom	classroom chair	0	0
2	24	urban	5	classroom	classroom chair	0	0
3	33	urban	5	classroom	classroom chair	0	0
4	45	urban	5	classroom	classroom chair	0	0
7	73	urban	5	classroom	classroom chair	0	0
4	43	urban	4	classroom	classroom chair	0	0
3	32	urban	4	classroom	classroom desk	0	0
4	41	urban	4	classroom	classroom desk	1	0
1	15	urban	5	classroom	classroom desk	0	0
8	82	urban	4	classroom	classroom desk	0	0
7	73	urban	5	classroom	classroom desk	0	0
3	34	urban	5	classroom	classroom desk	0	0
2	23	urban	4	classroom	classroom desk	0	0
4	43	urban	4	classroom	classroom desk	0	0
1	14	urban	5	classroom	classroom desk	0	0
2	22	urban	4	classroom	classroom desk	0	0
7	73	urban	5	classroom	classroom desk	0	0
4	44	urban	4	classroom	classroom desk	0	0
1	12	urban	4	classroom	classroom desk	1	0
4	45	urban	5	classroom	classroom desk	0	0
7	71	urban	5	classroom	classroom desk	0	0
8	83	urban	5	classroom	classroom desk	0	0
7	74	urban	5	classroom	classroom desk	0	0
1	11	urban	4	classroom	classroom desk	0	0
2	25	urban	5	classroom	classroom desk	0	0
4	47	urban	5	classroom	classroom desk	0	0
1	16	urban	5	classroom	classroom desk	1	0
4	48	urban	5	classroom	classroom desk	0	0
4	41	urban	4	classroom	classroom desk	0	0
3	34	urban	5	classroom	classroom desk	0	0
7	72	urban	5	classroom	classroom desk	0	0
8	81	urban	4	classroom	classroom desk	0	0
2	24	urban	5	classroom	classroom desk	0	0
2	22	urban	4	classroom	classroom desk	0	0
1	11	urban	4	classroom	classroom desk	0	0
1	11	urban	4	classroom	classroom desk	0	0
4	44	urban	4	classroom	classroom desk	0	0
7	72	urban	5	classroom	classroom desk	0	0
4	41	urban	4	classroom	classroom desk	0	0
3	33	urban	5	classroom	classroom desk	0	0
7	71	urban	5	classroom	classroom desk	0	0
3	33	urban	5	classroom	classroom desk	0	0
1	13	urban	4	classroom	classroom desk	0	0
3	33	urban	5	classroom	classroom desk	0	0
3	34	urban	5	classroom	classroom desk	0	0
2	24	urban	5	classroom	classroom desk	0	0
4	45	urban	5	classroom	classroom desk	0	0
4	47	urban	5	classroom	classroom desk	0	0
2	22	urban	4	classroom	classroom desk	0	0
4	42	urban	4	classroom	classroom desk	0	0
8	83	urban	5	classroom	classroom desk	0	0
8	84	urban	5	classroom	classroom desk	0	0
8	84	urban	5	classroom	classroom desk	0	0
4	42	urban	4	classroom	classroom desk	0	0
8	83	urban	5	classroom	classroom desk	0	0
1	13	urban	4	classroom	classroom desk	0	0
2	26	urban	5	classroom	classroom desk	0	0
8	83	urban	5	classroom	classroom desk	0	0
2	23	urban	4	classroom	classroom desk	0	0
4	46	urban	5	classroom	classroom desk	0	0
1	14	urban	5	classroom	classroom desk	0	0
1	16	urban	5	classroom	classroom desk	1	0
3	31	urban	4	classroom	classroom desk	0	0
3	31	urban	4	classroom	classroom desk	0	0
8	82	urban	4	classroom	classroom desk	0	0
8	82	urban	4	classroom	classroom desk	0	0
1	12	urban	4	classroom	classroom desk	0	0
1	14	urban	5	classroom	classroom desk	0	0
8	81	urban	4	classroom	classroom desk	0	0
3	31	urban	4	classroom	classroom desk	0	0
8	84	urban	5	classroom	classroom desk	0	0
8	83	urban	5	classroom	classroom desk	0	0
4	42	urban	4	classroom	classroom desk	0	0
7	71	urban	5	classroom	classroom desk	0	0
1	15	urban	5	classroom	classroom desk	0	0
1	15	urban	5	classroom	classroom desk	0	0
2	21	urban	4	classroom	classroom desk	0	0
4	46	urban	5	classroom	classroom desk	0	0
4	46	urban	5	classroom	classroom desk	0	0
2	26	urban	5	classroom	classroom desk	0	0
1	16	urban	5	classroom	classroom desk	0	0
2	21	urban	4	classroom	classroom desk	0	0
2	24	urban	5	classroom	classroom desk	0	0
8	82	urban	4	classroom	classroom desk	0	0
8	81	urban	4	classroom	classroom desk	0	0
4	44	urban	4	classroom	classroom desk	1	0
4	44	urban	4	classroom	classroom desk	0	0
8	84	urban	5	classroom	classroom desk	0	0
8	81	urban	4	classroom	classroom desk	0	0
3	32	urban	4	classroom	classroom desk	0	0
3	32	urban	4	classroom	classroom desk	0	0
3	32	urban	4	classroom	classroom desk	0	0
4	43	urban	4	classroom	classroom desk	0	0
4	43	urban	4	classroom	classroom desk	0	0
4	44	urban	4	classroom	classroom desk	0	0
1	15	urban	5	classroom	classroom desk	0	0
4	42	urban	4	classroom	classroom desk	0	0
4	43	urban	4	classroom	classroom desk	0	0
4	41	urban	4	classroom	classroom desk	0	0
7	71	urban	5	classroom	classroom desk	0	0
2	24	urban	5	classroom	classroom desk	0	0
4	47	urban	5	classroom	classroom desk	0	0
2	25	urban	5	classroom	classroom desk	0	0
7	74	urban	5	classroom	classroom desk	0	0
1	12	urban	4	classroom	classroom desk	0	0
4	48	urban	5	classroom	classroom desk	0	0
1	16	urban	5	classroom	classroom desk	0	0
7	73	urban	5	classroom	classroom desk	0	0
4	43	urban	4	classroom	classroom desk	0	0
3	33	urban	5	classroom	classroom desk	0	0
1	13	urban	4	classroom	classroom desk	0	0
1	16	urban	5	classroom	classroom desk	1	0
4	48	urban	5	classroom	classroom desk	0	0
4	45	urban	5	classroom	classroom desk	0	0
2	25	urban	5	classroom	classroom desk	0	0
1	13	urban	4	classroom	classroom desk	0	0
3	34	urban	5	classroom	classroom desk	0	0
7	72	urban	5	classroom	classroom desk	0	0
3	33	urban	5	classroom	classroom desk	0	0
2	21	urban	4	classroom	classroom desk	0	0
3	34	urban	5	classroom	classroom desk	0	0
2	21	urban	4	classroom	classroom desk	0	0
7	72	urban	5	classroom	classroom desk	0	0
1	11	urban	4	classroom	classroom desk	0	0
2	24	urban	5	classroom	classroom desk	0	0
2	26	urban	5	classroom	classroom desk	0	0
8	82	urban	4	classroom	classroom desk	0	0
1	14	urban	5	classroom	classroom desk	0	0
3	32	urban	4	classroom	classroom desk	0	0
7	73	urban	5	classroom	classroom desk	0	0
7	72	urban	5	classroom	classroom desk	0	0
3	31	urban	4	classroom	classroom desk	0	0
1	13	urban	4	classroom	classroom desk	0	0
1	12	urban	4	classroom	classroom desk	0	0
2	26	urban	5	classroom	classroom desk	0	0
2	23	urban	4	classroom	classroom desk	0	0
2	26	urban	5	classroom	classroom desk	1	0
2	22	urban	4	classroom	classroom desk	0	0
4	42	urban	4	classroom	classroom desk	1	0
2	25	urban	5	classroom	classroom desk	0	0
4	45	urban	5	classroom	classroom desk	0	0
8	84	urban	5	classroom	classroom desk	0	0
8	81	urban	4	classroom	classroom desk	0	0
7	73	urban	5	classroom	classroom desk	1	0
4	47	urban	5	classroom	classroom desk	0	0
2	23	urban	4	classroom	classroom desk	0	0
2	22	urban	4	classroom	classroom desk	0	0
3	31	urban	4	classroom	classroom desk	0	0
2	23	urban	4	classroom	classroom desk	0	0
2	25	urban	5	classroom	classroom desk	0	0
2	21	urban	4	classroom	classroom desk	0	0
4	41	urban	4	classroom	classroom desk	0	0
1	14	urban	5	classroom	classroom desk	0	0
6	63	rural	5	toilet	toilet flush handle	0	0
5	52	rural	4	toilet	toilet flush handle	0	0
5	52	rural	4	toilet	toilet flush handle	0	0
5	51	rural	4	toilet	toilet flush handle	0	0
5	51	rural	4	toilet	toilet flush handle	0	0
6	61	rural	4	toilet	toilet flush handle	0	0
6	61	rural	4	toilet	toilet flush handle	0	0
5	53	rural	5	toilet	toilet flush handle	0	0
6	62	rural	4	toilet	toilet flush handle	0	0
5	54	rural	5	toilet	toilet flush handle	0	0
6	62	rural	4	toilet	toilet flush handle	0	0
5	54	rural	5	toilet	toilet flush handle	0	0
6	63	rural	5	toilet	toilet flush handle	0	0
6	64	rural	5	toilet	toilet flush handle	1	0
5	53	rural	5	toilet	toilet flush handle	0	0
6	64	rural	5	toilet	toilet flush handle	0	0
6	62	rural	4	toilet	toilet floor	0	0
5	51	rural	4	toilet	toilet floor	0	0
5	53	rural	5	toilet	toilet floor	1	0
5	54	rural	5	toilet	toilet floor	0	0
6	64	rural	5	toilet	toilet floor	0	0
5	52	rural	4	toilet	toilet floor	0	0
6	61	rural	4	toilet	toilet floor	0	0
6	63	rural	5	toilet	toilet floor	0	0
6	64	rural	5	toilet	toilet light switch	0	0
5	52	rural	4	toilet	toilet light switch	0	0
6	62	rural	4	toilet	toilet light switch	0	0
5	54	rural	5	toilet	toilet light switch	0	0
5	52	rural	4	toilet	toilet light switch	0	0
6	63	rural	5	toilet	toilet light switch	0	0
5	53	rural	5	toilet	toilet light switch	0	0
6	63	rural	5	toilet	toilet light switch	0	0
6	61	rural	4	toilet	toilet light switch	0	0
6	62	rural	4	toilet	toilet light switch	0	0
6	61	rural	4	toilet	toilet light switch	0	0
5	51	rural	4	toilet	toilet light switch	0	0
5	54	rural	5	toilet	toilet light switch	0	0
5	53	rural	5	toilet	toilet light switch	0	0
6	64	rural	5	toilet	toilet light switch	0	0
5	51	rural	4	toilet	toilet light switch	0	0
5	54	rural	5	toilet	toilet door handle	0	0
6	64	rural	5	toilet	toilet door handle	0	0
5	53	rural	5	toilet	toilet door handle	0	0
6	61	rural	4	toilet	toilet door handle	0	0
5	51	rural	4	toilet	toilet door handle	0	0
6	62	rural	4	toilet	toilet door handle	0	0
5	52	rural	4	toilet	toilet door handle	0	0
6	63	rural	5	toilet	toilet door handle	0	0
5	53	rural	5	toilet	toilet faucet	1	0
5	54	rural	5	toilet	toilet faucet	0	0
6	63	rural	5	toilet	toilet faucet	0	0
5	52	rural	4	toilet	toilet faucet	0	0
6	62	rural	4	toilet	toilet faucet	0	0
6	64	rural	5	toilet	toilet faucet	0	0
5	51	rural	4	toilet	toilet faucet	0	0
5	52	rural	4	toilet	toilet faucet	0	0
6	61	rural	4	toilet	toilet faucet	0	0
6	61	rural	4	toilet	toilet faucet	0	0
5	53	rural	5	toilet	toilet faucet	1	0
5	51	rural	4	toilet	toilet faucet	0	0
5	54	rural	5	toilet	toilet faucet	0	0
6	62	rural	4	toilet	toilet faucet	0	0
6	64	rural	5	toilet	toilet faucet	0	0
6	63	rural	5	toilet	toilet faucet	0	0
5	52	rural	4	public place	handle of stairs	0	0
6	62	rural	4	public place	handle of stairs	0	0
5	51	rural	4	public place	handle of stairs	0	0
6	64	rural	5	public place	handle of stairs	0	0
5	54	rural	5	public place	handle of stairs	0	0
6	64	rural	5	public place	handle of stairs	1	0
6	63	rural	5	public place	handle of stairs	0	0
5	51	rural	4	public place	handle of stairs	0	0
5	53	rural	5	public place	handle of stairs	0	0
5	54	rural	5	public place	handle of stairs	0	0
6	62	rural	4	public place	handle of stairs	0	0
6	63	rural	5	public place	handle of stairs	0	0
6	61	rural	4	public place	handle of stairs	0	0
6	61	rural	4	public place	handle of stairs	0	0
5	53	rural	5	public place	handle of stairs	0	0
5	52	rural	4	public place	handle of stairs	0	0
5	51	rural	4	public place	floor of stairs	0	0
6	64	rural	5	public place	floor of stairs	0	0
6	62	rural	4	public place	floor of stairs	0	0
6	61	rural	4	public place	floor of stairs	0	0
5	54	rural	5	public place	floor of stairs	0	0
6	63	rural	5	public place	floor of stairs	0	0
5	52	rural	4	public place	floor of stairs	0	0
5	53	rural	5	public place	floor of stairs	0	0
5	51	rural	4	public place	floor of corridor	0	0
6	63	rural	5	public place	floor of corridor	0	0
5	54	rural	5	public place	floor of corridor	0	0
5	53	rural	5	public place	floor of corridor	0	0
6	61	rural	4	public place	floor of corridor	0	0
5	52	rural	4	public place	floor of corridor	0	0
6	62	rural	4	public place	floor of corridor	0	0
5	52	rural	4	classroom	classroom floor	0	0
5	53	rural	5	classroom	classroom floor	0	0
5	51	rural	4	classroom	classroom floor	0	0
5	54	rural	5	classroom	classroom floor	0	0
6	62	rural	4	classroom	classroom floor	0	0
6	64	rural	5	classroom	classroom floor	0	0
6	61	rural	4	classroom	classroom floor	0	0
6	62	rural	4	classroom	classroom light switch	0	0
5	54	rural	5	classroom	classroom light switch	0	0
6	61	rural	4	classroom	classroom light switch	0	0
5	53	rural	5	classroom	classroom light switch	0	0
6	64	rural	5	classroom	classroom light switch	0	0
5	52	rural	4	classroom	classroom light switch	0	0
5	53	rural	5	classroom	classroom light switch	0	0
5	54	rural	5	classroom	classroom light switch	0	0
5	51	rural	4	classroom	classroom light switch	0	0
6	62	rural	4	classroom	classroom light switch	0	0
6	63	rural	5	classroom	classroom light switch	0	0
5	51	rural	4	classroom	classroom light switch	0	0
6	63	rural	5	classroom	classroom light switch	0	0
6	61	rural	4	classroom	classroom light switch	0	0
5	52	rural	4	classroom	classroom light switch	0	0
6	64	rural	5	classroom	classroom light switch	0	0
5	54	rural	5	classroom	classroom air	0	0
6	64	rural	5	classroom	classroom air	0	0
6	61	rural	4	classroom	classroom air	0	0
6	64	rural	5	classroom	classroom air	0	0
6	63	rural	5	classroom	classroom air	0	0
6	62	rural	4	classroom	classroom air	0	0
6	61	rural	4	classroom	classroom air	0	0
5	51	rural	4	classroom	classroom air	0	0
6	63	rural	5	classroom	classroom air	0	0
6	62	rural	4	classroom	classroom air	0	0
6	64	rural	5	classroom	classroom air	0	0
5	54	rural	5	classroom	classroom air	0	0
5	51	rural	4	classroom	classroom air	0	0
5	52	rural	4	classroom	classroom air	0	0
5	53	rural	5	classroom	classroom air	0	0
5	52	rural	4	classroom	classroom air	0	0
5	52	rural	4	classroom	classroom air	0	0
6	62	rural	4	classroom	classroom air	0	0
5	53	rural	5	classroom	classroom air	0	0
5	52	rural	4	classroom	classroom air	0	0
5	52	rural	4	classroom	classroom air	0	0
6	63	rural	5	classroom	classroom air	0	0
6	61	rural	4	classroom	classroom air	0	0
6	62	rural	4	classroom	classroom air	0	0
6	61	rural	4	classroom	classroom air	0	0
6	61	rural	4	classroom	classroom air	0	0
6	64	rural	5	classroom	classroom air	0	0
6	63	rural	5	classroom	classroom air	0	0
6	62	rural	4	classroom	classroom air	1	0
5	54	rural	5	classroom	classroom air	0	0
5	54	rural	5	classroom	classroom air	0	0
6	64	rural	5	classroom	classroom air	0	0
5	53	rural	5	classroom	classroom air	0	0
6	63	rural	5	classroom	classroom air	0	0
5	51	rural	4	classroom	classroom air	0	0
5	51	rural	4	classroom	classroom air	0	0
5	51	rural	4	classroom	classroom air	0	0
5	54	rural	5	classroom	classroom air	0	0
5	53	rural	5	classroom	classroom air	0	0
5	53	rural	5	classroom	classroom air	0	0
5	53	rural	5	classroom	classroom door handle	0	0
5	52	rural	4	classroom	classroom door handle	0	0
6	64	rural	5	classroom	classroom door handle	0	0
6	62	rural	4	classroom	classroom door handle	0	0
5	51	rural	4	classroom	classroom door handle	0	0
6	63	rural	5	classroom	classroom door handle	0	0
5	54	rural	5	classroom	classroom door handle	0	0
6	61	rural	4	classroom	classroom door handle	0	0
5	54	rural	5	classroom	classroom chair	0	0
5	51	rural	4	classroom	classroom chair	0	0
6	64	rural	5	classroom	classroom chair	0	0
6	62	rural	4	classroom	classroom chair	0	0
6	62	rural	4	classroom	classroom chair	0	0
6	64	rural	5	classroom	classroom chair	0	0
5	54	rural	5	classroom	classroom chair	0	0
6	62	rural	4	classroom	classroom chair	0	0
6	61	rural	4	classroom	classroom chair	0	0
6	63	rural	5	classroom	classroom chair	0	0
5	52	rural	4	classroom	classroom chair	0	0
6	61	rural	4	classroom	classroom chair	0	0
5	52	rural	4	classroom	classroom chair	0	0
6	62	rural	4	classroom	classroom chair	0	0
5	51	rural	4	classroom	classroom chair	0	0
6	64	rural	5	classroom	classroom chair	0	0
6	61	rural	4	classroom	classroom chair	0	0
6	64	rural	5	classroom	classroom chair	0	0
6	62	rural	4	classroom	classroom chair	0	0
5	54	rural	5	classroom	classroom chair	0	0
5	51	rural	4	classroom	classroom chair	0	0
6	61	rural	4	classroom	classroom chair	0	0
5	54	rural	5	classroom	classroom chair	0	0
5	51	rural	4	classroom	classroom chair	0	0
6	64	rural	5	classroom	classroom chair	0	0
6	63	rural	5	classroom	classroom chair	0	0
5	53	rural	5	classroom	classroom chair	0	0
5	52	rural	4	classroom	classroom chair	0	0
6	63	rural	5	classroom	classroom chair	0	0
5	52	rural	4	classroom	classroom chair	0	0
5	52	rural	4	classroom	classroom chair	0	0
6	63	rural	5	classroom	classroom chair	0	0
5	53	rural	5	classroom	classroom chair	0	0
5	54	rural	5	classroom	classroom chair	0	0
5	51	rural	4	classroom	classroom chair	0	0
6	61	rural	4	classroom	classroom chair	0	0
5	53	rural	5	classroom	classroom chair	0	0
6	63	rural	5	classroom	classroom chair	0	0
5	53	rural	5	classroom	classroom chair	0	0
5	53	rural	5	classroom	classroom chair	0	0
6	64	rural	5	classroom	classroom desk	0	0
5	51	rural	4	classroom	classroom desk	1	0
6	62	rural	4	classroom	classroom desk	0	0
5	52	rural	4	classroom	classroom desk	1	0
6	64	rural	5	classroom	classroom desk	0	0
5	53	rural	5	classroom	classroom desk	0	0
5	52	rural	4	classroom	classroom desk	1	0
6	63	rural	5	classroom	classroom desk	0	0
6	63	rural	5	classroom	classroom desk	0	0
6	64	rural	5	classroom	classroom desk	0	0
6	61	rural	4	classroom	classroom desk	0	0
5	52	rural	4	classroom	classroom desk	0	0
6	61	rural	4	classroom	classroom desk	0	0
5	51	rural	4	classroom	classroom desk	0	0
6	64	rural	5	classroom	classroom desk	0	0
5	53	rural	5	classroom	classroom desk	0	0
5	53	rural	5	classroom	classroom desk	0	0
6	62	rural	4	classroom	classroom desk	0	0
5	51	rural	4	classroom	classroom desk	0	0
6	64	rural	5	classroom	classroom desk	0	0
6	62	rural	4	classroom	classroom desk	0	0
5	53	rural	5	classroom	classroom desk	0	0
5	54	rural	5	classroom	classroom desk	0	0
6	63	rural	5	classroom	classroom desk	0	0
6	63	rural	5	classroom	classroom desk	0	0
6	62	rural	4	classroom	classroom desk	1	0
5	54	rural	5	classroom	classroom desk	0	0
6	63	rural	5	classroom	classroom desk	0	0
5	51	rural	4	classroom	classroom desk	0	0
6	61	rural	4	classroom	classroom desk	0	0
5	51	rural	4	classroom	classroom desk	0	0
6	61	rural	4	classroom	classroom desk	0	0
5	54	rural	5	classroom	classroom desk	0	0
5	52	rural	4	classroom	classroom desk	0	0
5	54	rural	5	classroom	classroom desk	0	0
6	62	rural	4	classroom	classroom desk	0	0
5	52	rural	4	classroom	classroom desk	0	0
7	71	urban	5	toilet	toilet flush handle	1	1	0	1	1	0	1	1	0	0	0	1	1	1	0	0	0	1	1	398	398
7	74	urban	5	toilet	toilet flush handle	1	1	0	0	1	0	0	0	0	0	0	1	0	1	0	0	0	0	0	6	6
1	12	urban	4	toilet	toilet floor	1	1	0	1	1	0	1	1	1	0	0	1	1	0	0	0	0	1	1	488	121
4	45	urban	5	toilet	toilet floor	1	1	0	0	1	0	1	0	0	0	0	0	0	0	0	0	0	0	0	2114	6
4	43	urban	4	toilet	toilet floor	1	1	0	0	1	0	0	0	0	0	0	0	0	0	0	1	0	0	0	6	6
4	44	urban	4	toilet	toilet floor	1	1	0	0	1	0	1	1	0	0	0	0	0	1	0	0	1	0	1	30	30
2	24	urban	5	toilet	toilet floor	1	1	0	1	1	1	1	1	0	0	1	1	1	1	0	0	1	0	1	2102	30
1	11	urban	4	toilet	toilet faucet	1	1	0	1	1	1	1	1	1	0	0	1	1	1	0	0	0	0	1	396	45
1	14	urban	5	toilet	toilet faucet	1	1	0	1	1	0	1	1	0	1	0	1	1	1	1	0	0	0	1	217	22
1	13	urban	4	toilet	toilet faucet	1	1	0	1	1	0	1	1	0	1	1	1	1	1	0	0	0	0	1	946	121
2	24	urban	5	public place	handle of stairs	1	1	0	1	1	0	1	1	0	0	0	1	1	1	0	0	1	0	1	30	30
2	23	urban	4	public place	handle of stairs	1	1	0	1	1	0	1	1	0	0	0	1	1	1	0	0	0	1	1	188	188
4	47	urban	5	public place	handle of stairs	1	1	0	0	1	0	0	1	0	0	0	0	0	1	0	0	1	0	0	30	30
1	13	urban	4	public place	handle of stairs	1	1	0	1	1	0	1	1	0	0	0	1	1	1	0	0	0	0	1	1295	188
4	42	urban	4	public place	handle of stairs	1	1	0	1	1	0	0	1	0	0	0	1	1	1	0	0	1	0	1	30	30
8	81	urban	4	public place	handle of stairs	1	1	0	0	0	0	1	1	0	0	0	0	0	0	0	0	1	0	0	2103	398
8	81	urban	4	public place	handle of stairs	1	1	0	0	0	0	1	0	0	0	0	0	0	0	0	0	0	0	0	398	398
8	84	urban	5	public place	floor of stairs	1	1	0	0	1	0	1	0	1	0	0	0	0	1	1	0	1	1	1	25	25
4	46	urban	5	public place	floor of stairs	1	1	0	0	1	0	1	1	0	0	0	0	0	0	0	0	0	0	0	188	188
2	21	urban	4	public place	floor of corridor	1	1	0	1	1	0	1	1	0	0	0	1	1	1	0	0	0	0	1	950	5
1	14	urban	5	public place	floor of corridor	1	1	0	1	1	1	1	1	1	1	1	1	1	1	0	0	0	0	1	5	5
7	74	urban	5	classroom	classroom floor	1	1	0	0	1	0	0	0	0	0	0	0	0	0	0	0	0	0	0	2791	188
1	14	urban	5	classroom	classroom floor	1	1	0	1	1	0	1	1	0	0	0	1	1	1	0	0	0	0	1	535	30
4	48	urban	5	classroom	classroom floor	1	1	0	0	1	0	1	1	0	0	0	0	0	1	0	0	0	0	1	188	188
2	22	urban	4	classroom	classroom floor	1	1	0	0	1	0	1	1	0	0	1	1	1	1	0	0	1	0	1	30	30
7	74	urban	5	classroom	classroom light switch	1	1	0	0	1	0	1	1	0	0	0	0	0	1	0	1	0	0	1	489	121
4	48	urban	5	classroom	classroom light switch	1	1	0	0	1	0	1	1	0	0	0	0	0	1	1	0	0	0	1	217	22
7	71	urban	5	classroom	classroom air	1	1	0	1	1	0	1	1	0	0	0	1	1	1	0	0	0	0	1	198	198
1	14	urban	5	classroom	classroom air	1	1	0	1	1	0	1	1	0	0	0	1	1	1	0	0	1	0	1	30	30
1	14	urban	5	classroom	classroom air	1	1	0	1	1	0	1	1	0	0	0	1	1	1	0	0	0	0	1	6	6
7	74	urban	5	classroom	classroom door handle	1	1	0	1	1	0	1	1	0	1	0	1	1	1	0	0	0	0	1	188	188
4	48	urban	5	classroom	classroom door handle	1	1	0	0	1	0	1	1	0	0	0	0	0	0	0	0	0	0	0	6	6
2	23	urban	4	classroom	classroom chair	1	1	0	1	1	0	1	1	0	0	0	1	1	1	0	0	0	1	1	188	188
7	74	urban	5	classroom	classroom chair	1	1	0	0	1	0	1	0	0	0	0	0	0	0	0	0	0	0	0	188	188
4	44	urban	4	classroom	classroom chair	1	1	0	0	1	0	0	0	0	0	0	1	0	0	0	0	0	0	0	2694	182
4	46	urban	5	classroom	classroom chair	1	1	0	0	1	0	1	1	0	0	0	0	0	0	0	0	0	0	0	6	6
2	22	urban	4	classroom	classroom chair	1	1	0	1	1	1	1	1	1	0	1	1	1	1	0	0	0	0	1	965	5
2	21	urban	4	classroom	classroom chair	1	1	0	1	1	0	1	1	0	0	0	1	1	1	0	0	0	1	1	1018	5
1	14	urban	5	classroom	classroom chair	1	1	0	1	1	0	1	1	0	0	0	1	1	1	0	0	1	0	1	535	30
4	48	urban	5	classroom	classroom desk	1	1	0	0	1	0	0	1	0	0	0	0	0	1	0	0	0	0	0	30	30
1	12	urban	4	classroom	classroom desk	1	1	0	1	1	1	1	1	1	0	1	1	1	1	0	0	1	0	1	30	30
4	45	urban	5	classroom	classroom desk	1	1	0	0	1	0	0	1	0	0	0	0	0	0	0	0	0	0	0	398	398
1	11	urban	4	classroom	classroom desk	1	1	0	1	1	1	1	1	1	0	0	1	1	1	0	0	0	1	1	5	5
4	47	urban	5	classroom	classroom desk	1	1	0	0	1	0	1	1	0	0	0	0	0	1	0	0	0	0	1	217	22
7	74	urban	5	classroom	classroom desk	1	1	0	1	1	0	1	1	0	0	0	1	1	1	0	0	0	0	1	188	188
4	46	urban	5	classroom	classroom desk	1	1	0	1	1	0	1	0	0	0	0	0	0	1	0	0	0	0	1	944	182
7	71	urban	5	classroom	classroom desk	1	1	0	1	1	0	1	1	0	0	0	1	1	1	0	0	0	0	1	1891	45
7	74	urban	5	classroom	classroom desk	1	1	0	1	1	0	1	1	0	0	0	1	1	1	0	0	0	0	1	1047	188
1	15	urban	5	classroom	classroom desk	1	1	0	1	1	1	1	1	1	1	1	1	1	1	0	0	0	0	1	5	5
4	48	urban	5	classroom	classroom desk	1	1	0	0	1	0	1	1	0	0	0	0	1	0	0	0	0	0	1	398	398
4	46	urban	5	classroom	classroom desk	1	1	0	0	1	0	1	1	0	1	0	0	0	1	0	0	0	1	1	59	59
7	74	urban	5	classroom	classroom desk	1	1	0	0	1	0	0	0	0	0	0	1	0	0	0	0	0	0	0	188	188
6	64	rural	5	public place	floor of corridor	1	1	0	1	1	0	1	1	0	1	0	1	1	1	0	0	0	0	1	45	45
6	63	rural	5	classroom	classroom floor	1	1	0	1	1	0	1	1	0	0	0	1	1	1	0	0	0	0	1	6	6
5	53	rural	5	classroom	classroom desk	1	1	0	1	1	0	1	1	0	1	1	1	1	1	0	1	0	0	1	573	1
5	54	rural	5	classroom	classroom desk	1	1	0	1	1	0	1	1	0	0	0	1	1	1	0	1	0	0	1	6	6
6	61	rural	4	classroom	classroom desk	1	1	0	1	1	0	1	1	0	0	0	1	1	1	0	0	0	0	1	398	398
